# Supplementary material for: Resolving the timescales of magmatic and hydrothermal processes associated with porphyry deposit formation using zircon U–Pb petrochronology
Source: Copernicus journal article supplement (doi:10.5194/gchron-2-209-2020), 2020-07-31
Supplement: Supplementary file 1 [file gchron-2-209-2020-supplement.zip]

Archive with 2 entries (2 files):
- Suppl_LargeEtAl_BatuHijau_revised.xlsx
- gchron-2-209-2020-supplement-title-page.pdf
