# Supplementary material for: Resolving the timescales of magmatic and hydrothermal processes associated with porphyry deposit formation using zircon U–Pb petrochronology
Source: Copernicus journal article supplement (doi:10.5194/gchron-2-209-2020), 2020-07-31
Supplement: Supplementary file 1 [file gchron-2-209-2020-supplement.zip › gchron-2-209-2020-supplement-title-page.pdf]

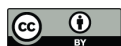

## *Supplement of*

# **Resolving the timescales of magmatic and hydrothermal processes associated with porphyry deposit formation using zircon U–Pb petrochronology**

**Simon J. E. Large et al.**

*Correspondence to:* Simon J. E. Large (s.large@nhm.ac.uk)

- gchron-2-209-2020-supplement-title-page.pdf
- Suppl\_LargeEtAl\_BatuHijau\_revised.xlsx

The copyright of individual parts of the supplement might differ from the CC BY 4.0 License.
