# Supplementary material for: Resolving the timescales of magmatic and hydrothermal processes associated with porphyry deposit formation using zircon U–Pb petrochronology
Source: Copernicus journal article supplement (doi:10.5194/gchron-2-209-2020), 2020-07-31
Supplement: Supplementary file 1 [file gchron-2-209-2020-supplement.zip › Suppl_LargeEtAl_BatuHijau_revised.xlsx]

## Sheet: CA-ID-TIMS Geochron
Zircon ID	Sample ID	Composition					Isotopic Ratios									Dates (Ma)
	TIMS ID	Th/U a	Pb* (pg) b	Pbc (pg) c	Pb*/Pbc d	Th/U (magma) e	206Pb/204Pb f	206Pb/238U g	±2σ %	206Pb/238U (Th) gh	±2σ %	207Pb/235U g	±2σ %	207Pb/206Pb g	±2σ %	206Pb/238U i	±2σ abs	206Pb/238U (Th) h	±2σ abs	207Pb/235U i	±2σ abs	coef.	% disc j
Young tonalite
	4_z9	0.380296	0.426902	0.248891	1.71522	1.52118	124.391	0.000553073	0.604593	0.000566	0.61	0.00292801	13.0718	0.0383963	12.6268	3.56435	0.0215439	3.64618	0.0223104	2.96871	0.387496	0.746608	100.779
	4_z14	0.418281	0.802377	0.227453	3.52767	1.67312	232.75	0.000555683	0.48184	0.000568	0.55	0.00348916	5.37589	0.0455399	5.15492	3.58117	0.0172507	3.66313	0.020009	3.53667	0.189796	0.49393	113.423
	4_z12	0.581071	0.515271	0.221676	2.32443	2.32429	152.83	0.0005571	0.440282	0.00057	0.5	0.00396918	7.33735	0.0516733	7.02594	3.5903	0.015803	3.6721	0.0184856	4.02227	0.294544	0.722261	98.6751
	4_z1	0.410607	0.612479	0.216362	2.83081	1.64243	190.315	0.000560021	0.305728	0.000573	0.4	0.00376308	5.54349	0.0487347	5.34141	3.60911	0.011031	3.69093	0.0149284	3.81379	0.211021	0.676436	97.3283
	4_z11	0.595007	0.126316	0.228928	0.551773	2.38003	50.1022	0.000562004	1.38794	0.000575	1.3	0.00429947	23.9367	0.0554848	23.0807	3.6219	0.0502556	3.70397	0.0485011	4.35625	1.04051	0.634658	99.1612
	4_z6	0.482357	0.602813	0.199142	3.02705	1.92943	198.399	0.000562442	0.255731	0.000575	1.1	0.00389684	4.65995	0.0502497	4.50327	3.62472	0.00926693	3.70644	0.0140026	3.9491	0.183669	0.629732	98.2452
	4s_z12	0.616219	0.0788728	0.0874926	0.901479	2.46488	70.2546	0.00056216	1.1254	0.000575	0.38	0.0036263	22.0641	0.0467845	21.2281	3.6229	0.0407606	3.70801	0.0393488	3.67542	0.809482	0.754261	90.5266
	4s_65fc	0.657946	0.489245	1.37653	0.355419	1.76	38.2639	0.000567018	2.21234	0.00057761	2.04376	0.00557287	29.9151	0.071314	28.5533	3.6542	0.0808203	3.72244	0.0760558	5.64289	1.6834	0.638507	99.6215
	4_z5	0.438495	0.530643	0.160032	3.31586	1.75398	218.086	0.00056553	0.27529	0.000578	0.39	0.00386232	4.6268	0.0495327	4.44742	3.64461	0.0100304	3.72655	0.0143613	3.91418	0.180753	0.668644	97.8948
	4s_z4	0.460704	0.14429	0.133985	1.07691	1.84282	83.063	0.000566374	0.72338	0.000579	0.71	0.00357839	14.9037	0.045823	14.4314	3.65005	0.0263962	3.73186	0.0266569	3.62695	0.539584	0.666786	131.223
	4_z3	0.416575	0.156265	0.138613	1.12734	1.6663	86.715	0.00056965	0.732483	0.000582	0.71	0.00388425	13.9591	0.0494536	13.4588	3.67115	0.0268829	3.75323	0.0267722	3.93636	0.548418	0.697087	97.8328
	4_z4	0.489867	0.577997	0.632523	0.913797	1.95947	72.3507	0.000575833	0.783519	0.000589	0.77	0.00449414	13.3463	0.0566042	12.8844	3.71099	0.029068	3.79285	0.0291447	4.55305	0.606303	0.608722	99.2206
	4_z2	0.422549	0.845984	0.143644	5.88944	1.69019	375.515	0.000579637	0.190135	0.000592	0.34	0.00373273	3.00992	0.0467057	2.88525	3.7355	0.00710044	3.81718	0.0128974	3.7831	0.113656	0.673517	89.0791
Intermediate tonalite
	2_z25	0.548295	0.76953	0.381594	2.01662	2.19318	136.173	0.000560942	0.411701	0.000574	0.48	0.00390301	7.39199	0.0504639	7.13812	3.61505	0.014879	3.69698	0.0177672	3.95534	0.29181	0.63387	98.3296
	2_z17	0.413042	0.867002	0.469359	1.8472	1.65217	130.447	0.000564051	0.408067	0.000577	0.47	0.00384123	7.6307	0.0493914	7.38562	3.63508	0.0148294	3.71673	0.0175294	3.89285	0.296483	0.617639	97.8161
	2_z18	0.476288	0.785861	0.487447	1.6122	1.90515	114.379	0.000564497	0.475953	0.000577	0.52	0.00396005	8.62948	0.0508789	8.33847	3.63795	0.01731	3.72001	0.0194161	4.01303	0.34562	0.628671	98.4542
	2_z26	0.462187	0.830463	0.395511	2.09972	1.84875	143.89	0.000565609	0.338458	0.000578	0.43	0.00396546	6.33776	0.0508483	6.13876	3.64512	0.0123337	3.72684	0.0158744	4.0185	0.25418	0.605383	98.442
	2_13	0.458329	0.782697	0.354157	2.21003	1.83332	150.421	0.000566918	0.34712	0.00058	0.43	0.00411731	6.10457	0.0526735	5.89167	3.65355	0.0126786	3.7355	0.0160347	4.17206	0.254164	0.631017	98.8393
	2_z4	0.462357	0.35812	0.174197	2.05583	1.84943	142.175	0.000567272	0.436513	0.00058	0.49	0.00328582	9.30799	0.0420098	9.00129	3.65583	0.0159537	3.73754	0.0184092	3.33089	0.309531	0.714455	101.618
	2_z3	0.396004	2.73289	0.592531	4.61223	1.58402	299.713	0.000572081	0.173581	0.000585	0.33	0.00382487	3.06651	0.0484906	2.96549	3.68682	0.0063978	3.76894	0.0123899	3.8763	0.118641	0.6005	97.0093
	2_20fc	0.38811	0.715986	0.138492	5.16986	1.88	335.117	0.000574037	0.234598	0.000587461	0.320968	0.00364972	3.79077	0.046133	3.61634	3.69942	0.00867629	3.78591	0.012148	3.69912	0.13997	0.756751	-5.64989
	2_z9	0.609757	1.42408	0.155334	9.16789	2.43903	545.604	0.000575176	0.110864	0.000588	0.31	0.00391631	1.75389	0.0493827	1.68539	3.70676	0.00410826	3.78862	0.0116693	3.96879	0.0694725	0.63689	97.7676
	2_21	0.571907	0.200867	0.381498	0.526522	2.28763	48.7612	0.000575754	1.33506	0.000588	1.3	0.00466035	22.2662	0.0587058	21.503	3.71048	0.049523	3.79224	0.0478271	4.72105	1.04876	0.591777	99.3329
	2_22fc	0.523261	1.05498	0.140361	7.5162	1.56	461.93	0.000579352	0.142751	0.000590594	0.40907	0.00375393	2.3358	0.0470149	2.23786	3.73366	0.00532828	3.80609	0.015565	3.80454	0.0887001	0.700703	92.3679
	2_z2	0.43217	0.645204	0.402868	1.60152	1.72868	115.182	0.000578756	0.45896	0.000591	0.32	0.0037992	9.07709	0.0476097	8.79648	3.72982	0.0171134	3.81153	0.0192155	3.85033	0.348836	0.627197	95.3329
	2_z23	0.46507	0.589441	0.290135	2.03161	1.86028	140.01	0.000579321	0.359115	0.000591	0.5	0.00384267	7.0365	0.0481075	6.82099	3.73346	0.0134035	3.81501	0.0166613	3.8943	0.273498	0.616386	96.4293
	2_6fc	0.534776	1.14604	0.50517	2.26861	2.08	151.391	0.000581474	0.947121	0.000594041	0.965327	0.00408191	6.42086	0.0509361	6.14418	3.74733	0.0354815	3.8283	0.0369446	4.13627	0.265044	0.359497	98.4183
	2_z19	0.481168	2.86857	0.653972	4.38638	1.92467	279.42	0.000582392	1.27547	0.000595	1.3	0.00400397	3.37601	0.0498625	3.03414	3.75325	0.0478577	3.83503	0.0490493	4.05744	0.136707	0.443343	98.0098
	2_11fc	0.470933	1.84239	0.376901	4.88828	2.12	310.39	0.000594995	0.630731	0.000608153	0.660222	0.00402246	3.59285	0.0490535	3.34293	3.83445	0.0241779	3.91922	0.0258677	4.07614	0.146156	0.470005	97.4325
Old tonalite
	1_z13	0.40969	0.467333	0.340915	1.37082	1.63876	101.935	0.000567071	0.586773	0.00058	0.61	0.00352591	11.3735	0.0450954	11.0183	3.65454	0.0214378	3.73641	0.0226275	3.57385	0.405759	0.621777	107.237
	1_z1	0.470296	0.471263	0.63905	0.737443	1.88119	62.4422	0.000567167	0.942618	0.00058	0.93	0.00384464	18.5666	0.0491636	18.0156	3.65516	0.0344444	3.73699	0.0348282	3.8963	0.722024	0.601228	97.6515
	1_z2	0.595211	0.32866	0.115794	2.83831	2.38084	182.92	0.00056901	0.429383	0.000582	0.45	0.00347524	7.83117	0.0442959	7.50013	3.66703	0.0157411	3.7491	0.0170397	3.52259	0.275382	0.782043	103.892
	1_16	0.725712	0.338716	0.246414	1.37458	2.90285	94.9208	0.000569322	0.644131	0.000582	0.63	0.0041113	11.2522	0.0523745	10.8285	3.66904	0.0236267	3.75106	0.0236	4.16599	0.467806	0.674099	98.7843
	1_z11	0.498311	0.936754	0.347106	2.69876	1.99324	178.457	0.000571641	0.297308	0.000584	0.4	0.00380072	5.58121	0.0482216	5.39518	3.68398	0.0109496	3.76593	0.0149857	3.85188	0.214574	0.641876	96.6556
	1_z20	0.422734	0.217125	0.133548	1.62582	1.69094	116.909	0.000571977	0.500698	0.000585	0.54	0.00375152	9.55251	0.0475694	9.21832	3.68614	0.0184512	3.76782	0.0201845	3.80211	0.362517	0.681971	95.2687
	1_z6	0.530514	0.337089	0.285574	1.18039	2.12206	87.5012	0.000573136	0.604927	0.000586	0.63	0.00422958	10.8909	0.0535227	10.5364	3.69361	0.0223373	3.77544	0.0236018	4.28559	0.465755	0.604242	98.9478
	1_z12.2	0.471056	0.376431	0.320583	1.17421	1.88422	88.4476	0.000574982	0.633668	0.000588	0.64	0.00398358	11.8484	0.0502479	11.46	3.70551	0.0234739	3.78729	0.0243789	4.03682	0.47735	0.629711	98.2054
	1_z21	0.489537	1.12623	1.195	0.942451	1.95815	74.4247	0.00058496	0.771913	0.000598	0.76	0.00391061	15.2164	0.048486	14.7509	3.76979	0.029091	3.85167	0.0291831	3.96302	0.601856	0.619269	96.9364
	1_z5	0.527002	0.23878	0.264056	0.904277	2.10801	71.7689	0.000586375	1.4157	0.000599	1.4	0.0036302	19.2365	0.0449007	18.5567	3.77891	0.0534825	3.86091	0.0530487	3.67937	0.7065	0.508457	106.191
	1_z4.2	0.604914	0.0801329	0.197282	0.406185	2.41966	41.7872	0.000589422	2.10319	0.000602	2	0.00405397	39.0978	0.0498831	37.6717	3.79854	0.0798668	3.88061	0.0759918	4.10802	1.6029	0.69257	97.996
	1_z12	0.603765	0.11435	0.125689	0.909784	2.41506	70.6972	0.00059117	0.984938	0.000604	0.95	0.00424853	17.1592	0.0521225	16.4829	3.8098	0.0375131	3.89148	0.0370601	4.30475	0.737095	0.701817	98.6898
	1_z14	0.344696	0.22846	0.241633	0.945482	1.37879	77.3255	0.000599749	0.795718	0.000612	0.75	0.00335392	18.2969	0.0405584	17.7822	3.86507	0.0307459	3.94654	0.0297636	3.39981	0.621021	0.659559	101.226
	1_z8	0.492709	0.482607	0.362257	1.33222	1.97083	97.8076	0.000600116	0.666855	0.000613	0.67	0.00366298	13.3684	0.0442688	12.9425	3.86744	0.0257825	3.94913	0.0265207	3.71253	0.495398	0.653316	104.04
	1_z4	0.541437	0.46676	0.299199	1.56003	2.16575	109.941	0.000605002	0.483735	0.000618	0.52	0.00393978	9.74175	0.0472295	9.44548	3.89892	0.0188547	3.98069	0.020842	3.99253	0.388178	0.627955	93.5925
	1_z03	0.456664	0.559079	0.232962	2.39987	1.82665	162.203	0.000605181	0.319487	0.000618	0.4	0.00415067	5.86819	0.0497429	5.67118	3.90007	0.0124564	3.98212	0.01591	4.20579	0.246294	0.63348	97.8688
a Th contents calculated from radiogenic 208Pb and the 207Pb/206Pb date of the sample, assuming concordance between U-Th and Pb systems.
b Total mass of radiogenic Pb.
c Total mass of common Pb.
d Ratio of radiogenic Pb (including 208Pb) to common Pb.
e Th/U ratio of magma from which mineral crystallized.
f Measured ratio corrected for fractionation and spike contribution only.
g Measured ratios corrected for fractionation, tracer and blank.
h Corrected for initial Th/U disequilibrium using radiogenic 208Pb and Th/U[magma] specified.
i Isotopic dates calculated using the decay constants λ238 = 1.55125E-10 and λ235 = 9.8485E-10 (Jaffey et al. 1971).
j % discordance = 100 - (100 * (206Pb/238U date) / (207Pb/206Pb date))

## Sheet: LA-ICP-MS metadata
LA-ICP-MS U-(Th-)Pb Metadata
Laboratory and Sample Preparation
Laboratory name	Dept of Earth Sciences, ETH Zurich
Sample type/mineral	Magmatic Zircons
Sample preparation	Conventional mineral separation, 1 inch resin mount, 1 mm polish to finish
Imaging	CL, Vega3 Tescan, 15 kV, working distance 35 mm
Laser ablation system
Make, Model and type	ASI (Resonetics) Resolution S155
Ablation cell and volume	Laurin Technic, 2 volume cell, effective volume ca. 1 cm3
Laser wavelength (nm)	193 nm
Pulse width (ns)	25 ns
Fluence (J cm-2)	~2 J cm-2
Repetition rate (Hz)	5 Hz
Ablation duration (s)	40 s
Ablation pit depth / ablation rate	~16 mm pit depth, equivalent to 0.08 mm/pulse
Spot diameter (mm) nominal/actual	30 mm / 30 mm
Sampling mode / pattern	Static spot ablation
Carrier gas	100% He in the cell, Ar make-up gas combined in cell above ablation in funnel.
Cell carrier gas flow (l min-1)	0.7 l min-1
ICP-MS Instrument
Make, Model and type	Thermo Element XR, Sector-field single collector ICP-MS
Sample introduction	direct
RF power (W)	1400 W - 1550W (optimized daily)
Make-up gas flow (l min-1)	0.90 - 0.99 l min-1 Ar (optimized daily)
Detection system	triple (pulse counting, analog, Faraday) cross calibrated daily
Masses measured (amu)	(7),27,31,49,88,89,93,138,139,140,141,146,147,153,157,159,163,165,166,169,172,175,178,202, 204, 206, 207, 208, 232, 235, 238
Integration time per peak/dwell times (ms)	5 ms (masses 27, 29, 31, 88, 89, 93, 138, 139, 140, 178), 10 ms (7, 141, 146, 147, 153, 157, 159, 163, 165, 166, 172, 175, 208, 232, 235), 20 ms (204, 238), 25 ms (49), 100 ms (206, 207)
Total integration time per output data point (s)	0.672 s
Dead time (ns)	16
Typical oxide rate (ThO/Th)	0.0018
Typical doubly charged rate (Ba++/Ba+)	0.035
Data Processing
Gas blank	30 s
Calibration strategy	91500 used as primary reference material, Temora, GJ-1, AUSZ7-1 and AUSZ7-5 used as secondaries for validation
Reference Material info	91500 (Wiedenbeck et al. 1995), 1065 Ma
	GJ-1 (Jackson et al. 2004), 600.5 Ma
	Temora (Black et al. 2003), 417 Ma
	AUSZ7-1 (similar to Kennedy 2014), 38.9 Ma
	AUSZ7-5 (VonQuadt et al. 2016), 2.4 Ma
Data processing package used / Correction for LIEF	Iolite 2.5, VizualAge for uncertainty propagation and age calculation. LIEF correction assumes reference material and samples behave identically.
Mass discrimination	normalised to reference material
Common-Pb correction, composition and uncertainty	No common-Pb correction applied to the data.
Uncertainty level and propagation	Ages are quoted at 2s absolute, propagation is by quadratic addition. Reproducibility and age uncertainty of reference material are propagated where appropriate.
Th disequilibrium correction	Disequilibrium from initial Th was corrected for Pleistocene zircons assuming Th/U (magma) of 2 with an Uncertainty of 30%. Uncertainties are propagated.
Quality control / Validation	Temora: Wtd ave 206Pb/238U age = 416 ± 6 (2s, MSWD = 2.08, n = 18) (0.30% Wtd ave uncert. (internal), 1.5% Total external uncert.).
	AusZ7_1 - Wtd ave 206Pb/238U age = 38.6 ± 0.6 (2s, MSWD = 1.72, n = 18) (0.5% Wtd ave uncert. (internal), 1.6% total external uncert.)
	AusZ7_5 – Wtd ave 206Pb/238U age = 2.38 ± 0.06 (2s, MSWD = 0.87, n = 17) (1.9% Wtd ave uncert. (internal), 2.5% Total external uncert.).
	GJ-1 – Wtd ave 206Pb/238U age = 606 ± 9 (2s, MSWD = 0.57, n = 17) (0.3% Wtd ave uncert. (internal), 1.5% Total external uncert.)
	Systematic uncertainty for propagation is 1.5% (2s).

## Sheet: LA-ICP-MS Dates
Identifier	Integ. length (s)	Final 207/ 235	Final 207/235 prop2s	Final 206/238	Final 206/238 prop2s	Error Corr. 6/38 vs. 7/35	Final 207/ 206	Final 207/206 prop2s	Error Corr. 38/6 vs. 7/6	Final 208/232	Final 208/232 prop2s	206/238 Age (in Ma)	206/238 Age prop2s (in Ma)	206/238 Age (in Ma)a	206/238 Age prop2s (in Ma)a	Pb206 CPS	Pb207 CPS	U238 CPS
Old Tonalite
BHX_1b_01 - 1	25.042	0.0044	0.0032	0.000574	5.8e-05	0.0039228	0.07	0.045	-0.3987	4.1e-05	5.7e-05	3.7	0.37	3.78179	0.375733	91	4	164000
BHX_1b_01 - 2	10.424	0.0019	0.004	0.00067	0.00012	0.33317	0.012	0.045	0.073026	0.00026	0.00035	4.32	0.77	4.40176	0.78846	105	2.2	182100
BHX_1b_02 - 1	25.042	0.0162	0.0058	0.00065	0.00014	-0.12328	0.2	0.1	0.46465	0.00065	0.0008	4.2	0.93	4.27274	0.920355	64	11.9	89000
BHX_1b_02 - 2	25.042	0.0054	0.0024	0.000591	4.2e-05	0.24312	0.071	0.03	-0.081618	0.00012	0.00014	3.81	0.27	3.88902	0.276676	157	10.8	283500
BHX_1b_03 - 1	25.162	0.0052	0.0027	0.00062	6.7e-05	0.082503	0.072	0.034	0.16599	0.00023	0.00013	4	0.43	4.06606	0.433167	110	6.7	187200
BHX_1b_03 - 2	19.89	0.0039	0.0023	0.000593	7.8e-05	-0.13254	0.037	0.023	0.21763	4.9e-05	9.9e-05	3.82	0.5	3.90646	0.507367	121	5.6	208700
BHX_1b_04 - 1	25.162	0.0035	0.0035	0.000627	7.4e-05	-0.23361	0.057	0.047	0.39867	0.0004	0.00031	4.04	0.47	4.11656	0.486068	93	2.9	155700
BHX_1b_04 - 2	25.042	0.0051	0.0038	0.000584	7.7e-05	-0.098193	0.07	0.053	0.078826	0.00016	0.00024	3.76	0.49	3.84679	0.500746	88	5.4	153100
BHX_1b_05 - 1	25.042	0.0085	0.0037	0.00071	0.0001	-0.062341	0.105	0.047	0.33789	0.0001	0.00015	4.57	0.65	4.65287	0.655489	103	10.3	146500
BHX_1b_05 - 2	25.162	0.003	0.0027	0.000699	9.5e-05	-0.11908	0.04	0.037	0.4374	0.0001	0.00017	4.5	0.61	4.58207	0.61635	107	3.6	168000
BHX_1b_06 - 1	25.042	0.0032	0.0018	0.000548	4.5e-05	-0.20911	0.044	0.027	0.25571	0.000113	7.8e-05	3.53	0.29	3.60717	0.296574	188	7.7	354800
BHX_1b_06 - 2	25.162	0.0026	0.0029	0.000515	7.2e-05	0.096048	0.029	0.044	0.10828	0.0002	0.00029	3.32	0.46	3.40653	0.469741	124	4.7	255300
BHX_1b_07 - 1	17.254	0.0069	0.0052	0.000544	6.4e-05	-0.19243	0.091	0.083	0.2299	0.0001	0.00026	3.51	0.41	3.58817	0.422307	97	8.8	182000
BHX_1b_07 - 2	25.042	-0.0011	0.0028	0.000631	7.9e-05	-0.0054827	-0.001	0.043	0.30583	0.00012	0.00014	4.07	0.51	4.14615	0.519257	101	-0.8	163300
BHX_1b_08 - 1	25.162	0.007	0.0025	0.000701	7.5e-05	0.15896	0.084	0.031	0.14319	0.0001	0.00011	4.52	0.48	4.57717	0.490179	167	12.3	245000
BHX_1b_08 - 2	25.042	0.0092	0.0032	0.00061	0.00011	0.05711	0.115	0.05	-0.0044703	0.00022	0.00025	3.94	0.69	4.01594	0.724271	86	9.3	143100
BHX_1b_09 - 1	25.162	0.0051	0.0029	0.000651	6.1e-05	0.017073	0.053	0.034	0.57469	5e-05	7e-05	4.19	0.39	4.27919	0.401136	159	7.9	265000
BHX_1b_09 - 2	25.042	0.0039	0.0026	0.000614	6.5e-05	-0.057931	0.062	0.04	0.011988	0.000103	9.8e-05	3.96	0.42	4.03322	0.427216	131	7.1	218000
BHX_1b_10 - 1	25.162	0.0024	0.0024	0.000621	8.4e-05	0.23732	0.029	0.033	-0.050715	-6.96e-05	2.7e-06	4	0.54	4.08504	0.552693	110	3.8	183000
BHX_1b_10 - 2	10.784	0.0079	0.0039	0.00061	0.0001	-0.44378	0.109	0.063	0.94687	0	1	3.94	0.65	4.01496	0.658291	120	11.1	192600
BHX_1b_11 - 1	25.042	0.0039	0.002	0.000537	5.6e-05	0.052866	0.065	0.032	0.048359	0.00022	0.00016	3.46	0.36	3.53837	0.369252	169	10.4	338000
BHX_1b_11 - 2	25.162	0.0057	0.0022	0.00058	4.4e-05	-0.37355	0.084	0.034	0.53073	0.00014	0.00013	3.74	0.28	3.8192	0.289998	124.4	8.7	214200
BHX_1b_12 - 1	25.042	0.0051	0.0047	0.000567	9.1e-05	0.12602	0.04	0.11	-0.31534	-0.0001	0.00019	3.65	0.59	3.74041	0.600403	65	3.9	117400
BHX_1b_12 - 2	25.042	0.0045	0.0019	0.000575	6.1e-05	0.11517	0.049	0.022	0.14247	0.00012	0.00011	3.71	0.39	3.78984	0.395622	164	8.5	296000
BHX_1b_13 - 1	25.042	0.004	0.0039	0.000728	9.5e-05	0.055126	0.045	0.047	0.88843	0.00071	0.00081	4.69	0.61	4.77609	0.623359	72	3	107600
BHX_1b_13 - 2	25.162	0.0044	0.003	0.000685	8.3e-05	0.065261	0.051	0.035	0.0097045	0.0001	0.00015	4.41	0.53	4.50071	0.538878	114	4.8	168300
BHX_1b_13 - 3	25.042	0.0089	0.0047	0.000527	8.9e-05	0.25254	0.18	0.1	0.10162	0.00035	0.00026	3.39	0.57	3.48092	0.587963	68	8.5	140900
BHX_1b_13 - 4	6.3503	0.0085	0.0066	0.000588	9.4e-05	-0.19962	0.078	0.064	0.53049	0.00068	0.0005	3.79	0.61	3.87215	0.619132	285	29	550000
BHX_1b_14 - 1	25.042	0.0062	0.0025	0.000635	6.3e-05	0.065885	0.071	0.03	0.0016657	0.0003	0.00022	4.09	0.4	4.17352	0.407687	134	8.6	219100
BHX_1b_14 - 2	25.042	0.0013	0.0019	0.000578	5.9e-05	0.29647	0.017	0.025	0.36434	0.00018	0.00019	3.72	0.38	3.80884	0.38896	125	1.4	223800
BHX_1b_15 - 1	6.7097	0.006	0.005	0.0006	0.00013	0.20388	0.075	0.062	-0.053221	0.00016	0.00022	3.86	0.83	3.94167	0.854161	190	14	375000
BHX_1b_16 - 1	25.042	0.0035	0.0028	0.00058	0.0001	-0.111	0.065	0.054	0.46602	0.00014	0.00018	3.72	0.65	3.81871	0.658519	98	4.6	172200
BHX_1b_16 - 2	25.042	0.005	0.0022	0.000576	4.9e-05	-0.12695	0.077	0.034	0.53322	0.00015	0.00012	3.71	0.31	3.78201	0.315628	179	11.5	328000
BHX_1b_17 - 1	25.042	0.0073	0.0035	0.000655	4.8e-05	-0.021368	0.083	0.039	0.080137	0.00019	0.00012	4.22	0.31	4.28575	0.314664	155	10.4	245100
BHX_1b_17 - 2	25.042	0.0036	0.0027	0.000553	6.3e-05	-0.16827	0.047	0.041	0.46869	0.00026	0.00016	3.56	0.4	3.63129	0.414084	93	2.6	173300
BHX_1b_17 - 3	25.162	0.0018	0.0026	0.000658	7.2e-05	0.18714	0.001	0.029	0.032679	0.00016	0.00025	4.24	0.46	4.32624	0.466939	91	1.2	148300
BHX_1b_18 - 1	25.042	0.005	0.002	0.000572	4.1e-05	-0.35728	0.064	0.027	0.29531	0.00011	0.00011	3.69	0.27	3.77082	0.270516	171	11	287000
BHX_1b_18 - 2	25.042	0.0056	0.0027	0.000544	6.2e-05	-0.32695	0.081	0.039	0.58221	0.00012	0.00014	3.51	0.4	3.59283	0.409603	131	9.9	257000
BHX_1b_19 - 1	25.042	0.0047	0.0025	0.000643	8.4e-05	0.01794	0.062	0.038	0.97167	0.00029	0.00018	4.14	0.54	4.22528	0.552122	142	7.5	226900
BHX_1b_19 - 2	25.042	0.0064	0.0034	0.000486	7.8e-05	0.035241	0.074	0.052	0.4011	3e-05	0.00013	3.13	0.5	3.21766	0.516522	87	6.7	178000
BHX_1b_19 - 3	25.162	0.0053	0.003	0.000641	7.1e-05	0.053251	0.074	0.045	-0.24206	0.00026	0.00029	4.13	0.46	4.22051	0.467577	93	6.1	155200
BHX_1b_20 - 1	25.162	0.002	0.003	0.000573	8.7e-05	0.24017	0.04	0.045	0.36413	0.0002	0.00022	3.7	0.56	3.78304	0.567857	62.8	1.5	113700
BHX_1b_20 - 2	25.042	0.0055	0.0038	0.000616	7e-05	0.068582	0.067	0.05	0.56969	0	1	3.97	0.45	4.06153	0.461617	102	5.2	172200
BHX_1b_21 - 1	25.042	0.0035	0.002	0.000651	8.4e-05	-0.15008	0.056	0.037	0.98023	0.00021	0.00012	4.2	0.54	4.2653	0.54408	159	6.2	258000
BHX_1b_21 - 2	26.599	0.0062	0.0023	0.000511	4.8e-05	0.0034135	0.079	0.032	0.07318	9.5e-05	9.1e-05	3.3	0.31	3.37248	0.317061	108	9.5	221500
BHX_1b_22 - 1	7.4286	0.009	0.0041	0.000649	6.6e-05	0.24676	0.112	0.056	0.44117	2e-05	0.00018	4.18	0.43	4.2609	0.433528	142	16.6	237000
BHX_1s_1 - 1	16.055	0.0077	0.0056	0.00064	0.00013	0.063171	0.074	0.078	0.14375	0.00022	0.00055	4.09	0.81	4.21297	0.855815	93	7.9	155300
BHX_1s_1 - 2	24.682	0.0061	0.0032	0.000673	7.2e-05	0.077296	0.067	0.039	0.13032	0.00016	0.0002	4.34	0.47	4.41698	0.472729	144	9.1	230000
BHX_1s_2 - 1	12.461	0.007	0.0027	0.000642	6.5e-05	0.31711	0.074	0.026	-0.015585	0.00036	0.00018	4.13	0.42	4.22038	0.420891	454	31	747000
BHX_1s_2 - 2	27.318	0.0024	0.0026	0.000618	6.4e-05	0.067018	0.035	0.036	0.39335	0.00038	0.00026	3.98	0.41	4.03771	0.421679	139	4.1	242000
BHX_1s_3 - 1	25.042	0.0042	0.0019	0.000597	4.9e-05	0.28134	0.054	0.024	-0.16382	0.00023	0.00013	3.85	0.32	3.92286	0.322317	258	13.5	464000
BHX_1s_3 - 2	25.042	0.0048	0.0039	0.000541	7e-05	0.15014	0.064	0.066	-0.050265	0.00046	0.00027	3.49	0.45	3.57193	0.462296	99	7.1	177000
BHX_1s_3 - 3	26.12	-0.0021	0.003	0.000503	7.7e-05	-0.045497	-0.004	0.071	-0.76535	-8e-05	0.00034	3.24	0.49	3.33089	0.503359	88	-1.2	192000
BHX_1s_4 - 2	25.162	0.006	0.0027	0.000623	8.9e-05	0.30329	0.08	0.039	0.20574	0	0.00022	4.01	0.57	4.10546	0.586563	106	7.3	184000
BHX_1s_5 - 1	25.042	0.0043	0.0026	0.000587	8.1e-05	-0.035003	0.086	0.048	0.26455	0.00025	0.00026	3.79	0.52	3.8674	0.533779	126	6.7	222000
BHX_1s_5 - 2	17.134	0.0016	0.0039	0.00059	8e-05	-0.0046371	0.007	0.049	-0.036323	-0.0002232	1.1e-05	3.8	0.52	3.88697	0.527164	131	2.6	230000
BHX_1s_6 - 2	26	0.0117	0.0036	0.000628	6.6e-05	0.073882	0.162	0.055	0.58128	0.00019	0.00019	4.05	0.43	4.12878	0.434094	121	16.7	199500
BHX_1s_6 - 3	25.042	0.0041	0.0018	0.00057	3.3e-05	-0.25299	0.067	0.029	0.39822	4.1e-05	7.4e-05	3.67	0.21	3.75664	0.211221	243	12.5	452000
BHX_1s_7 - 1	25.042	0.0026	0.0036	0.000555	6.6e-05	0.0036654	0.038	0.05	0.11134	-0.00013	0.0002	3.57	0.43	3.6643	0.435868	102	3.5	189500
BHX_1s_7 - 2	25.042	0.0029	0.0034	0.000573	6.3e-05	0.12869	0.044	0.043	0.15896	-5.9e-05	2.8e-06	3.69	0.4	3.78132	0.40926	111	3.7	204000
BHX_1s_8 - 1	25.042	0.0056	0.0036	0.00055	8.7e-05	0.13084	0.064	0.049	-0.30068	0.00052	0.00024	3.55	0.56	3.63159	0.57454	108	5.7	207600
BHX_1s_8 - 2	25.162	0.0064	0.0031	0.000686	6.9e-05	0.18463	0.065	0.03	0.21378	-4e-05	0.00015	4.42	0.44	4.50758	0.45351	121	8.3	183600
BHX_1s_9 - 1	23.484	0.0025	0.0017	0.00059	5.3e-05	0.3398	0.03	0.022	-0.002522	9e-05	0.00012	3.8	0.34	3.89007	0.342997	244	8.3	424000
BHX_1s_9 - 2	25.761	0.0085	0.003	0.000556	5.2e-05	-0.18454	0.108	0.039	0.54111	0.00035	0.00021	3.59	0.33	3.66591	0.343059	156	17	291000
BHX_1s_10 - 1	25.042	0.0029	0.0055	0.000553	7.8e-05	0.14894	0.013	0.063	-0.5972	8e-05	0.00035	3.56	0.5	3.64982	0.514911	62.7	2.4	118000
BHX_1s_10 - 2	20.728	0.0064	0.004	0.000561	9.7e-05	-0.21449	0.103	0.072	0.30311	-0.0001842	9.5e-06	3.61	0.63	3.70266	0.640289	88	7.2	156700
BHX_1s_11 - 1	17.973	0.0043	0.0046	0.000571	5e-05	0.024489	0.049	0.05	-0.054417	1e-05	0.00016	3.68	0.32	3.76725	0.330034	116	6.4	212200
BHX_1s_11 - 2	25.042	0.0052	0.0017	0.000603	5.7e-05	-0.12603	0.062	0.022	0.39547	2.8e-05	8e-05	3.89	0.37	3.97157	0.368994	236	13.8	417000
BHX_1s_12 - 1	25.162	0.0037	0.0035	0.000587	6.7e-05	-0.066876	0.057	0.058	0.99986	0.00024	0.0002	3.79	0.43	3.86888	0.441721	106	5.3	192000
BHX_1s_12 - 2	25.042	0.0047	0.0016	0.000594	4.4e-05	0.0069174	0.06	0.019	0.13813	0.00023	0.00011	3.83	0.29	3.91291	0.290056	324	18.1	560000
BHX_1s_13 - 1	25.042	0.0036	0.0015	0.000636	5.6e-05	-0.004096	0.041	0.018	0.34618	9.9e-05	7.3e-05	4.1	0.36	4.16567	0.367247	269	11.7	443000
BHX_1s_13 - 2	20.129	0.0065	0.0036	0.000596	7.4e-05	-0.023369	0.096	0.06	0.33167	7e-05	0.00023	3.84	0.48	3.92387	0.487335	112	9.4	192800
BHX_1s_14 - 1	22.166	0.0053	0.0016	0.000582	4.6e-05	0.28398	0.056	0.019	0.067693	0.00033	0.00014	3.75	0.29	3.81088	0.29541	272	17.6	490000
BHX_1s_14 - 2	25.042	0.0042	0.0011	0.000572	3.7e-05	0.089965	0.049	0.013	0.23611	0.000168	6.6e-05	3.69	0.24	3.74089	0.2366	370	19.6	673000
BHX_1s_15 - 1	27.318	0.0065	0.0018	0.000606	4.6e-05	-0.031823	0.079	0.023	0.21491	7.4e-05	7.4e-05	3.91	0.3	3.98697	0.302894	328	24.8	553000
BHX_1s_15 - 2	25.162	0.0044	0.0016	0.000669	5.1e-05	0.15305	0.048	0.017	0.07582	0.00019	0.00013	4.31	0.33	4.38132	0.327901	238	13.2	405000
BHX_1s_16 - 1	25.042	0.0032	0.002	0.000549	4.7e-05	-0.16185	0.041	0.026	0.28498	0.000103	8.7e-05	3.54	0.3	3.61858	0.310047	187	7.9	328000
BHX_1s_16 - 2	17.254	0.0079	0.0036	0.000581	7.2e-05	0.18373	0.076	0.04	-0.11657	0.00021	0.00018	3.74	0.46	3.82813	0.467949	164	17.4	304000
BHX_1s_17 - 2	22.765	0.0058	0.0021	0.000566	6.9e-05	0.14065	0.073	0.027	0.21973	0.00017	0.00013	3.65	0.44	3.73169	0.455064	196	14.7	366000
BHX_1s_18 - 1	28.277	0.0031	0.0016	0.000652	4.2e-05	0.029705	0.04	0.019	0.23128	4.7e-05	6e-05	4.2	0.27	4.27653	0.275901	288	10.6	455000
BHX_1s_19 - 1	26.48	0.0016	0.0018	0.000553	5.2e-05	-0.19029	0.028	0.028	0.33459	0.0003	0.00016	3.57	0.33	3.64173	0.336138	143	2.7	265800
BHX_1s_19 - 2	25.042	0.0033	0.0014	0.000563	4.2e-05	0.25586	0.037	0.017	-0.086928	0.0001	0.00011	3.63	0.27	3.70899	0.276981	286	12.2	528000
BHX_1s_19 - 3	25.042	0.004	0.0018	0.00057	5.6e-05	-0.048309	0.047	0.024	0.13852	0.00033	0.00015	3.67	0.36	3.75652	0.369247	232	12.4	437000
BHX_1s_20 - 1	25.042	0.0107	0.0075	0.000657	7.1e-05	0.072935	0.095	0.079	-0.13113	0.00015	0.00016	4.23	0.46	4.31652	0.466631	137	19	216000
BHX_1s_20 - 2	25.162	0.0032	0.0027	0.000593	8.2e-05	-0.19574	0.044	0.041	0.32368	0.00017	0.00016	3.82	0.53	3.91044	0.534226	121	3.9	204000
BHX_1s_20 - 3	25.042	0.0034	0.0034	0.000594	6.6e-05	0.063268	0.055	0.046	0.050677	0.00022	0.00017	3.83	0.43	3.91509	0.43513	122	5.3	218000
BHX_1s_21 - 1	23.724	0.0076	0.0035	0.00058	5.3e-05	0.1357	0.101	0.045	0.15446	0.00026	0.00018	3.74	0.34	3.82228	0.349456	116	10.8	212000
BHX_1s_21 - 2	25.162	0.0036	0.0018	0.000578	4.1e-05	0.30344	0.052	0.025	0.020872	0.00018	0.00013	3.73	0.26	3.81412	0.264119	252	12.8	460000
BHX_1s_22 - 1	25.162	0.0058	0.0027	0.000548	7.4e-05	-0.047654	0.077	0.047	0.35396	-4e-05	0.00017	3.53	0.48	3.61018	0.487693	169	12.8	331000
BHX_1s_22 - 2	7.189	0.004	0.0055	0.00053	0.00017	-0.36667	0.15	0.12	0.42508	0.00061	0.00073	3.4	1.1	3.50461	1.12416	111	6.1	242800
BHX_1s_23 - 1	25.042	0.0046	0.0015	0.000586	3.6e-05	-0.014769	0.057	0.02	-0.0020725	0.000148	7.2e-05	3.78	0.23	3.84833	0.236976	328	17.8	591000
BHX_1s_23 - 2	10.065	0.0045	0.0016	0.000611	6.9e-05	0.1474	0.047	0.014	-0.080014	0.00014	0.00016	3.94	0.44	4.019	0.454035	432	22.9	719000
BHX_1s_24 - 1	25.042	0.0055	0.0021	0.000613	4.9e-05	-0.21389	0.083	0.035	0.52716	0.00024	0.00013	3.95	0.32	4.02697	0.322218	232	15.2	418000
BHX_1s_24 - 2	22.046	0.0101	0.0041	0.000712	9.5e-05	-0.16953	0.116	0.065	0.48095	0.00027	0.00026	4.59	0.61	4.67708	0.624127	118	12.6	177000
BHX_1s_25 - 1	25.042	0.0029	0.0042	0.00059	0.0001	0.082146	0.003	0.074	-0.30463	0.00011	0.0003	3.77	0.64	3.89185	0.659701	73	2.6	125100
BHX_1s_26 - 1	22.286	0.0053	0.0017	0.000572	4.4e-05	0.16859	0.066	0.021	-0.039251	0.00038	0.00013	3.69	0.29	3.76249	0.289784	323	21.5	571000
BHX_1s_26 - 2	13.659	0.0012	0.0022	0.000531	6.4e-05	0.14335	0.003	0.02	-0.016156	0.00026	0.00018	3.43	0.41	3.50984	0.416536	188	0.8	378000
BHX_1s_27 - 1	25.042	0.0029	0.0014	0.000543	3e-05	0.10583	0.039	0.019	-0.014717	0.000176	9.9e-05	3.5	0.2	3.57495	0.198058	277	9.6	516000
BHX_1s_28 - 1	25.042	0.0058	0.0031	0.000536	8.2e-05	0.15156	0.044	0.046	0.26315	0.00054	0.00033	3.45	0.53	3.54248	0.542033	93	7.5	185000
BHX_1s_28 - 2	26.36	0.016	0.0048	0.000711	8e-05	0.059538	0.171	0.052	0.43298	0.00046	0.00023	4.58	0.51	4.66013	0.51798	131	22.2	196000
BHX_1s_29 - 1	25.042	0.0051	0.0016	0.000582	3.7e-05	-0.078412	0.066	0.022	0.51958	0.000102	8.8e-05	3.75	0.24	3.83738	0.244176	241	14.4	452000
BHX_1s_29 - 2	25.042	0.0046	0.0019	0.000549	5.7e-05	-0.00099451	0.062	0.025	-0.20776	-4.5e-05	7.7e-05	3.54	0.36	3.62458	0.369865	146	9.8	303000
BHX_1s_30 - 1	13.899	-0.0003	0.0026	0.000538	9.3e-05	-0.24256	-0.001	0.047	0.26863	0	1	3.47	0.6	3.55151	0.614025	106	-0.4	218000
BHX_1s_30 - 2	4.4332	0.0101	0.0032	0.00057	0.00017	-0.31389	0.17	0.13	0.95214	0.0008	0.0011	3.7	1.1	3.76208	1.12206	170	21.2	345000
BHX_1s_32 - 1	25.042	0.0052	0.003	0.000562	5.5e-05	0.065725	0.048	0.034	0.27553	9.7e-05	7.3e-05	3.62	0.36	3.70396	0.362688	154	10.1	279000
BHX_1s_32 - 2	21.687	0.0026	0.0015	0.000507	5.7e-05	0.0071375	0.039	0.023	0.12282	0.00026	0.0002	3.27	0.37	3.35195	0.377008	184	6.7	393000
BHX_1s_33 - 1	20.848	0.0028	0.0023	0.000539	6e-05	0.13326	0.036	0.032	-0.032307	0.00024	0.00014	3.48	0.38	3.55292	0.395721	188	7.5	361000
BHX_1s_33 - 2	20.489	0.0202	0.0042	0.000679	6.8e-05	0.04987	0.228	0.054	0.2778	0.00064	0.0003	4.37	0.44	4.45678	0.446517	165	37	241000
BHX_1s_33 - 3	28.157	0.006	0.0016	0.000575	3.6e-05	-0.13661	0.084	0.024	0.38498	0.0002	0.00012	3.71	0.23	3.79445	0.237755	251	19.3	464000
BHX_1s_34 - 1	25.042	0.0057	0.0028	0.000661	6.5e-05	-0.13417	0.073	0.034	0.53023	0.00044	0.00019	4.26	0.42	4.3448	0.420825	167	11	268000
BHX_1s_34 - 2	20.249	0.003	0.0026	0.000621	6.2e-05	-0.080539	0.037	0.035	0.36729	-1e-05	0.00011	4	0.4	4.09459	0.408883	165	6.6	287000
BHX_1s_34 - 3	27.678	0.0178	0.0039	0.000663	6.4e-05	0.36507	0.213	0.047	0.35968	0.00051	0.00029	4.28	0.41	4.3633	0.421291	182	36.3	278800
BHX_1s_35 - 1	25.042	0.0048	0.002	0.000643	8.5e-05	0.18355	0.061	0.028	0.24879	0.00018	0.00018	4.14	0.55	4.22133	0.558206	125	7.1	208300
BHX_1s_35 - 2	25.042	0.0027	0.0013	0.000632	4.9e-05	0.1996	0.032	0.014	0.031944	0.000145	6.6e-05	4.07	0.31	4.1465	0.315312	283	8.7	479000
BHX_1s_36 - 1	25.042	0.0036	0.0013	0.000576	3.4e-05	-0.0066245	0.05	0.018	0.11337	0.000165	6.3e-05	3.71	0.22	3.78193	0.223891	421	20.1	788000
BHX_1s_36 - 2	25.162	0.009	0.0037	0.000599	8.1e-05	-0.018183	0.121	0.053	0.46975	0.00034	0.00029	3.86	0.52	3.95531	0.534908	83	9.2	147700
BHX_1s_37 - 1	26.36	0.0098	0.0038	0.000648	9.5e-05	0.18413	0.116	0.046	0.047922	-1e-05	0.00019	4.17	0.61	4.26591	0.625473	111	11.5	167600
BHX_1s_38 - 1	25.042	0.003	0.0024	0.000601	6e-05	-0.073084	0.045	0.033	0.36151	0.0004	0.00019	3.87	0.38	3.9571	0.388636	151	4.1	264000
BHX_1s_38 - 2	25.042	0.0032	0.0032	0.000644	8e-05	-0.29516	0.039	0.046	0.3302	0.00029	0.0002	4.15	0.52	4.24332	0.527183	121	4.5	198300
BHX_1s_39 - 1	10.065	0.0066	0.0062	0.000641	8.1e-05	0.21036	0.072	0.077	-0.23305	0.00018	0.00036	4.13	0.52	4.22061	0.533419	160	11	282000
BHX_1s_39 - 2	25.042	0.0043	0.002	0.000526	5.5e-05	-0.0019397	0.061	0.028	0.30691	0.00013	0.00011	3.39	0.36	3.47989	0.363976	155	8.3	313000
BHX_1s_40 - 1	7.9079	0.0099	0.0059	0.00071	0.00014	-0.13532	0.106	0.065	0.43307	0.00039	0.0004	4.59	0.89	4.66898	0.920682	120	12	167000
BHX_1s_40 - 2	25.042	0.0036	0.0027	0.000585	6.3e-05	-0.055022	0.056	0.045	-0.20655	0.00017	0.00016	3.77	0.41	3.86377	0.41617	108	4.9	190700
BHX_1s_41 - 1	25.162	0.0036	0.0013	0.000531	3.7e-05	0.0033542	0.045	0.017	0.22828	0.00028	0.00011	3.42	0.24	3.50676	0.238001	333	15.2	655000
BHX_1s_42 - 1	25.042	0.0042	0.0023	0.000585	4.6e-05	-0.17096	0.056	0.033	0.76167	0.00031	0.00022	3.77	0.3	3.86156	0.303764	193	7.5	341000
BHX_1s_42 - 2	25.162	0.003	0.002	0.000645	6.5e-05	-0.21118	0.04	0.025	0.092448	0.00029	0.0002	4.16	0.42	4.25054	0.428421	245	8.6	403000
BHX_1s_43 - 1	25.042	0.0002	0.0029	0.00058	5e-05	-0.083047	0.01	0.041	0.0097568	-0.00015	0.00011	3.73	0.32	3.8285	0.330161	134	0.7	242000
BHX_1s_43 - 2	25.042	0.0051	0.0019	0.000592	4.3e-05	-0.051593	0.057	0.023	0.25021	0.0002	0.00012	3.81	0.28	3.90977	0.284084	192	11.8	351000
BHX_1s_46 - 1	25.162	0.0086	0.0035	0.000587	6.2e-05	0.30351	0.105	0.046	0.038799	0.00027	0.00015	3.78	0.4	3.87199	0.402481	131	12.8	230900
BHX_1s_46 - 2	25.042	0.002	0.0017	0.000469	4.5e-05	-0.075011	0.035	0.028	0.46244	0.00016	0.00011	3.02	0.29	3.11428	0.298921	143	4.6	321000
BHX_1s_47 - 1	25.042	0.0027	0.0017	0.000563	5e-05	-0.078165	0.039	0.025	0.25868	1.5e-05	8.3e-05	3.63	0.32	3.70917	0.323068	168	6	317000
BHX_1s_47 - 2	25.042	0.0026	0.0043	0.00058	0.00011	0.038393	0.013	0.072	0.18084	3e-05	0.00025	3.73	0.68	3.82991	0.72641	69	2.4	125800
BHX_1s_48 - 1	25.162	0.0056	0.0024	0.000606	6.8e-05	0.14679	0.071	0.031	0.24052	0.00016	0.00017	3.91	0.44	3.99273	0.448143	124	7.7	227000
BHX_1s_48 - 2	25.042	0.0032	0.0016	0.000581	5e-05	0.34453	0.038	0.019	-0.13376	-1.8e-05	4.5e-05	3.74	0.32	3.83173	0.329906	260	10.2	464000
BHX_1s_49 - 1	25.042	0.004	0.0031	0.000585	6.5e-05	-0.17732	0.046	0.041	0.592	0.00038	0.00023	3.77	0.42	3.85696	0.422083	97	4.5	184000
BHX_1s_49 - 2	25.042	0.0044	0.0019	0.000593	5.1e-05	0.018137	0.049	0.023	0.052263	2.2e-05	4.4e-05	3.82	0.33	3.90548	0.33608	190	10.2	339300
BHX_1s_50 - 1	25.042	0.0026	0.0036	0.00061	0.00012	-0.32962	0.12	0.13	0.1107	0.00016	0.00022	3.94	0.75	4.01729	0.790358	64	2.2	108000
BHX_1s_52 - 1	16.535	0.0074	0.0058	0.00062	0.00015	0.21424	0.13	0.12	0.75324	0.00013	0.00025	4.01	0.99	4.07865	0.98684	64	5.9	102200
BHX_1s_52 - 2	25.042	0.007	0.0051	0.00058	0.00011	0.16805	0.1	0.085	0.34088	0.00034	0.00029	3.75	0.69	3.82017	0.724615	70	6.3	123000
BHX_1s_53 - 1	25.042	0.0033	0.003	0.00058	6.1e-05	0.38854	0.034	0.036	-0.034083	0.0006	0.00025	3.74	0.4	3.80004	0.400171	160	6.9	292000
BHX_1s_53 - 2	25.042	0.0038	0.0015	0.000533	4.3e-05	0.48256	0.042	0.018	-0.21074	0.000175	9.4e-05	3.43	0.28	3.50541	0.283298	281	12.5	559000
BHX_1s_54 - 1	25.042	0.0043	0.0024	0.000545	6.5e-05	-0.087231	0.074	0.041	0.46436	0.00041	0.00025	3.51	0.42	3.59618	0.422456	126	6.7	244000
BHX_1s_54 - 2	25.162	0.0039	0.0015	0.000583	6.1e-05	-0.12614	0.059	0.023	0.32995	7e-05	0.0001	3.76	0.39	3.83887	0.401853	199	10.2	383000
BHX_1s_55 - 1	4.6729	0.0036	0.0056	0.000758	8.3e-05	0.41362	0.028	0.068	-0.53772	-0.0001348	6.4e-06	4.89	0.54	4.94944	0.542305	139	5.1	215100
BHX_1s_56 - 1	6.8296	0.0083	0.0066	0.00063	0.00017	-0.18364	0.089	0.085	0.64397	-3e-05	0.00035	4.1	1.1	4.13807	1.11671	121	11.4	186800
BHX_1s_57 - 1	25.042	0.0085	0.0046	0.000648	9.1e-05	0.19352	0.099	0.061	0.35771	0.00024	0.00023	4.17	0.58	4.25456	0.591069	84	9	131000
BHX_1s_57 - 2	25.042	0.0046	0.0022	0.000589	5.1e-05	0.067739	0.052	0.028	-0.1436	0.00017	0.00014	3.8	0.33	3.87325	0.335668	192	10.9	342000
BHX_1s_58 - 1	25.761	0.0084	0.0034	0.00057	5.6e-05	0.058103	0.115	0.049	-0.081486	0.00027	0.00011	3.67	0.36	3.72817	0.360491	251	29	493000
BHX_1s_58 - 2	25.042	0.0079	0.0027	0.000652	6.8e-05	-0.023245	0.089	0.031	0.32039	0.00012	0.00012	4.2	0.44	4.27962	0.446559	175	15.6	285000
BHX_1s_59 - 1	25.042	0.0015	0.0019	0.000534	6.5e-05	0.18388	0.02	0.031	-0.24216	3e-05	0.00014	3.44	0.42	3.52096	0.42878	122	2.4	241300
BHX_1s_59 - 2	25.042	0.0041	0.0026	0.0006	8.9e-05	-0.10505	0.074	0.054	0.99506	-5.19e-05	6.1e-06	3.86	0.57	3.9429	0.585045	112	5.6	203000
BHX_1s_60 - 1	25.042	0.0046	0.0023	0.000603	5.4e-05	0.19417	0.058	0.031	0.0025147	0.00025	0.00014	3.89	0.35	3.93711	0.353455	190	9.9	344000
BHX_1s_60 - 2	24.922	0.0099	0.0026	0.000674	6.2e-05	0.090122	0.108	0.03	0.55928	0.00013	0.00015	4.34	0.4	4.42208	0.400453	151	15.9	236000
BHX_1s_60 - 3	25.162	0.0141	0.0038	0.000697	6.5e-05	-0.043609	0.186	0.054	0.17813	0.00072	0.00033	4.49	0.42	4.56139	0.425733	168	25.1	261000
BHX_1s_61 - 1	25.162	0.0002	0.0017	0.000629	5.9e-05	-0.10985	0.007	0.024	0.31657	0.00018	0.00013	4.05	0.38	4.1259	0.387345	149	0.4	252900
BHX_1s_61 - 2	25.042	0.0003	0.0021	0.000674	9.3e-05	-0.12138	0.022	0.032	0.37163	0.00029	0.0003	4.34	0.6	4.42471	0.610664	105	0.4	165100
BHX_1s_62 - 1	25.042	0.0073	0.0037	0.000656	7.1e-05	-0.074688	0.073	0.037	0.56464	0.00023	0.00018	4.23	0.46	4.29426	0.458601	111	8.1	181300
BHX_1s_62 - 2	25.042	0.0056	0.0021	0.000619	5.8e-05	-0.15888	0.074	0.032	0.91319	0.00024	0.0002	3.99	0.38	4.07226	0.381752	176	10.1	279000
BHX_1s_63 - 1	25.042	0.0083	0.0025	0.000659	6.4e-05	-0.1569	0.086	0.029	0.34424	0.00014	0.00014	4.25	0.41	4.3219	0.420001	177	15.7	303000
BHX_1s_64 - 1	25.042	0.0044	0.0015	0.000629	4.1e-05	0.0080848	0.052	0.018	0.49305	4.4e-05	6e-05	4.06	0.26	4.11715	0.262564	233	11.9	401000
BHX_1s_64 - 2	25.042	-0.0027	0.0032	0.000557	8.1e-05	-0.11604	-0.01	0.075	-0.42649	0.00015	0.00022	3.59	0.52	3.67258	0.534202	104	-3.6	192500
BHX_1s_65 - 1	10.784	0.0049	0.004	0.0007	0.00015	0.54342	0.055	0.043	-0.24947	0.00026	0.00028	4.52	0.94	4.58977	0.983619	131	8.2	213800
BHX_1s_65 - 2	25.162	0.0067	0.0016	0.000584	4.1e-05	-0.011779	0.087	0.021	0.020886	0.000102	6.3e-05	3.77	0.26	3.83726	0.269844	334	27.4	606000
BHX_1s_66 - 1	25.162	0.0029	0.0017	0.000591	5.8e-05	0.079315	0.041	0.023	0.099007	0.00012	0.0001	3.81	0.37	3.87518	0.374205	195	6.6	350000
BHX_1s_66 - 2	25.162	0.0068	0.003	0.000624	7.1e-05	0.042363	0.083	0.036	0.34303	-1e-05	8.5e-05	4.02	0.46	4.10362	0.467076	116	9.4	198300
BHX_1s_67 - 1	25.042	0.0021	0.0015	0.000603	5.8e-05	0.047948	0.024	0.018	0.23729	9e-05	0.00012	3.88	0.37	3.96299	0.374881	217	6.3	381000
BHX_1s_67 - 2	25.042	0.0044	0.0016	0.000539	3.7e-05	-0.24922	0.064	0.022	0.21751	0.00017	0.00011	3.47	0.24	3.55245	0.244226	281	15.4	547000
BHX_1s_68 - 2	25.042	0.0052	0.0041	0.00055	0.00011	-0.010745	0.12	0.11	0.79454	0.00011	0.00015	3.57	0.71	3.62609	0.725323	68	4.4	126700
BHX_1s_69 - 1	25.162	0.0031	0.0018	0.000549	4.7e-05	-0.1048	0.038	0.024	0.2203	0.0003	0.00016	3.54	0.3	3.61338	0.309697	160	6.4	309600
BHX_1s_69 - 2	8.507	0.0093	0.0078	0.00052	0.00013	-0.19669	0.1	0.12	0.33963	0.00076	0.00069	3.33	0.84	3.42785	0.857079	71	9.1	139200
BHX_1s_70 - 1	7.0692	0.0084	0.0044	0.000625	0.0001	-0.21676	0.105	0.056	0.098872	0.0002	0.00013	4.03	0.64	4.10259	0.650026	302	29	476200
BHX_1s_70 - 2	25.042	0.0038	0.0019	0.000572	5.3e-05	-0.16237	0.048	0.027	0.48617	8e-05	0.00014	3.69	0.34	3.77362	0.349798	163	7.6	298000
BHX_1s_71 - 1	25.042	0.0045	0.0026	0.000571	5.9e-05	0.23942	0.059	0.039	-0.03704	1e-05	0.0001	3.68	0.38	3.76058	0.388777	180	11.4	333000
BHX_1s_71 - 2	25.042	0.0036	0.002	0.000608	5.4e-05	-0.099449	0.054	0.03	0.19527	2e-05	7.5e-05	3.92	0.35	4.00099	0.355552	166	7.2	288300
BHX_1s_72 - 1	25.042	0.0061	0.0021	0.000585	6e-05	-0.0045041	0.078	0.027	0.20638	7.7e-05	8.7e-05	3.77	0.39	3.85872	0.395882	202	16.4	367000
BHX_1s_72 - 2	19.89	0.0042	0.0016	0.00055	4.4e-05	0.26387	0.05	0.019	-0.080898	5.2e-05	6.8e-05	3.54	0.28	3.62414	0.283643	277	14.9	559000
BHX_1s_73 - 1	25.162	0.0068	0.0024	0.00066	6.4e-05	-0.015364	0.08	0.031	0.15475	0.00015	0.00012	4.25	0.41	4.33793	0.4208	197	15	323000
BHX_1s_73 - 2	25.042	0.0036	0.0026	0.000567	6.2e-05	-0.0093441	0.052	0.036	0.23064	0.00021	0.00012	3.65	0.4	3.73232	0.401769	174	7.3	320000
BHX_1s_74 - 1	25.042	0.0043	0.0029	0.000621	8.4e-05	-0.087022	0.071	0.041	0.41661	0.00037	0.00024	4	0.54	4.07772	0.551774	128	6.2	220000
BHX_1s_74 - 2	11.982	0.008	0.0041	0.000692	9.4e-05	-0.067155	0.081	0.049	0.27531	0	1	4.46	0.61	4.54327	0.617261	174	15.1	294000
BHX_1s_75 - 1	25.162	0.0076	0.0032	0.000611	6.7e-05	-0.094105	0.096	0.044	0.13636	0.00042	0.00025	3.94	0.43	4.01805	0.440792	119	10.7	206200
BHX_1s_75 - 2	25.042	0.0057	0.003	0.000583	6.3e-05	0.2224	0.059	0.037	0.13525	0.00022	0.00026	3.76	0.41	3.84462	0.415578	126	8.9	227600
BHX_1s_76 - 1	24.682	0.0083	0.0027	0.00061	7.9e-05	-0.17813	0.106	0.037	0.74005	0.00011	0.00015	3.93	0.51	4.01112	0.519636	144	14	258000
BHX_1s_76 - 2	25.042	0.002	0.003	0.000588	8.2e-05	-0.25814	0.03	0.04	0.31728	0.00038	0.00027	3.79	0.53	3.8772	0.540788	107	2	201000
BHX_1s_77 - 1	25.162	0.0054	0.0028	0.000682	8.1e-05	-0.32454	0.087	0.053	-0.33909	0.00015	0.00017	4.4	0.52	4.48079	0.532289	167	9.7	259000
BHX_1s_77 - 2	25.042	0.0036	0.0016	0.000546	4.3e-05	-0.11812	0.034	0.017	0.12189	0.000109	7.3e-05	3.52	0.28	3.60015	0.283796	315	15	598000
BHX_1s_78 - 2	25.042	0.0001	0.0066	0.0005	0.00012	0.13451	0.1	0.17	-0.35826	0	1	3.23	0.77	3.31321	0.795217	34.8	-0.5	69600
BHX_1s_78 - 3	25.042	0.0021	0.004	0.000622	9.8e-05	-0.15608	0.062	0.092	0.53586	0	0.00019	4.01	0.63	4.08952	0.644454	68	1.7	114200
BHX_1s_79 - 1	25.162	0.0053	0.0028	0.00064	9e-05	-0.065141	0.09	0.054	0.51271	0	1	4.12	0.58	4.21313	0.592551	92	6.6	162000
BHX_1s_79 - 2	25.042	0.0048	0.0019	0.00053	6.1e-05	0.039215	0.061	0.027	0.3054	0.000125	9.8e-05	3.42	0.4	3.50153	0.403143	155	11.2	328000
BHX_1s_80 - 1	23.724	0.0068	0.0025	0.000563	5.9e-05	-0.1162	0.1	0.038	0.97147	0.00011	0.00013	3.63	0.38	3.70717	0.382146	133	11.2	259000
BHX_1s_80 - 2	25.162	0.0071	0.002	0.000614	7.1e-05	-0.13688	0.1	0.037	0.83731	1e-05	0.0002	3.96	0.46	4.04347	0.467685	127	10.9	219300
BHX_1s_81 - 1	25.042	0.006	0.0024	0.000645	5.8e-05	0.13002	0.074	0.03	0.00083262	0.00023	0.00012	4.16	0.37	4.21943	0.37342	153	10.1	243900
BHX_1s_81 - 2	25.042	0.0048	0.002	0.000589	5.7e-05	0.016802	0.056	0.025	0.015342	0.00011	0.00012	3.8	0.37	3.88341	0.375947	185	9.9	335000
BHX_1s_82 - 2	25.042	0.0045	0.003	0.00064	8.8e-05	-0.020134	0.051	0.043	0.16104	5e-05	0.00016	4.12	0.57	4.21049	0.579041	104	5.4	178000
BHX_1s_83 - 1	25.042	0.0032	0.0014	0.000629	4.5e-05	0.2098	0.038	0.017	-0.017097	0.00026	0.00015	4.05	0.29	4.13271	0.295966	216	8.6	360000
BHX_1s_83 - 2	26.959	0.0078	0.0019	0.000585	4.3e-05	-0.16841	0.101	0.027	0.59444	0.00016	0.00012	3.77	0.28	3.857	0.283691	158	15.3	282000
BHX_1s_84 - 1	11.383	0.0026	0.0033	0.000611	9.8e-05	-0.13889	0.017	0.03	-0.16503	0.00024	0.00028	3.94	0.63	4.02004	0.644899	153	4.4	277000
BHX_1s_84 - 2	25.042	0.0045	0.0023	0.00056	8.3e-05	0.13847	0.068	0.035	-0.040314	0.00041	0.0003	3.61	0.53	3.69438	0.547666	104	5.1	186000
BHX_1s_85 - 1	14.019	0.0051	0.0023	0.000506	8.9e-05	0.25012	0.065	0.03	0.23096	-0.00011	0.0001	3.26	0.57	3.34247	0.588031	204	15.4	426000
BHX_1s_85 - 2	25.042	-0.0026	0.0031	0.000556	7.3e-05	-0.14374	-0.043	0.045	0.55682	0.00059	0.0005	3.58	0.47	3.67318	0.475749	69.5	-2.3	132500
BHX_1s_86 - 1	25.042	0.0045	0.0025	0.0006	5.9e-05	0.1522	0.052	0.03	0.18204	7.2e-05	8e-05	3.87	0.38	3.94471	0.388142	150	7.8	254800
BHX_1s_86 - 2	25.162	0.004	0.002	0.000571	4.9e-05	0.11267	0.045	0.026	0.11861	0.00016	0.00013	3.68	0.32	3.76798	0.323494	217	12.4	411000
BHX_1s_87 - 1	25.042	0.0023	0.0013	0.000545	4.4e-05	-0.13134	0.029	0.019	0.36473	0.000152	8.9e-05	3.51	0.28	3.5771	0.289426	330	11.5	633800
BHX_1s_87 - 2	25.042	0.0039	0.0021	0.000633	4.6e-05	-0.071255	0.048	0.026	0.12064	9e-05	0.00012	4.08	0.29	4.16005	0.296014	167	7.9	288000
BHX_1s_88 - 1	25.042	0.0016	0.0028	0.000573	7.3e-05	-0.13657	0.036	0.046	0.16075	0	1	3.69	0.47	3.78098	0.481793	87	2.1	164000
BHX_1s_88 - 2	25.042	0.0042	0.0027	0.000674	6.2e-05	-0.12246	0.031	0.03	0.02773	0.00019	0.00018	4.34	0.4	4.42914	0.407576	139	4.6	217000
Intermediate Tonalite
BHX_2b_01 - 1	25.042	0.0048	0.0021	0.000598	6e-05	-0.093737	0.075	0.039	0.35852	0.00021	0.00012	3.85	0.39	3.92817	0.394426	143	7.9	245000
BHX_2b_01 - 2	17.853	0.0048	0.0027	0.00055	5.8e-05	-0.08001	0.052	0.034	0.24568	-5e-05	0.00013	3.54	0.37	3.63642	0.376956	194	10.6	381000
BHX_2b_02 - 1	25.162	0.0082	0.0028	0.000652	8.9e-05	-0.026153	0.096	0.04	0.36223	0.00015	0.00027	4.2	0.57	4.29355	0.586146	100	7.7	144500
BHX_2b_02 - 2	25.162	0.003	0.0016	0.000588	5.1e-05	0.2369	0.036	0.02	0.26144	0.0002	0.00014	3.79	0.33	3.86933	0.335857	307	13	539000
BHX_2b_02 - 3	25.042	0.0043	0.002	0.000593	4.8e-05	0.007089	0.053	0.027	-0.10324	0.00028	0.00017	3.82	0.31	3.91361	0.316895	255	13.3	434000
BHX_2b_03 - 1	25.162	0.007	0.0021	0.000684	7.6e-05	-0.0075372	0.088	0.03	0.65387	0.0002	0.00013	4.41	0.49	4.47515	0.491038	166	12.5	250000
BHX_2b_03 - 2	25.162	0.0034	0.001	0.000535	3.3e-05	0.15197	0.049	0.016	0.099445	8.8e-05	9.2e-05	3.45	0.21	3.54067	0.218539	329	16.4	644000
BHX_2b_04 - 1	25.042	0.0051	0.0024	0.000577	6.2e-05	-0.065807	0.062	0.03	0.15203	0.00029	0.00019	3.72	0.4	3.79881	0.401812	173	10.4	321000
BHX_2b_04 - 2	25.042	0.0036	0.0032	0.000554	6.4e-05	-0.1328	0.066	0.056	0.089611	0.00042	0.00028	3.57	0.41	3.65996	0.42291	135	6.4	251900
BHX_2b_04 - 3	25.042	0.0047	0.0022	0.000577	6.2e-05	-0.16767	0.083	0.042	0.58533	0.00027	0.00028	3.72	0.4	3.81066	0.409548	119	6.7	214000
BHX_2b_05 - 1	25.401	0.0141	0.005	0.000742	7.9e-05	0.23864	0.143	0.052	0.17756	0.00038	0.00019	4.78	0.51	4.85298	0.516963	156	21.2	226000
BHX_2b_05 - 2	25.162	0.0065	0.0033	0.000603	6.9e-05	0.19905	0.08	0.041	0.18831	0.00033	0.00024	3.89	0.44	3.96887	0.454305	94	7.2	168000
BHX_2b_05 - 3	25.042	0.0054	0.0023	0.000581	6.3e-05	0.022271	0.075	0.031	0.08064	-6e-05	0.00017	3.75	0.41	3.83434	0.415871	172	11.4	307000
BHX_2b_06 - 1	25.042	0.0056	0.0021	0.000626	5.1e-05	0.3428	0.062	0.025	-0.12576	6.2e-05	5.9e-05	4.04	0.33	4.11413	0.335433	205	12.1	341000
BHX_2b_06 - 2	25.042	0.003	0.0018	0.000609	6.1e-05	0.094736	0.033	0.024	0.061534	0	0.0001	3.92	0.39	4.01601	0.402354	189	7.3	330000
BHX_2b_07 - 1	25.162	0.0036	0.0013	0.000565	3.9e-05	-0.026988	0.044	0.016	0.35068	0.000146	7.4e-05	3.64	0.25	3.72697	0.25748	381	17.9	700000
BHX_2b_07 - 2	25.042	0.00397	0.00085	0.000541	3.1e-05	0.029088	0.054	0.012	0.16678	0.00018	6.3e-05	3.49	0.2	3.56425	0.204703	558	30.1	1070000
BHX_2b_08 - 1	25.042	0.0043	0.0022	0.000746	6e-05	0.030163	0.04	0.022	0.027654	0.00018	0.00012	4.81	0.38	4.88992	0.386934	176	7.3	245000
BHX_2b_08 - 2	25.042	0.0052	0.0029	0.000653	7.1e-05	0.18531	0.07	0.041	0.97112	0.00027	0.00024	4.21	0.46	4.2949	0.467099	119	5.9	183300
BHX_2b_09 - 1	25.042	0.0047	0.0023	0.000629	7.9e-05	0.44671	0.068	0.031	0.52259	4e-05	0.00013	4.05	0.51	4.1428	0.520407	142	9	234000
BHX_2b_09 - 2	25.042	0.0029	0.0024	0.000516	6.3e-05	0.244	0.051	0.039	0.11587	7.6e-05	8.6e-05	3.33	0.41	3.4164	0.417205	149	8	307000
BHX_2b_10 - 2	25.042	0.0027	0.0015	0.000556	7.2e-05	0.22393	0.033	0.021	-0.04273	0.0002	0.00019	3.58	0.46	3.6759	0.476083	117	4.1	219800
BHX_2b_11 - 1	25.042	0.0082	0.0039	0.00064	7.4e-05	-0.14366	0.107	0.053	0.088443	0.00021	0.00013	4.12	0.48	4.19711	0.485555	113	10.6	183000
BHX_2b_11 - 2	25.042	0.004	0.0035	0.000712	8.6e-05	-0.013333	0.056	0.049	0.63504	0.00036	0.00037	4.59	0.55	4.67383	0.558083	127	5.2	184000
BHX_2b_12 - 1	25.162	0.004	0.0026	0.000596	7.8e-05	-0.23659	0.054	0.039	-0.042419	0.00051	0.00037	3.84	0.5	3.93014	0.514433	101	4	179000
BHX_2b_12 - 2	25.042	0.0049	0.002	0.000575	4.6e-05	-0.25461	0.076	0.035	0.67942	0.00023	0.00019	3.71	0.29	3.79494	0.297141	165	8.5	299000
BHX_2b_13 - 1	25.042	0.0089	0.0037	0.000586	7.6e-05	0.018284	0.101	0.052	0.46589	0.00012	0.00013	3.78	0.49	3.85979	0.494138	93	9.1	163000
BHX_2b_14 - 1	25.042	0.0044	0.002	0.000625	5e-05	0.066036	0.051	0.022	-0.028606	0.00016	0.00011	4.03	0.32	4.11037	0.322477	198	9.6	340000
BHX_2b_14 - 2	25.042	0.0065	0.0037	0.000584	7.1e-05	0.22179	0.066	0.049	-0.18513	0.00033	0.00025	3.76	0.46	3.85242	0.468457	87	7.9	157100
BHX_2b_15 - 1	25.162	0.006	0.0033	0.000578	7e-05	-0.24702	0.083	0.048	0.38347	4e-06	0.00016	3.73	0.45	3.81728	0.462373	127	10.9	228000
BHX_2b_15 - 2	25.042	-0.0014	0.0032	0.000586	7.1e-05	-0.071302	-0.008	0.047	0.080349	0.00044	0.00026	3.78	0.46	3.86251	0.468103	114	-1.9	201000
BHX_2b_17 - 1	25.042	0.0064	0.0026	0.000594	5.9e-05	-0.0055329	0.073	0.034	0.11797	0.00016	0.00018	3.83	0.38	3.91768	0.382646	140	10.5	273000
BHX_2b_17 - 2	25.042	0.0051	0.0016	0.000525	4e-05	0.12353	0.061	0.018	0.14111	0.000124	9e-05	3.38	0.26	3.45948	0.263976	236	14.7	450600
BHX_2b_18 - 1	25.162	0.0039	0.0014	0.000539	3.5e-05	0.14029	0.053	0.018	-0.041728	0.000146	7.9e-05	3.48	0.23	3.54807	0.230892	326	17.1	619000
BHX_2b_18 - 2	25.042	0.0035	0.0014	0.00055	3.7e-05	-0.33741	0.047	0.021	0.67026	0.00019	0.0001	3.55	0.24	3.62408	0.237573	314	12.7	597000
BHX_2b_19 - 1	25.162	0.0043	0.0039	0.000639	7.7e-05	-0.047235	0.053	0.047	0.33662	0.00028	0.00022	4.12	0.5	4.19629	0.505843	93	4.5	152000
BHX_2b_19 - 2	25.162	0.0056	0.0022	0.000539	6.9e-05	-0.090807	0.079	0.035	0.67327	-2e-06	8e-05	3.48	0.45	3.56293	0.456201	132	8.3	264000
BHX_2b_20 - 2	25.042	0.0079	0.0027	0.000589	8.2e-05	0.73974	0.1	0.03	0.12756	0.00011	0.00012	3.79	0.53	3.88578	0.541051	144	12.5	273000
BHX_2b_21 - 1	25.042	0.0047	0.0029	0.000581	6e-05	0.16305	0.053	0.036	-0.1124	-0.000154	6.9e-05	3.75	0.38	3.83367	0.389416	134	6.8	243500
BHX_2b_21 - 2	25.162	0.0042	0.0018	0.000516	4.9e-05	0.30912	0.061	0.027	-0.12501	9e-05	7.1e-05	3.32	0.32	3.41298	0.32425	234	14	485000
BHX_2b_22 - 1	25.162	0.0053	0.0017	0.000661	4.9e-05	-0.34318	0.069	0.024	0.70814	0.00013	0.00011	4.26	0.32	4.34883	0.322524	211	11.8	345000
BHX_2b_22 - 2	25.162	0.0029	0.0016	0.000556	4e-05	-0.064662	0.053	0.026	0.43622	-8.88e-05	2.8e-06	3.58	0.26	3.66104	0.263744	233	8.7	424800
BHX_2b_23 - 1	25.042	0.0043	0.0025	0.00056	6.7e-05	-0.19443	0.051	0.047	0.0071642	0.00019	0.00015	3.61	0.43	3.68571	0.441199	162	9.5	300000
BHX_2b_23 - 2	25.042	0.004	0.002	0.000564	5.6e-05	0.31392	0.043	0.023	-0.2297	0.00035	0.00017	3.64	0.36	3.72244	0.369737	202	10.1	375000
BHX_2b_24 - 1	25.042	0.0037	0.003	0.000612	8.8e-05	0.22283	0.027	0.036	-0.25238	2e-05	0.00022	4.04	0.59	4.03269	0.579945	100	4.3	165300
BHX_2b_24 - 2	3.954	0.0051	0.0088	0.0006	0.00022	-0.28305	0.12	0.19	0.52782	0.0017	0.0014	3.8	1.4	3.95657	1.45077	90	5.5	144600
BHX_2b_25 - 1	25.042	0.0024	0.0013	0.000609	5e-05	-0.066552	0.029	0.016	0.064565	0.000149	6.9e-05	3.93	0.32	3.97794	0.327476	321	9.7	546000
BHX_2b_25 - 2	25.042	0.0047	0.0013	0.000537	4.8e-05	0.090265	0.062	0.016	0.22811	0.0002	0.00012	3.46	0.31	3.54216	0.316857	347	22	688000
BHX_2b_26 - 1	25.162	0.0051	0.003	0.00052	3.9e-05	-0.081719	0.079	0.051	0.17566	0.00051	0.0003	3.35	0.25	3.43001	0.257597	163	11	327000
BHX_2b_26 - 2	25.042	0.0039	0.0024	0.000562	5.7e-05	-0.14281	0.049	0.033	0.063376	0.00027	0.00023	3.62	0.36	3.70313	0.369204	154	7.6	282300
BHX_2s_01 - 1	25.042	0.0039	0.0019	0.000546	5.3e-05	0.18689	0.042	0.023	-0.067338	0.00023	0.00016	3.52	0.34	3.60837	0.350382	134	6.9	261000
BHX_2s_01 - 2	25.042	0.0039	0.0013	0.000562	3.7e-05	-0.3338	0.052	0.018	0.32783	0.000155	9.5e-05	3.62	0.24	3.70852	0.237779	321	13.7	601000
BHX_2s_02 - 1	3.7143	0.007	0.0077	0.0005	0.00021	-0.00089367	0.11	0.12	0.44806	0.00013	0.00025	3.2	1.3	3.30967	1.3901	198	20	457400
BHX_2s_02 - 2	25.042	0.0045	0.0013	0.000587	3.4e-05	0.14829	0.059	0.018	-0.08965	0.000149	8.7e-05	3.79	0.22	3.8653	0.224208	417	22.3	757000
BHX_2s_02 - 3	25.042	0.004	0.0014	0.00054	4.3e-05	0.076368	0.059	0.019	0.22444	0.000152	8.7e-05	3.48	0.28	3.56896	0.277744	417	21.6	813000
BHX_2s_03 - 1	19.77	0.0087	0.0031	0.000579	6.8e-05	0.074652	0.109	0.041	-0.016053	0.00021	0.00017	3.73	0.44	3.81952	0.448686	109	13.7	225000
BHX_2s_03 - 2	25.162	0.0034	0.002	0.000558	6.7e-05	-0.015121	0.041	0.028	0.40326	0.00018	0.00018	3.6	0.43	3.68519	0.442585	129	6	250000
BHX_2s_04 - 1	25.162	0.0046	0.002	0.000565	4.9e-05	-0.0055733	0.061	0.028	0.11703	0.00026	0.00017	3.64	0.31	3.73094	0.317096	268	14.7	512000
BHX_2s_05 - 1	25.042	0.0045	0.0052	0.00061	0.00011	0.06382	0.045	0.085	0.1135	0.00059	0.00047	3.93	0.68	4.01646	0.724363	66	3.6	113800
BHX_2s_05 - 2	25.042	0.0043	0.0028	0.000684	7.5e-05	0.06894	0.049	0.033	-0.029402	0.00027	0.00023	4.41	0.49	4.48944	0.492424	113	6.8	183000
BHX_2s_06 - 1	25.042	0.0006	0.0045	0.000579	8.2e-05	0.020441	-0.002	0.062	0.19438	0.00015	0.00021	3.73	0.53	3.81916	0.534379	64.4	0.3	113300
BHX_2s_06 - 2	25.042	0.0039	0.0014	0.000601	5.2e-05	0.087924	0.054	0.02	0.32935	0.00013	0.00011	3.87	0.33	3.96222	0.336362	217	10.3	382000
BHX_2s_07 - 1	25.042	0.0041	0.0019	0.000637	5.3e-05	0.066926	0.038	0.02	0.19175	0.000158	9.4e-05	4.1	0.34	4.17851	0.348018	198	9.2	330000
BHX_2s_07 - 2	23.844	0.0003	0.0017	0.000568	6.1e-05	0.26581	0.003	0.025	-0.21524	0.00014	0.00014	3.66	0.4	3.74882	0.402718	172	0.6	312000
BHX_2s_08 - 1	22.765	0.0061	0.0025	0.000561	4.9e-05	-0.33012	0.082	0.034	0.80952	0.00033	0.00021	3.62	0.31	3.69709	0.316566	140	10.9	265000
BHX_2s_08 - 2	25.042	0.0077	0.0026	0.000535	6.3e-05	-0.017058	0.115	0.044	0.60893	0.00019	0.00014	3.45	0.4	3.53253	0.409526	203	21.6	410000
BHX_2s_09 - 1	25.162	0.0043	0.0038	0.000671	9.4e-05	-0.16985	0.054	0.059	0.2175	9e-05	0.00016	4.32	0.61	4.40625	0.617392	107	4.7	167000
BHX_2s_12 - 1	25.042	0.0086	0.0035	0.00056	7.9e-05	-0.11555	0.1	0.052	0.78104	0.00016	0.00015	3.61	0.51	3.69829	0.521805	132	12	258000
BHX_2s_12 - 2	25.042	0.0041	0.0014	0.000602	5.1e-05	-0.18445	0.05	0.018	0.45007	0.00019	0.00011	3.88	0.33	3.96094	0.335793	314	14.6	570000
BHX_2s_13 - 1	25.042	0.0042	0.0014	0.000542	4e-05	-0.4219	0.061	0.021	0.57574	8.8e-05	7e-05	3.5	0.26	3.57762	0.264262	345	16.8	644000
BHX_2s_13 - 2	25.042	0.00401	0.00092	0.000582	2.4e-05	-0.13048	0.052	0.012	0.28318	0.000134	5e-05	3.75	0.16	3.82581	0.158472	626	31.2	1161000
BHX_2s_14 - 1	25.042	0.0034	0.0012	0.000581	4.2e-05	-0.1993	0.047	0.017	0.52641	0.0001	7.5e-05	3.74	0.27	3.82876	0.277004	346	13.9	607000
BHX_2s_14 - 2	25.162	0.0052	0.0028	0.000594	6.5e-05	-0.035481	0.048	0.03	0.44479	0.00013	0.00014	3.83	0.42	3.91745	0.428779	132	6.9	225000
BHX_2s_15 - 1	25.162	0.0006	0.0025	0.00066	6.5e-05	-0.31384	0.018	0.034	0.56193	0.00022	0.00019	4.25	0.42	4.33255	0.42034	98.2	0.1	160400
BHX_2s_15 - 2	25.042	0.0036	0.0012	0.000576	3.8e-05	-0.16496	0.045	0.015	0.27571	0.000201	9.8e-05	3.71	0.24	3.79776	0.250775	501	23.9	918000
BHX_2s_16 - 1	25.042	-0.0017	0.0022	0.000598	7.3e-05	-0.064459	0.003	0.039	-0.56789	3e-05	0.00013	3.85	0.47	3.9347	0.48049	114	-2.3	196100
BHX_2s_16 - 2	25.042	0.0016	0.0018	0.000527	5.8e-05	-0.094191	0.031	0.028	0.17215	0.0002	0.0001	3.4	0.37	3.47705	0.38288	199	4.2	398000
BHX_2s_17 - 1	25.042	0.0044	0.0012	0.00058	3.7e-05	-0.004145	0.056	0.016	0.074579	0.000131	7.6e-05	3.74	0.24	3.82253	0.23752	384	20.3	710000
BHX_2s_17 - 2	25.162	0.0043	0.002	0.000552	5.3e-05	0.13029	0.057	0.026	-0.038712	1.8e-05	8.6e-05	3.56	0.34	3.63985	0.343092	183	10.3	351000
BHX_2s_18 - 1	25.042	0.0061	0.0032	0.000598	7.2e-05	0.11232	0.063	0.039	-0.00027547	-1.6e-05	9.2e-05	3.86	0.47	3.93063	0.473469	114	8.3	212000
BHX_2s_18 - 2	25.162	0.0046	0.0034	0.00058	7.8e-05	-0.022788	0.059	0.049	0.15321	0.00011	0.00019	3.74	0.5	3.8205	0.513929	85	4.6	150400
BHX_2s_19 - 1	25.162	0.0034	0.0029	0.00056	7.8e-05	-0.097111	0.049	0.045	0.24515	-0.0001	0.00019	3.61	0.51	3.69637	0.514949	93	4.4	169100
BHX_2s_20 - 2	25.162	0.005	0.0022	0.00054	5.4e-05	-0.015492	0.071	0.031	0.2703	0.00018	0.00013	3.48	0.34	3.56991	0.350496	229	16	442000
BHX_2s_22 - 1	25.042	0.0067	0.0027	0.000596	5.7e-05	0.60745	0.073	0.032	0.0057843	0.00025	0.00021	3.84	0.37	3.93178	0.376129	178	15.7	322000
BHX_2s_22 - 2	25.042	0.004	0.0018	0.000535	3.6e-05	-0.024252	0.06	0.026	0.21191	4.8e-05	7e-05	3.45	0.23	3.53923	0.231692	278	15.8	559000
BHX_2s_23 - 1	25.042	0.0058	0.0035	0.000711	7e-05	-0.003125	0.059	0.036	-0.088992	1e-05	0.00016	4.58	0.45	4.66671	0.459592	126	7.4	185000
BHX_2s_23 - 2	25.042	0.0037	0.0022	0.000574	4.5e-05	0.16587	0.041	0.025	0.055434	0.00027	0.00018	3.7	0.29	3.7888	0.297173	175	7.1	323000
BHX_2s_24 - 1	13.779	0.0043	0.0028	0.000575	8e-05	-0.039767	0.077	0.047	0.16432	0	1	3.7	0.51	3.79169	0.521052	147	7.4	265000
BHX_2s_24 - 2	25.042	0.0059	0.0018	0.000507	5.7e-05	0.27501	0.078	0.027	0.52894	0.00015	0.00017	3.27	0.37	3.35263	0.377076	128	10.6	255000
BHX_2s_25 - 1	25.042	0.0037	0.0014	0.000563	4.2e-05	0.14926	0.052	0.019	0.19034	0.00028	0.00014	3.63	0.27	3.71652	0.270826	287	14	552000
BHX_2s_25 - 2	25.042	0.0054	0.0022	0.00054	7.3e-05	-0.21652	0.095	0.047	0.3003	0.00026	0.00015	3.48	0.47	3.56977	0.482665	148	10.8	290000
BHX_2s_26 - 1	25.042	0.0019	0.0016	0.000513	5.2e-05	0.2304	0.013	0.02	-0.095027	0.000103	8.6e-05	3.31	0.34	3.39627	0.344374	213	5.2	439000
BHX_2s_26 - 2	25.042	0.0025	0.0016	0.000553	3.2e-05	0.068095	0.026	0.019	-0.028423	0.00015	0.00013	3.56	0.21	3.65242	0.211566	259	10	512600
BHX_2s_27 - 1	25.281	0.0042	0.0013	0.000553	4e-05	0.21086	0.058	0.017	0.16739	0.000173	8.3e-05	3.57	0.26	3.6489	0.257568	368	20.4	704700
BHX_2s_27 - 2	25.042	0.00418	0.00082	0.000554	2.5e-05	-0.22372	0.057	0.012	0.35534	0.000155	4.8e-05	3.57	0.16	3.64887	0.165212	865	46.4	1666000
BHX_2s_28 - 1	10.424	0.006	0.0033	0.00064	8.3e-05	-0.029482	0.072	0.04	-0.017213	8e-05	0.00015	4.12	0.53	4.20681	0.539135	148	10	259500
BHX_2s_28 - 2	25.042	0.0049	0.002	0.000565	5.4e-05	0.11435	0.061	0.027	0.18105	-3e-05	0.00012	3.64	0.35	3.73133	0.356735	139	8.7	258200
BHX_2s_29 - 1	25.162	0.0062	0.0033	0.000568	8.4e-05	-0.21107	0.123	0.076	0.8935	4e-05	0.00024	3.66	0.54	3.74913	0.554531	79	6.2	143900
BHX_2s_29 - 2	25.042	0.0034	0.004	0.000549	8.5e-05	0.096265	0.04	0.076	-0.32553	0.00021	0.00024	3.54	0.55	3.6293	0.561979	66	2.9	121700
BHX_2s_30 - 1	25.162	0.0045	0.0022	0.000587	6.5e-05	-0.12559	0.059	0.031	0.62814	0.00011	0.00016	3.78	0.42	3.87722	0.4294	116	6.2	206000
BHX_2s_30 - 2	25.042	0.0046	0.0015	0.000641	4.8e-05	-0.10486	0.057	0.019	0.29655	0.000118	7e-05	4.13	0.31	4.21275	0.309138	387	20.4	655000
BHX_2s_31 - 1	13.3	0.0045	0.0019	0.000609	5.6e-05	-0.29059	0.052	0.024	0.58474	0.00027	0.00013	3.92	0.36	4.0059	0.368572	376	19.8	681000
BHX_2s_31 - 2	8.8664	0.0094	0.0049	0.00062	0.00012	0.27579	0.111	0.063	-0.12147	0.00025	0.00026	3.99	0.77	4.08606	0.790902	167	18.3	270100
BHX_2s_32 - 1	25.042	0.003	0.0015	0.00054	3.6e-05	0.025988	0.041	0.021	0.22301	0.000117	9e-05	3.48	0.23	3.56622	0.237978	351	12.7	721000
BHX_2s_32 - 2	25.042	0.0055	0.0022	0.000552	5.2e-05	-0.20156	0.086	0.035	0.36461	0.00019	0.00014	3.56	0.34	3.64809	0.343771	218	15.6	414000
BHX_2s_33 - 1	25.042	0.0055	0.0022	0.000577	7.1e-05	-0.065281	0.08	0.034	0.46872	0.00014	0.00017	3.72	0.46	3.80938	0.468826	135	10.3	252000
BHX_2s_33 - 2	25.042	0.0062	0.0021	0.000619	5.4e-05	0.1071	0.08	0.027	0.12216	0.0001	0.00011	3.99	0.35	4.07491	0.355648	253	22.9	458000
BHX_2s_34 - 1	25.042	0.0071	0.0034	0.00063	7.6e-05	0.20097	0.087	0.04	0.20413	-0.00017	0.00012	4.06	0.49	4.15175	0.500919	112	9.1	191000
BHX_2s_34 - 2	25.042	0.005	0.0014	0.000572	4e-05	-0.034443	0.066	0.02	0.28673	0.0002	0.00011	3.69	0.26	3.77664	0.264251	432	26.3	796000
BHX_2s_35 - 1	25.162	0.0056	0.0023	0.000541	7.1e-05	0.045453	0.096	0.044	0.013173	-1e-05	0.00012	3.49	0.46	3.56921	0.468566	110	8.2	211700
BHX_2s_35 - 2	25.042	0.0054	0.0019	0.000605	6.6e-05	0.018046	0.059	0.025	0.1127	0.00026	0.00013	3.9	0.42	3.98391	0.434749	202	12.8	350000
BHX_2s_36 - 1	25.042	0.0064	0.0025	0.00068	8.2e-05	-0.19858	0.101	0.048	0.517	0.00014	0.00012	4.38	0.53	4.4639	0.538438	120	8	186000
BHX_2s_36 - 2	25.042	0.0079	0.0022	0.000517	5.4e-05	-0.17169	0.111	0.036	0.46178	0.00023	0.00016	3.33	0.35	3.4201	0.357353	140	15	280300
BHX_2s_37 - 1	25.042	0.0045	0.0013	0.000551	3.3e-05	-0.056627	0.059	0.017	0.26306	0.00018	8e-05	3.55	0.22	3.62777	0.217735	418	23	793000
BHX_2s_37 - 2	25.162	0.0047	0.0013	0.000555	3.7e-05	0.19359	0.06	0.017	0.18248	0.0002	6.9e-05	3.58	0.24	3.63649	0.236835	428	25.5	800000
BHX_2s_38 - 1	25.162	0.0044	0.0021	0.000601	7.1e-05	0.029593	0.059	0.031	0.4695	6e-05	0.00023	3.87	0.46	3.95099	0.466962	129	6.5	220000
BHX_2s_38 - 3	25.162	0.00415	0.00068	0.000547	2.1e-05	-0.055953	0.0546	0.0089	0.39608	0.000188	6.4e-05	3.53	0.13	3.60387	0.132452	899	50.1	1696000
BHX_2s_39 - 1	25.042	0.0034	0.0016	0.000553	4.3e-05	0.022967	0.043	0.023	0.15069	0.00023	0.00014	3.56	0.28	3.64637	0.283783	504	23.9	1010000
BHX_2s_39 - 2	25.162	0.0037	0.002	0.000541	5.2e-05	0.20629	0.044	0.026	-0.21627	0.00017	0.00016	3.49	0.33	3.56938	0.343284	193	9.4	378700
BHX_2s_40 - 1	4.6729	0.0009	0.0061	0.00045	0.00016	-0.44073	0.04	0.11	0.50928	0.0011	0.0014	2.9	1	2.9807	1.05988	59	1	147600
BHX_2s_40 - 2	25.042	0.0052	0.0034	0.000553	5.2e-05	-0.19517	0.091	0.055	0.33363	0.00012	0.00014	3.56	0.33	3.64877	0.336683	112	7.5	210900
BHX_2s_41 - 1	10.424	0.0086	0.0064	0.000628	7.9e-05	0.2526	0.098	0.071	-0.23078	0.0002	0.00028	4.05	0.51	4.13135	0.519833	184	19	348000
BHX_2s_41 - 2	25.042	0.0043	0.0017	0.000588	4.9e-05	-0.11026	0.059	0.02	0.3318	0.00022	0.00014	3.79	0.31	3.87085	0.322809	244	13.9	442000
BHX_2s_42 - 1	25.042	0.0029	0.0017	0.000521	4.4e-05	-0.089899	0.047	0.027	0.38289	-7.6e-05	9.6e-05	3.36	0.29	3.4406	0.290803	192	7.5	377000
BHX_2s_42 - 2	25.042	0.0049	0.0016	0.000544	4.8e-05	0.12342	0.068	0.023	0.13204	0.000104	8.6e-05	3.5	0.31	3.58296	0.316457	263	20.3	504000
BHX_2s_43 - 1	16.655	0.0044	0.0023	0.000602	5.3e-05	-0.079692	0.056	0.029	0.12464	0.00019	0.00011	3.88	0.34	3.9321	0.340517	252	12.2	450000
BHX_2s_43 - 2	25.162	0.0063	0.0034	0.000687	6.3e-05	-0.015599	0.061	0.041	0.062582	0.00021	0.00017	4.42	0.4	4.49635	0.406164	129	8	196000
BHX_2s_44 - 1	25.042	0.0034	0.0022	0.000579	8e-05	0.44131	0.026	0.028	0.095227	0.00034	0.00028	3.73	0.52	3.80547	0.526023	96	4.2	172000
BHX_2s_44 - 2	25.042	0.0041	0.0017	0.000536	5e-05	-0.015258	0.065	0.027	0.14743	0.00029	0.00018	3.46	0.32	3.53522	0.323425	200	11.2	392700
BHX_2s_45 - 1	25.042	0.0044	0.0016	0.00059	6.1e-05	0.10219	0.056	0.019	0.26567	0.00027	0.00016	3.8	0.39	3.88322	0.401683	231	12.4	405500
BHX_2s_45 - 2	25.162	0.0053	0.0026	0.000685	6.1e-05	0.55335	0.049	0.024	-0.34772	-0.00014	0.00014	4.41	0.39	4.49458	0.400462	263	15	408000
BHX_2s_46 - 1	25.162	0.0045	0.0022	0.00067	0.00011	0.26797	0.049	0.029	-0.066	0.00017	0.00016	4.31	0.69	4.39313	0.721416	112	5.4	178000
BHX_2s_46 - 2	25.042	0.0014	0.0016	0.000584	8e-05	0.070509	0.027	0.028	0.062766	0	1	3.76	0.52	3.84445	0.526789	124	3.9	225000
BHX_2s_47 - 1	25.042	0.0027	0.0012	0.000577	4.5e-05	-0.14373	0.044	0.019	0.12925	0.0003	0.00015	3.72	0.29	3.79866	0.296537	251	8.5	471000
BHX_2s_47 - 2	25.042	0.0053	0.0014	0.000561	4e-05	0.018685	0.066	0.018	0.13482	0.000162	8.8e-05	3.62	0.26	3.6955	0.25723	430	28.7	798000
BHX_2s_48 - 1	24.203	0.0081	0.0025	0.000675	6.8e-05	0.29602	0.089	0.028	0.50528	0.00025	0.00024	4.35	0.44	4.4312	0.446582	168	14.4	257700
BHX_2s_49 - 1	25.042	0.0044	0.0014	0.000579	4.9e-05	-0.077422	0.054	0.018	0.36786	0.00022	0.00016	3.73	0.32	3.81456	0.323033	302	16.2	543000
BHX_2s_49 - 2	11.862	0.0067	0.0029	0.000486	5.7e-05	0.10379	0.085	0.039	0.25462	0.00026	0.00017	3.13	0.37	3.20287	0.376012	229	22.6	458600
BHX_2s_50 - 1	25.042	0.0087	0.0021	0.00059	4.6e-05	0.1073	0.114	0.03	0.31016	0.00034	0.00018	3.8	0.3	3.88164	0.302926	283	30.8	489000
BHX_2s_50 - 2	25.042	0.0017	0.0017	0.000564	4.2e-05	-0.23539	0.022	0.022	0.18517	0.000112	9.4e-05	3.64	0.27	3.71397	0.270312	184	4	344000
BHX_2s_52 - 1	25.042	0.0043	0.003	0.00072	8.8e-05	-0.14173	0.061	0.036	0.2543	0.00058	0.0003	4.64	0.57	4.71186	0.576129	125	5.3	177200
BHX_2s_52 - 2	25.042	0.0046	0.0026	0.000602	7.1e-05	0.060976	0.047	0.03	0.083754	0.00024	0.00015	3.88	0.45	3.94177	0.458794	188	9.1	319000
BHX_2s_53 - 1	25.042	0.0051	0.0011	0.000625	3e-05	-0.18207	0.058	0.013	0.32107	0.000151	4.7e-05	4.03	0.19	4.04852	0.197939	597	37.4	1032000
BHX_2s_53 - 2	25.042	0.0065	0.0034	0.000655	9.7e-05	-0.19902	0.065	0.047	0.58172	0.00057	0.00033	4.22	0.62	4.29159	0.629224	113	6.4	173300
BHX_2s_53 - 3	25.042	0.0024	0.0026	0.000617	8.1e-05	0.32378	0.017	0.03	-0.08153	-0.00019	0.00017	3.98	0.52	4.05735	0.5328	118	2.8	209000
BHX_2s_54 - 1	25.042	0.0058	0.0033	0.000645	7.6e-05	0.059373	0.067	0.039	0.24135	0.00025	0.00018	4.15	0.49	4.22998	0.498665	114	7.8	194200
BHX_2s_54 - 2	25.042	0.0039	0.0023	0.000518	5.6e-05	-0.10844	0.065	0.037	0.45538	0.00011	8.6e-05	3.34	0.36	3.41059	0.36906	183	11.4	369500
BHX_2s_54 - 3	25.162	0.0031	0.0019	0.000622	6.6e-05	0.38956	0.032	0.019	0.44687	0.00024	0.00019	4.01	0.42	4.08145	0.433371	124	4.3	205000
BHX_2s_55 - 1	25.162	0.00413	0.00087	0.000576	2.8e-05	0.1047	0.051	0.011	0.18075	0.000123	5.1e-05	3.71	0.18	3.78324	0.184649	744	34.6	1400000
BHX_2s_55 - 2	25.042	0.0048	0.001	0.000575	4.4e-05	-0.090086	0.064	0.016	0.68512	0.00027	0.0001	3.71	0.28	3.78692	0.290048	405	22.4	719000
BHX_2s_56 - 1	25.042	0.0042	0.0032	0.000674	7.6e-05	0.20025	0.058	0.042	-0.88888	0.00023	0.00033	4.34	0.49	4.41643	0.491702	98	4.4	150000
BHX_2s_56 - 2	21.926	0.0045	0.0011	0.000554	2.9e-05	-0.049533	0.06	0.016	0.23665	0.000194	7.4e-05	3.57	0.19	3.62978	0.191202	499	28.7	918000
BHX_2s_57 - 1	25.042	0.0053	0.0023	0.000643	7.5e-05	0.059375	0.061	0.025	0.20508	0.00017	0.00017	4.15	0.48	4.22412	0.492875	133	7.8	218900
BHX_2s_57 - 2	25.042	0.004	0.0014	0.000543	4e-05	-0.16157	0.055	0.019	0.26674	8.5e-05	5.8e-05	3.5	0.26	3.57299	0.257092	379	19.9	719100
BHX_2s_58 - 1	25.162	0.0048	0.0019	0.000537	4.5e-05	0.086008	0.063	0.026	0.13792	0.00016	0.00013	3.46	0.29	3.53887	0.296867	207	13.7	389000
BHX_2s_58 - 2	25.281	0.0052	0.0013	0.000584	3.6e-05	-0.064812	0.065	0.016	0.16434	0.000174	9.7e-05	3.76	0.23	3.8404	0.237166	324	18.6	566000
BHX_2s_59 - 1	25.042	0.0031	0.0014	0.000622	4.1e-05	-0.023161	0.039	0.019	0.10174	0.00017	0.00015	4.01	0.26	4.09585	0.263595	210	7.5	352000
BHX_2s_59 - 2	25.042	0.0045	0.0011	0.00055	3.2e-05	0.25553	0.056	0.014	0.090908	0.000139	9.8e-05	3.54	0.21	3.63571	0.211704	489	28.6	921000
BHX_2s_60 - 1	25.042	0.0024	0.0021	0.000593	7.1e-05	-0.22729	0.034	0.029	0.34978	0.00032	0.00016	3.82	0.46	3.8981	0.466942	159	5.2	273600
BHX_2s_60 - 2	25.162	0.0032	0.0012	0.000546	3.1e-05	0.12111	0.048	0.017	0.020388	0.000186	8e-05	3.52	0.2	3.59347	0.198016	404	17.1	772600
BHX_2s_61 - 1	22.046	0.005	0.0024	0.000586	5.8e-05	-0.037155	0.064	0.028	0.20164	6.9e-05	7.1e-05	3.77	0.37	3.86108	0.382318	232	13.3	385000
BHX_2s_61 - 2	25.042	0.0037	0.0012	0.000553	4.4e-05	0.063947	0.053	0.018	0.17483	0.000127	9.9e-05	3.57	0.28	3.65277	0.290788	340	16.3	642900
BHX_2s_62 - 1	25.042	0.0039	0.0011	0.000602	4.6e-05	0.28931	0.049	0.013	-0.11467	0.000196	9.6e-05	3.88	0.29	3.94472	0.295487	292	14.6	509000
BHX_2s_62 - 2	22.166	0.0071	0.0021	0.000646	6.6e-05	-0.046303	0.092	0.033	0.12686	2e-05	9.1e-05	4.16	0.43	4.24081	0.433498	227	17.8	372000
BHX_2s_63 - 1	25.042	0.0073	0.003	0.000589	4.8e-05	0.043537	0.101	0.045	-0.050366	0.00018	0.00013	3.79	0.31	3.87845	0.316296	217	18.9	382000
BHX_2s_63 - 2	4.6729	0.0054	0.0058	0.0005	9.4e-05	-0.7505	0.11	0.12	0.86971	-0.0001104	5.3e-06	3.22	0.61	3.31432	0.623145	138	11	324000
BHX_2s_64 - 1	25.162	0.0106	0.0044	0.000585	7.6e-05	0.19061	0.115	0.058	0.091282	5e-05	0.0001	3.77	0.49	3.86091	0.495066	95	12.2	168500
BHX_2s_64 - 2	25.042	0.0018	0.0017	0.000583	4.8e-05	0.36651	0.018	0.02	-0.34077	7e-05	0.00011	3.75	0.31	3.84617	0.310213	166	6	301000
BHX_2s_65 - 1	25.162	0.0044	0.0017	0.000576	4.6e-05	-0.25998	0.055	0.024	0.57942	0.000214	9.4e-05	3.71	0.29	3.79279	0.296582	580	30	1100000
BHX_2s_65 - 2	23.125	0.0068	0.0021	0.000592	4e-05	-0.011618	0.082	0.024	-0.018644	0.00022	0.0001	3.81	0.26	3.89403	0.263453	660	45	1150000
BHX_2s_66 - 1	23.125	0.0062	0.002	0.00065	4.8e-05	0.20696	0.069	0.022	0.1775	0.000213	9.2e-05	4.19	0.31	4.24602	0.314352	332	21.8	545000
BHX_2s_66 - 2	25.042	0.0067	0.0037	0.000657	6.2e-05	0.14531	0.064	0.039	0.71239	0.0009	0.00056	4.23	0.4	4.32475	0.408219	157	12	257000
BHX_2s_67 - 1	11.742	0.0043	0.0012	0.000543	5.4e-05	-0.019607	0.057	0.017	0.22774	0.000158	7.8e-05	3.5	0.35	3.57613	0.355922	638	35.7	1301000
BHX_2s_67 - 2	25.042	0.0064	0.0016	0.000559	3.8e-05	-0.10169	0.087	0.021	0.31835	0.00026	0.0001	3.6	0.24	3.69393	0.251251	336	27.7	640000
BHX_2s_68 - 1	25.042	0.0043	0.0024	0.000599	5.1e-05	-0.24263	0.046	0.027	0.30186	0.000123	9.2e-05	3.86	0.33	3.94774	0.336269	183	9.5	322000
BHX_2s_68 - 2	25.042	0.0042	0.0023	0.000492	5.2e-05	-0.2188	0.075	0.041	0.37221	0.00011	0.00013	3.17	0.34	3.26069	0.34474	128	7.8	271400
BHX_2s_70 - 1	25.042	0.0017	0.0022	0.000562	8.3e-05	-0.18698	0.036	0.044	0.42853	0.00015	0.00017	3.62	0.53	3.71338	0.541876	134	2.5	232000
BHX_2s_70 - 2	25.162	0.0059	0.0021	0.000596	6.8e-05	0.094485	0.07	0.025	0.2118	8e-05	0.00013	3.84	0.44	3.929	0.448383	135	9.7	242000
BHX_2s_72 - 1	25.162	0.0072	0.0036	0.000672	8.4e-05	0.11523	0.064	0.04	0.44635	0.000147	9.9e-05	4.33	0.54	4.39159	0.549345	126	9.1	202000
BHX_2s_73 - 1	25.162	0.0034	0.0042	0.00049	8e-05	0.042248	0.033	0.075	-0.81385	0.00107	0.0006	3.16	0.52	3.25119	0.530861	64	3.1	133500
BHX_2s_73 - 2	25.162	0.0005	0.0026	0.000605	5.3e-05	0.077903	0.001	0.032	-0.1519	0.00029	0.00023	3.9	0.34	3.98807	0.342907	100.7	0.9	176000
BHX_2s_74 - 1	25.042	0.0026	0.0024	0.000542	7.1e-05	-0.20475	0.048	0.037	-0.40119	0	0.00027	3.49	0.46	3.58739	0.469992	128	4.4	239900
BHX_2s_74 - 2	25.042	0.0056	0.0018	0.000556	6.2e-05	-0.024796	0.076	0.027	0.41199	0.00031	0.00023	3.59	0.4	3.67655	0.403437	169	13.7	318000
BHX_2s_75 - 1	16.774	0.0028	0.0012	0.000597	4.4e-05	-0.39092	0.032	0.015	0.62865	0.000241	8.1e-05	3.85	0.28	3.92847	0.289808	621	21.3	1052000
BHX_2s_75 - 2	25.042	0.0064	0.0013	0.000587	2.5e-05	-0.078456	0.077	0.017	0.20998	0.000197	6.5e-05	3.79	0.16	3.85699	0.158445	660	51	1152000
BHX_2s_76 - 1	6.5899	0.0091	0.0078	0.00053	0.00015	0.69246	0.106	0.072	-0.1985	-0.00012	0.00023	3.4	0.94	3.50624	0.992371	158	19	343000
BHX_2s_76 - 2	25.042	0.0041	0.0023	0.000503	5.2e-05	-0.26154	0.066	0.04	-0.14501	0.00021	0.00017	3.24	0.33	3.33079	0.337839	119	7.1	240000
BHX_2s_77 - 1	25.042	0.00378	0.00078	0.00056	2.8e-05	-0.19482	0.051	0.011	0.42829	0.000195	5.5e-05	3.61	0.18	3.68156	0.178217	864	39.9	1630000
BHX_2s_77 - 2	25.042	0.0079	0.0023	0.000546	5.3e-05	-0.043636	0.116	0.034	0.43998	0.00013	0.00012	3.52	0.34	3.60752	0.350307	262	26.6	486000
Young Tonalite
BHX_4s_01 - 1	25.042	0.0045	0.0015	0.000563	5.7e-05	0.18429	0.06	0.019	0.027192	0.00027	0.00016	3.63	0.37	3.71166	0.375959	259	15.2	460000
BHX_4s_01 - 2	25.042	0.0041	0.0016	0.000607	5.5e-05	0.082927	0.053	0.02	0.12703	6.5e-05	7.3e-05	3.91	0.35	3.99971	0.355961	279	13.7	455000
BHX_4s_02 - 1	25.042	0.0046	0.0014	0.000622	4.9e-05	0.34591	0.048	0.015	-0.33677	0.000189	6.8e-05	4.01	0.32	4.05594	0.320609	331	17.4	547000
BHX_4s_02 - 2	25.042	0.0015	0.0024	0.000533	8.7e-05	0.072267	0.066	0.097	0.72081	1e-05	0.00021	3.44	0.56	3.51575	0.574003	54.4	1.1	107000
BHX_4s_03 - 1	25.162	0.0057	0.0029	0.000575	5e-05	0.45563	0.075	0.036	-0.41082	-0.00013	0.00014	3.71	0.32	3.79094	0.329825	191	13.8	343700
BHX_4s_03 - 2	25.042	0.00265	0.00071	0.000517	2.6e-05	-0.066129	0.04	0.011	0.2472	0.000136	4.7e-05	3.33	0.17	3.39526	0.171879	693	28.2	1357000
BHX_4s_04 - 1	25.042	0.0063	0.0019	0.000563	4.7e-05	-0.14408	0.087	0.029	0.15152	0.00016	0.00011	3.63	0.3	3.71291	0.310157	253	20	475000
BHX_4s_04 - 2	25.162	0.0041	0.0011	0.000585	3.1e-05	0.031606	0.049	0.013	0.098445	0.000184	9.9e-05	3.77	0.2	3.85079	0.197883	510	24.9	883000
BHX_4s_05 - 2	25.162	0.0032	0.0012	0.000571	3.5e-05	0.028589	0.039	0.015	0.27671	0.000117	5.7e-05	3.68	0.22	3.75144	0.223976	442	20.4	820000
BHX_4s_06 - 1	25.042	0.0021	0.0011	0.000586	3.6e-05	0.058984	0.03	0.015	0.22356	0.00017	0.00011	3.78	0.23	3.85516	0.237221	290	8	523000
BHX_4s_06 - 2	25.162	0.0051	0.0018	0.000531	5.5e-05	-0.31749	0.076	0.031	0.54042	7e-05	0.00011	3.42	0.36	3.50848	0.363549	186	12.7	372000
BHX_4s_07 - 1	25.042	0.0036	0.0029	0.000656	7.8e-05	0.16576	0.032	0.031	0.31632	0.00013	0.00012	4.23	0.51	4.30217	0.511766	135	5.2	214700
BHX_4s_08 - 1	25.042	0.0034	0.0018	0.000542	3.8e-05	-0.44702	0.044	0.024	0.89032	0.0005	0.00027	3.49	0.24	3.58415	0.244822	188	10.8	358000
BHX_4s_08 - 2	25.162	0.004	0.0015	0.000585	4.7e-05	-0.11036	0.052	0.02	0.39205	0.00021	0.00013	3.77	0.3	3.84979	0.309576	229	11.3	412000
BHX_4s_09 - 2	25.162	0.0033	0.0011	0.000596	3.9e-05	0.15251	0.04	0.013	-0.052457	0.000146	9.1e-05	3.84	0.25	3.92804	0.250653	456	18.5	801000
BHX_4s_10 - 1	25.042	0.005	0.0025	0.00062	7.1e-05	-0.044322	0.076	0.038	0.36924	0.00019	0.00013	4	0.45	4.0706	0.45983	138	9	235000
BHX_4s_10 - 2	25.042	0.00413	0.00041	0.000546	1.7e-05	0.034693	0.0555	0.0053	0.30465	0.000162	2.8e-05	3.52	0.11	3.58351	0.113205	1678	89.8	3177000
BHX_4s_11 - 1	25.042	0.0026	0.0019	0.000613	6.6e-05	0.067297	0.041	0.028	0.12853	9.4e-05	9.9e-05	3.95	0.43	4.02251	0.433396	165	5.3	288000
BHX_4s_11 - 2	25.162	0.0066	0.002	0.000637	6.7e-05	-0.03859	0.078	0.024	0.20619	0.000146	8.8e-05	4.1	0.43	4.17371	0.439349	205	15.4	340000
BHX_4s_11 - 3	6.3503	0.0043	0.0023	0.00067	0.00013	-0.047515	0.053	0.028	0.30778	2.2e-05	7e-05	4.34	0.86	4.39052	0.852042	334	14.6	552000
BHX_4s_12 - 1	25.162	0.0047	0.0019	0.000571	5.2e-05	0.10959	0.053	0.022	0.32285	0.00017	0.00014	3.68	0.33	3.76703	0.336612	185	10.8	348000
BHX_4s_12 - 2	25.162	0.00308	0.00061	0.000523	2e-05	0.13154	0.0426	0.0087	0.21974	0.000168	4.1e-05	3.37	0.13	3.43992	0.132667	1021	43.1	2035000
BHX_4s_13 - 1	25.042	0.0002	0.0025	0.000609	7.4e-05	0.50997	-0.015	0.031	-0.45639	0.0002	0.00027	3.93	0.48	4.01463	0.487906	120	0.5	206000
BHX_4s_13 - 2	25.162	0.0048	0.0035	0.00063	0.0001	0.092071	0.065	0.052	-0.23061	0.00016	0.00023	4.07	0.67	4.14789	0.658472	84	5.3	143000
BHX_4s_13 - 3	25.042	0.0063	0.0022	0.000577	4.9e-05	-0.19383	0.083	0.033	0.43888	-2.6e-05	5.7e-05	3.72	0.31	3.80759	0.323484	217	17.2	392000
BHX_4s_14 - 1	25.042	0.0069	0.0024	0.000523	7e-05	-0.15125	0.104	0.044	0.4551	0.00014	0.00013	3.37	0.45	3.45472	0.462526	101	9.4	195800
BHX_4s_14 - 2	25.042	0.0067	0.0026	0.000571	6.2e-05	0.4944	0.073	0.031	0.10295	0.00014	0.00016	3.68	0.4	3.76353	0.40881	166	13.2	298000
BHX_4s_15 - 1	17.373	0.0059	0.0038	0.000607	9.1e-05	0.070762	0.067	0.048	0.18456	0	1	3.91	0.59	3.9901	0.598343	151	10.5	237000
BHX_4s_15 - 2	25.042	0.0046	0.0017	0.000588	4.1e-05	0.075184	0.061	0.021	0.16598	0.000113	8.1e-05	3.79	0.27	3.8637	0.26984	222	14.2	395000
BHX_4s_16 - 1	12.701	0.0056	0.0025	0.000536	5.5e-05	-0.105	0.077	0.04	0.23824	0.00019	0.00016	3.45	0.36	3.53213	0.3627	233	17	459900
BHX_4s_16 - 2	25.042	0.0033	0.0012	0.000621	4.5e-05	-0.085578	0.043	0.015	0.51266	0.000156	7.4e-05	4	0.29	4.0738	0.295656	330	13.2	565000
BHX_4s_17 - 1	8.1475	0.0044	0.0015	0.000533	4.3e-05	-0.099095	0.078	0.034	0.29298	0.00016	0.00015	3.44	0.27	3.51605	0.277342	397	24.5	863000
BHX_4s_17 - 2	25.162	0.0036	0.0018	0.000606	7.2e-05	0.4118	0.041	0.023	-0.44303	0.0002	0.00016	3.9	0.46	3.99236	0.474451	167	8.9	298000
BHX_4s_18 - 1	25.042	0.0078	0.0021	0.000535	4.9e-05	0.027115	0.1	0.029	0.24332	0.00026	0.00011	3.45	0.32	3.52152	0.322902	199	20.8	392000
BHX_4s_18 - 2	25.042	0.0033	0.0013	0.00055	4.3e-05	-0.42515	0.05	0.019	0.44057	3.8e-05	5.6e-05	3.54	0.28	3.62982	0.283991	303	12	577000
BHX_4s_19 - 1	5.5116	0.0038	0.0045	0.000709	5.1e-05	0.2395	0.056	0.051	0.32664	0.00026	0.00034	4.57	0.33	4.62581	0.333513	170	6.7	236100
BHX_4s_19 - 2	25.042	0.0036	0.0026	0.00064	6.3e-05	-0.15774	0.041	0.031	0.13123	0.00026	0.00015	4.13	0.41	4.19572	0.413349	148	4	244000
BHX_4s_20 - 1	25.042	0.0038	0.0011	0.000562	3.2e-05	-0.12662	0.055	0.016	0.36271	0.00024	0.00011	3.62	0.21	3.70524	0.211292	482	23.9	899000
BHX_4s_20 - 2	25.162	0.0023	0.0017	0.000545	5.9e-05	-0.014384	0.038	0.024	0.26587	5.8e-05	8e-05	3.51	0.38	3.59848	0.3897	145	4.9	276000
BHX_4s_21 - 1	9.9448	0.0032	0.0036	0.00067	0.00012	-0.17114	0.047	0.046	0.53948	0.00013	0.00018	4.31	0.79	4.39583	0.787435	155	5.3	230200
BHX_4s_21 - 2	25.042	0.0043	0.0015	0.000617	5e-05	0.11063	0.05	0.017	0.070789	0.000189	8.8e-05	3.97	0.32	4.04371	0.328192	350	17.7	602000
BHX_4s_22 - 1	25.042	0.0085	0.0031	0.000515	6.2e-05	0.32588	0.119	0.04	0.017881	5e-05	0.00011	3.32	0.4	3.39993	0.409502	125	14.7	253600
BHX_4s_23 - 1	25.162	0.0048	0.0037	0.000566	6.8e-05	-0.027263	0.062	0.052	0.21896	0.00052	0.00036	3.65	0.44	3.73119	0.448418	128	6.8	238000
BHX_4s_23 - 2	25.042	0.0048	0.0016	0.000595	4.8e-05	0.38113	0.06	0.021	0.27577	0.00039	0.00018	3.84	0.31	3.9169	0.309636	260	14.1	445500
BHX_4s_24 - 1	25.042	0.004	0.0016	0.000576	3.3e-05	-0.35443	0.053	0.022	0.47883	0.0002	0.00012	3.71	0.22	3.79543	0.217756	274	14.5	492800
BHX_4s_25 - 1	25.042	0.0051	0.002	0.00068	5e-05	-0.058609	0.049	0.02	0.15724	0.000157	9.8e-05	4.38	0.32	4.44271	0.327347	237	11.9	363000
BHX_4s_25 - 2	25.162	0.00285	0.00086	0.000535	3.3e-05	-0.21117	0.036	0.011	0.31661	0.000167	6.8e-05	3.45	0.21	3.52782	0.211404	571	23.8	1127000
BHX_4s_26 - 1	25.042	0.0031	0.0016	0.000547	4.9e-05	-0.01629	0.037	0.023	0.14799	8.4e-05	7.1e-05	3.52	0.32	3.60056	0.322875	202	8	364000
BHX_4s_26 - 2	25.042	0.0036	0.0012	0.000558	2.6e-05	-0.068478	0.044	0.016	0.19122	0.000104	5.1e-05	3.6	0.17	3.65781	0.171654	603	26.5	1160000
BHX_4s_27 - 1	25.042	0.0047	0.002	0.000669	5.2e-05	0.034747	0.051	0.023	0.17831	0.00012	0.00012	4.31	0.34	4.37674	0.340726	278	14.7	437000
BHX_4s_28 - 1	25.162	0.003	0.0015	0.000582	5e-05	-0.11101	0.038	0.02	0.2553	0.00023	0.00015	3.75	0.32	3.84079	0.330089	231	8.5	406400
BHX_4s_28 - 2	25.162	0.00426	0.00091	0.00055	3.2e-05	-0.10506	0.055	0.012	0.48963	0.000169	5.5e-05	3.54	0.21	3.60901	0.210861	857	50	1638000
BHX_4s_29 - 1	25.042	0.0071	0.0037	0.000637	8.7e-05	-0.021546	0.087	0.048	0.40379	-2e-05	0.00012	4.11	0.56	4.1859	0.571843	107	9.5	176200
BHX_4s_30 - 1	25.281	0.0049	0.0022	0.000539	5.5e-05	-0.039996	0.068	0.03	0.28676	0.00027	0.00014	3.47	0.35	3.55706	0.363148	183	8.5	339000
BHX_4s_30 - 2	25.042	0.007	0.0021	0.000541	4.8e-05	0.24462	0.086	0.028	-0.17315	0.00024	0.00015	3.49	0.31	3.5717	0.317083	184	18	359000
BHX_4s_31 - 1	25.042	0.0036	0.0029	0.000683	7.1e-05	0.083507	0.039	0.037	0.36161	0.00027	0.00013	4.4	0.46	4.45567	0.463786	129	4.4	201000
BHX_4s_31 - 2	25.162	0.0025	0.0032	0.000646	6.7e-05	0.038224	0.024	0.044	-0.30591	0.00015	0.00016	4.16	0.43	4.2425	0.440214	92	2.6	148500
BHX_4s_32 - 1	25.042	0.0067	0.0025	0.000648	7e-05	-0.057934	0.075	0.029	0.35404	7.9e-05	9e-05	4.18	0.45	4.25573	0.459913	178	12	282000
BHX_4s_32 - 2	25.162	0.004	0.0013	0.000599	3e-05	-0.020951	0.046	0.016	0.2665	0.000152	6e-05	3.86	0.19	3.92547	0.190997	416	19.8	722000
BHX_4s_33 - 1	25.042	0.0043	0.0019	0.000542	5.3e-05	0.15818	0.066	0.029	0.19729	0.00016	0.00011	3.49	0.34	3.57426	0.349732	162	10.3	309000
BHX_4s_35 - 1	25.042	0.0035	0.0015	0.000566	5.9e-05	-0.14762	0.046	0.022	0.46953	0.0001	8.7e-05	3.65	0.38	3.73159	0.389148	213	10.7	411000
BHX_4s_35 - 2	17.254	0.0039	0.0011	0.000568	2.8e-05	0.17679	0.049	0.012	0.023535	0.000189	6.5e-05	3.66	0.18	3.7268	0.184648	856	43	1478000
BHX_4s_36 - 1	25.042	0.0035	0.0014	0.00054	5e-05	0.20448	0.05	0.02	-0.023406	0.00019	0.00015	3.48	0.32	3.56154	0.330002	216	9.8	414000
BHX_4s_36 - 2	25.162	0.0045	0.0016	0.000566	4.3e-05	0.10387	0.061	0.022	0.10838	0.00021	0.00013	3.65	0.28	3.73058	0.277077	241	13.4	448000
BHX_4s_37 - 2	25.042	0.0037	0.0015	0.000555	5.3e-05	-0.047312	0.045	0.02	0.20811	0.00028	0.00015	3.58	0.34	3.65671	0.349438	257	11.8	483000
BHX_4s_38 - 1	25.042	0.0035	0.0014	0.000544	3.5e-05	0.20156	0.047	0.019	0.11033	0.00028	0.00014	3.51	0.23	3.5924	0.231358	318	15.1	612000
BHX_4s_38 - 2	25.162	0.0036	0.0012	0.000558	4.2e-05	-0.20096	0.05	0.017	0.42242	0.00015	0.0001	3.6	0.27	3.68161	0.270725	303	15.3	584000
BHX_4s_39 - 1	25.042	0.0049	0.0022	0.000626	7.1e-05	-0.1943	0.069	0.029	0.1407	0.00014	0.00014	4.03	0.46	4.10194	0.465585	131	9.2	230000
BHX_4s_39 - 2	25.162	0.0055	0.0026	0.000659	5.3e-05	0.31199	0.067	0.033	0.37697	0	1	4.24	0.34	4.33581	0.342265	198	11.2	305000
BHX_4s_40 - 1	25.042	0.0058	0.0013	0.000566	5.8e-05	0.036179	0.087	0.023	0.37368	0.00028	0.00019	3.65	0.37	3.73837	0.383183	167	13.1	319000
BHX_4s_40 - 2	25.042	0.008	0.0034	0.000557	6.3e-05	0.18645	0.111	0.048	0.15085	0.00027	0.00015	3.59	0.41	3.67522	0.415827	161	15.5	294000
BHX_4s_41 - 2	16.295	0.0065	0.0026	0.000634	8.3e-05	-0.44466	0.075	0.037	0.79212	0	1	4.08	0.53	4.1735	0.546466	220	16	371000
BHX_4s_42 - 1	25.162	0.0029	0.0014	0.000593	7.5e-05	-0.11348	0.042	0.021	0.33843	9e-05	8.6e-05	3.82	0.48	3.89954	0.49339	143	6.7	252000
BHX_4s_43 - 1	25.162	0.0059	0.0026	0.000606	6.1e-05	0.13516	0.076	0.034	0.49274	0	1	3.9	0.39	3.99695	0.39583	128	9.3	223000
BHX_4s_43 - 2	25.162	0.0041	0.001	0.000515	3.2e-05	-0.094534	0.054	0.013	0.41056	0.00021	0.0001	3.32	0.2	3.39465	0.20486	380	19.7	756000
BHX_4s_44 - 1	25.042	0.004	0.0026	0.000485	5.6e-05	-0.14877	0.066	0.043	0.5881	0.00027	0.00025	3.13	0.36	3.21573	0.371404	134	8.9	285000
BHX_4s_44 - 2	25.162	0.0035	0.0013	0.000571	3.7e-05	0.099867	0.05	0.018	0.088716	0.00013	0.00012	3.68	0.24	3.76744	0.244328	294	12.9	528000
BHX_4s_45 - 1	22.765	0.0093	0.0034	0.000584	6.7e-05	0.20758	0.11	0.045	-0.12721	0.00035	0.00032	3.76	0.43	3.8544	0.442287	125	16	230000
BHX_4s_45 - 2	10.304	0.0035	0.0013	0.00062	6.5e-05	-0.32419	0.036	0.013	0.61582	0.0002	0.00015	4	0.42	4.07752	0.427658	425	17.7	764000
BHX_4s_47 - 1	25.162	0.0012	0.0022	0.000675	6.9e-05	-0.44605	0.001	0.022	0.21739	0.00012	0.00014	4.35	0.45	4.43926	0.453893	131	-0.6	211000
BHX_4s_47 - 2	25.042	0.004	0.0017	0.00057	5.1e-05	0.10264	0.055	0.024	0.025596	0.000116	9.5e-05	3.67	0.33	3.76304	0.330219	247	13.2	448000
BHX_4s_48 - 1	25.042	0.0059	0.0018	0.000597	4.5e-05	0.1874	0.072	0.022	0.0035813	0.00016	0.00011	3.85	0.29	3.93597	0.290249	305	22.3	536000
BHX_4s_48 - 2	25.042	0.0028	0.0011	0.000589	3.3e-05	-0.13589	0.037	0.015	0.30162	0.000208	8.3e-05	3.79	0.21	3.87059	0.210828	438	15.3	779000
BHX_4s_49 - 1	25.162	0.0033	0.0019	0.000612	5.6e-05	0.20732	0.042	0.025	-0.038425	0.00013	0.00011	3.94	0.36	4.02443	0.361902	226	9.2	384000
BHX_4s_49 - 2	25.042	0.006	0.0021	0.00059	4e-05	0.074738	0.07	0.027	0.097435	0.00018	9.9e-05	3.8	0.26	3.87708	0.263285	241	17.5	427000
BHX_4s_50 - 1	25.162	0.0042	0.0019	0.000606	5.9e-05	-0.012129	0.052	0.025	0.24198	7.9e-05	8.9e-05	3.91	0.38	3.99398	0.388973	199	9.9	344000
BHX_4s_50 - 2	25.042	0.0025	0.0015	0.000586	5.4e-05	0.052324	0.031	0.021	-0.19152	7e-05	0.0002	3.77	0.35	3.8645	0.35625	199	6.4	352000
BHX_4s_51 - 1	25.042	0.0038	0.0018	0.000572	4.7e-05	-0.17008	0.047	0.026	0.35991	7.3e-05	6.4e-05	3.68	0.3	3.76412	0.309598	214	9.5	394000
BHX_4s_51 - 2	25.042	0.0043	0.0015	0.000585	4.8e-05	0.25384	0.057	0.019	-0.12893	0.00023	0.00015	3.77	0.31	3.85517	0.316511	216	11.4	389000
BHX_4s_52 - 1	25.162	0.0033	0.0011	0.000562	5.8e-05	-0.11923	0.049	0.019	0.060228	0.00031	0.00014	3.62	0.38	3.70409	0.382462	222	9.6	416000
BHX_4s_52 - 2	25.281	0.00318	0.00083	0.000539	3.1e-05	0.07603	0.043	0.011	0.26671	0.000154	6.1e-05	3.48	0.2	3.52773	0.20426	446	18.9	861000
BHX_4s_53 - 1	25.162	0.0074	0.0036	0.000676	6.8e-05	-0.012418	0.076	0.039	0.016007	0.0003	0.00027	4.36	0.44	4.43928	0.440152	134	11.3	196000
BHX_4s_53 - 2	25.162	0.0053	0.0033	0.00067	8.2e-05	0.072341	0.071	0.042	0.40965	0.0001	0.00013	4.32	0.53	4.40225	0.538904	117	7.7	185000
BHX_4s_54 - 1	25.281	0.0053	0.0014	0.00055	3.6e-05	-0.020312	0.071	0.019	0.21476	0.0002	0.00011	3.54	0.23	3.63248	0.237962	366	26.2	682000
BHX_4s_54 - 2	25.042	0.0072	0.0019	0.000572	4.6e-05	0.034528	0.098	0.03	0.13818	0.000157	9e-05	3.69	0.3	3.76825	0.303285	303	27.7	570000
BHX_4s_55 - 1	25.042	0.0051	0.0015	0.000572	5.2e-05	0.089998	0.067	0.02	0.25921	0.00023	0.00013	3.69	0.34	3.77456	0.343279	266	17.2	494000
BHX_4s_55 - 2	25.042	0.006	0.0016	0.000574	4.4e-05	0.057896	0.08	0.023	0.1242	7.3e-05	6.9e-05	3.7	0.28	3.78452	0.283716	241	17.4	431000
BHX_4s_56 - 1	25.162	0.0078	0.003	0.000522	5.1e-05	-0.047542	0.109	0.044	0.44533	4e-05	0.00014	3.36	0.33	3.44821	0.337081	133	14.7	267000
BHX_4s_56 - 2	25.042	0.0075	0.0026	0.000587	6.4e-05	-0.065887	0.107	0.038	0.52741	0.00017	0.00015	3.78	0.41	3.86614	0.421684	170	16	307000
BHX_4s_57 - 1	25.042	0.0026	0.0019	0.000523	4.8e-05	0.13066	0.043	0.03	0.85272	5e-05	0.0001	3.37	0.31	3.45893	0.317597	186	6.7	370600
BHX_4s_57 - 2	25.042	0.0028	0.0015	0.00056	5.2e-05	-0.036486	0.037	0.021	0.27624	0.00029	0.00014	3.61	0.33	3.69773	0.343492	308	12.1	616000
BHX_4s_58 - 1	25.042	0.0061	0.0019	0.000576	5.1e-05	0.057137	0.079	0.024	0.21463	0.000145	8.9e-05	3.71	0.33	3.79762	0.33642	239	16.1	453000
BHX_4s_58 - 2	25.042	0.0041	0.0015	0.000562	3.6e-05	-0.0036702	0.063	0.022	0.24179	0.000185	8e-05	3.62	0.23	3.70262	0.237514	343	18.1	622000
BHX_4s_59 - 1	5.5116	0.0054	0.0053	0.00068	8.9e-05	-0.099584	0.046	0.06	0.74212	0.00024	0.00013	4.38	0.57	4.44053	0.581601	274	15	469200
BHX_4s_59 - 2	25.042	0.0037	0.0024	0.000616	7.1e-05	-0.18948	0.069	0.041	0.27799	-5e-05	0.00014	3.97	0.46	4.05286	0.467282	121	8	203700
BHX_4s_60 - 1	25.042	0.0048	0.0019	0.000521	4.6e-05	-0.17791	0.063	0.025	0.16913	4.5e-05	6.3e-05	3.36	0.3	3.44676	0.304461	198	14.4	393000
BHX_4s_60 - 2	25.042	0.00411	0.00086	0.000553	2.4e-05	0.3971	0.052	0.01	-0.19764	0.000222	8.1e-05	3.57	0.15	3.64077	0.152085	670	34.2	1280000
BHX_4s_61 - 1	25.042	0.0049	0.0017	0.000542	5e-05	0.23088	0.081	0.031	0.076672	0.00013	0.0001	3.49	0.32	3.58269	0.330631	198	14.1	385000
BHX_4s_61 - 2	25.162	0.0056	0.001	0.000571	3.2e-05	0.052936	0.074	0.015	0.17428	0.00019	5e-05	3.68	0.21	3.74087	0.210667	787	56	1440000
BHX_4s_62 - 1	25.162	0.0057	0.0018	0.000509	5.1e-05	0.13961	0.086	0.028	0.24204	8.3e-05	6.9e-05	3.28	0.33	3.36694	0.330898	228	18.8	472000
BHX_4s_62 - 2	25.042	0.0038	0.0018	0.000547	4.9e-05	-0.2771	0.059	0.031	0.91295	0.00017	0.00013	3.52	0.32	3.61414	0.323889	197	9.6	377000
BHX_4s_63 - 1	25.042	0.0026	0.0011	0.000572	3e-05	-0.092337	0.031	0.014	0.032889	0.00021	0.00011	3.69	0.19	3.76999	0.198059	334	10.7	613000
BHX_4s_63 - 2	25.042	0.0039	0.0012	0.00056	3.6e-05	0.061283	0.049	0.016	0.1366	0.000258	9.3e-05	3.61	0.23	3.68651	0.237398	519	26	962000
BHX_4s_64 - 1	11.502	0.0068	0.0037	0.00067	0.00013	0.38851	0.071	0.037	0.092482	0	1	4.32	0.84	4.40182	0.854162	220	15.8	320200
BHX_4s_64 - 2	25.042	0.0042	0.00078	0.000568	3e-05	0.21144	0.056	0.01	0.13019	0.000127	6.3e-05	3.66	0.19	3.73765	0.197914	724	38.6	1323000
BHX_4s_65 - 1	25.042	0.0058	0.0013	0.000653	3.9e-05	-0.067429	0.068	0.016	0.26945	0.00018	0.0001	4.21	0.25	4.28748	0.249861	570	38.9	923000
BHX_4s_65 - 2	25.042	0.00417	0.00094	0.000541	2.3e-05	-0.062534	0.056	0.014	0.23118	0.000167	5e-05	3.49	0.15	3.54673	0.145755	642	36.9	1228000
BHX_4s_66 - 1	25.042	0.0017	0.0013	0.000583	3.5e-05	0.14245	0.02	0.017	0.011336	0.00035	0.00016	3.76	0.22	3.83953	0.22424	273	6.1	472000
BHX_4s_66 - 2	25.042	0.0028	0.001	0.000561	3.9e-05	0.2529	0.035	0.013	-0.11018	0.000118	5.1e-05	3.62	0.25	3.69325	0.250547	535	20.7	970000
BHX_4s_67 - 1	19.051	0.0039	0.0015	0.000587	4.1e-05	-0.019747	0.041	0.017	0.26182	0.00022	0.00014	3.78	0.27	3.86109	0.270033	393	17.4	708000
BHX_4s_67 - 2	25.162	0.0058	0.0017	0.000639	3.9e-05	0.22764	0.064	0.018	-0.077991	0.000121	9.4e-05	4.12	0.25	4.19267	0.256343	423	26.5	655000
BHX_4s_68 - 1	22.166	0.0074	0.0027	0.000591	6.3e-05	0.52186	0.081	0.029	-0.34854	8e-05	0.00016	3.81	0.4	3.89966	0.409195	258	25.4	455000
BHX_4s_69 - 1	25.162	0.0034	0.0014	0.000555	3.9e-05	0.26598	0.042	0.017	-0.30063	0.00023	0.00013	3.58	0.25	3.65566	0.257231	263	10.9	498000
BHX_4s_69 - 2	25.042	0.004	0.0018	0.000505	4.6e-05	-0.17682	0.06	0.027	0.36856	0.000109	9.2e-05	3.25	0.3	3.33815	0.304282	174	9.8	349300
BHX_4s_70 - 1	25.162	0.0036	0.0021	0.000575	7e-05	0.08711	0.057	0.036	-0.33802	-1e-05	0.00012	3.71	0.45	3.78414	0.460877	120	6.4	226000
BHX_4s_70 - 2	25.042	0.0045	0.0023	0.000592	6e-05	0.017973	0.054	0.032	0.014777	0.00014	0.00014	3.82	0.39	3.90271	0.395672	136	7.5	241100
BHX_4s_71 - 1	25.042	0.0064	0.002	0.000571	5.1e-05	0.24584	0.071	0.022	-0.0018666	0.00029	0.00013	3.68	0.33	3.76476	0.329847	237	18	439000
BHX_4s_71 - 2	25.162	0.0037	0.0015	0.000563	4.2e-05	0.32642	0.051	0.019	0.032964	0.0002	0.00012	3.63	0.27	3.71422	0.277284	296	13.2	522000
BHX_4s_72 - 1	25.162	0.0072	0.0051	0.000627	9.5e-05	-0.19381	0.15	0.15	0.6954	0.00029	0.00023	4.04	0.61	4.11937	0.624294	90	8.7	159000
BHX_4s_72 - 2	25.162	0.008	0.0025	0.000607	7.6e-05	0.040439	0.089	0.029	0.41678	0.00025	0.00014	3.91	0.49	3.98453	0.492581	190	20.3	341000
BHX_1b_01 - 3	25.042	0.0078	0.0031	0.000593	6.3e-05	-0.093131	0.096	0.04	0.21378	0.00016	0.00011	3.82	0.4	3.89128	0.407208	184	16.8	321000
BHX_1b_01 - 4	25.042	0.0059	0.0019	0.000538	4e-05	-0.018128	0.086	0.028	0.1861	0.00017	0.00014	3.47	0.26	3.5509	0.264254	207	16.3	394000
BHX_1b_03 - 3	25.162	0.0083	0.0026	0.000591	5.9e-05	0.065859	0.097	0.035	0.28697	0.00015	0.00015	3.81	0.38	3.87605	0.380823	164	16.2	293000
BHX_1b_03 - 4	25.042	0.0041	0.0011	0.000598	3.5e-05	0.22361	0.05	0.014	0.17678	0.00027	0.00012	3.86	0.23	3.93855	0.230786	473	22.8	826000
BHX_1b_04 - 3	25.281	0.0082	0.0041	0.00062	0.00011	-0.0016029	0.097	0.056	-0.12638	0.00015	0.00014	4.02	0.74	4.07921	0.723825	125	11.3	199700
BHX_1b_04 - 4	25.162	0.0062	0.0037	0.000584	7.7e-05	-0.18163	0.091	0.054	0.25694	0.00044	0.00029	3.76	0.49	3.84543	0.507165	77	6.3	135000
BHX_1b_04 - 5	25.401	0.0023	0.0015	0.000586	4.6e-05	-0.1343	0.02	0.017	0.15897	0.00021	0.00013	3.78	0.29	3.85926	0.296597	216	6	381200
BHX_1b_05 - 3	25.281	0.0049	0.0025	0.000622	6e-05	0.24296	0.062	0.031	-0.16672	0.00018	0.00016	4.01	0.38	4.09202	0.388324	182	10.4	320000
BHX_1b_05 - 4	25.162	0.0053	0.0025	0.000666	7.7e-05	0.021372	0.049	0.027	0.3489	0.00013	0.0002	4.29	0.5	4.37806	0.506287	139	6.7	215000
BHX_1b_05 - 5	25.162	0.0029	0.0012	0.000554	4.4e-05	-0.054987	0.036	0.015	0.28033	0.000133	9.1e-05	3.57	0.29	3.65458	0.290472	236	9.9	429600
BHX_1b_06 - 3	25.042	0.0047	0.0024	0.00057	6.2e-05	0.15659	0.059	0.029	0.037187	0.00029	0.00024	3.67	0.4	3.75943	0.409057	150	8.4	283000
BHX_1b_06 - 4	25.162	0.0051	0.0021	0.000561	3.9e-05	0.011795	0.071	0.029	0.35043	4.9e-05	4.2e-05	3.62	0.25	3.68793	0.256877	280	18	507000
BHX_1b_07 - 4	13.539	0.0045	0.0025	0.000525	6.4e-05	0.23818	0.05	0.03	-0.00031496	0.00044	0.00024	3.38	0.41	3.46283	0.422339	205	11.9	353000
BHX_1b_08 - 3	15.576	0.007	0.0025	0.000646	6.6e-05	-0.33917	0.09	0.04	0.48215	0.00027	0.00019	4.16	0.42	4.23602	0.426523	318	28	490000
BHX_1b_08 - 4	25.042	0.0027	0.0015	0.000575	5.3e-05	0.081483	0.033	0.019	-0.12122	0.00018	0.00017	3.7	0.34	3.7875	0.349322	210	6.8	370100
BHX_1b_09 - 3	25.042	0.0038	0.0037	0.000542	6.8e-05	0.0013256	0.045	0.056	-0.055354	0.00025	0.00021	3.5	0.44	3.56903	0.448009	102	5.2	193800
BHX_1b_10 - 3	25.042	-0.0004	0.0022	0.000598	9.2e-05	-0.26297	0.019	0.044	0.93322	0.00017	0.0003	3.86	0.59	3.94055	0.606326	95	1	170000
BHX_1b_10 - 4	25.042	0.0035	0.0022	0.000565	5.6e-05	-0.018684	0.055	0.037	-0.0034921	0.00023	0.00016	3.64	0.36	3.72598	0.369465	201	8.1	370000
BHX_1b_11 - 3	14.138	-0.0004	0.0025	0.0005	0.0001	-0.42636	0.015	0.058	0.20355	0.00019	0.0002	3.24	0.65	3.30855	0.66179	115	1.3	225100
BHX_1b_11 - 4	25.042	0.0086	0.0035	0.000595	8.1e-05	0.16035	0.106	0.05	0.39727	0.00028	0.00023	3.84	0.52	3.92528	0.534439	111	10.9	188600
BHX_1b_12 - 4	25.042	0.0064	0.0036	0.000621	8.7e-05	-0.035833	0.108	0.064	0.8586	0.00032	0.00024	4	0.56	4.09289	0.573469	103	8.5	175000
BHX_1b_12 - 5	25.042	0.0037	0.0015	0.00055	3.3e-05	0.060537	0.039	0.019	0.15588	0.00024	0.00012	3.55	0.21	3.63325	0.2182	307	13.5	566000
BHX_1b_13 - 5	25.162	0.0046	0.0013	0.000597	5.1e-05	-0.13394	0.065	0.019	0.46143	0.00022	0.00013	3.85	0.33	3.93598	0.336378	325	18.1	559000
BHX_1b_14 - 3	25.162	0.0036	0.0015	0.000582	5.1e-05	-0.11969	0.041	0.017	-0.010161	0.00047	0.00022	3.75	0.33	3.84159	0.336748	222	9.7	387000
BHX_1b_14 - 4	25.162	0.002	0.0016	0.000564	5.4e-05	0.057673	0.021	0.018	0.00021389	0.00039	0.00025	3.63	0.35	3.72403	0.350076	146	3.8	260000
BHX_1b_15 - 3	25.042	0.0056	0.0033	0.000607	7.3e-05	-0.065954	0.059	0.038	-0.10937	0.00023	0.0002	3.91	0.47	3.99648	0.480761	114	8.2	199000
BHX_1b_15 - 4	25.042	0.0014	0.0029	0.000557	7.8e-05	-0.032657	0.025	0.048	-0.46876	0.0006	0.00035	3.59	0.5	3.67623	0.514908	83	1.4	157900
Quartz Diorite
BHX5_1_ - 1	26.411	0.0038	0.0057	0.00092	0.00015	-0.13967	0.18	0.23	-0.99989	0.00039	0.00028	5.95	0.95	6.00453	0.979118	89	4.9	100500
BHX5_1_ - 2	25.395	0.0058	0.0074	0.00098	0.00013	0.050628	0.026	0.066	0.61261	-0.00016	0.00024	6.31	0.82	6.39083	0.847904	96	4.3	100800
BHX5_3_ - 1	28.966	0.025	0.017	0.00108	0.00021	-0.082468	0.14	0.35	0.059816	0.00012	0.00033	6.9	1.4	7.03966	1.3689	64	9.7	57500
BHX5_3_ - 2	28.741	0.0079	0.0083	0.00095	0.00024	0.023358	-0.17	0.26	0.34288	0.00058	0.00042	6.1	1.5	6.2038	1.56733	53	2.5	52200
BHX5_4_ - 1	26.896	0.0078	0.0058	0.00094	0.00015	-0.19447	0.11	0.15	0.53269	0.00022	0.00026	6.04	0.94	6.13329	0.978837	83	5.7	90900
BHX5_5_ - 1	26.664	0.0069	0.0048	0.001013	9.2e-05	0.12531	0.065	0.039	-0.066854	0.00014	0.00013	6.53	0.59	6.6005	0.599684	147	7.7	153000
BHX5_6_ - 1	24.721	0.0085	0.0094	0.0009	0.00017	0.095259	0.12	0.11	-0.013372	0.00024	0.00037	5.8	1.1	5.88128	1.11099	57	3.9	64800
BHX5_6_ - 2	25.602	0.003	0.015	0.00099	0.00021	-0.067791	0.08	0.16	-0.4585	0.00017	0.00049	6.4	1.4	6.47085	1.37264	44	0.2	47100
AusZ7_1
AUSZ7-1 - 1	25.082	0.0389	0.0032	0.005986	9.7e-05	0.22405	0.047	0.0037	-0.022306	0.00184	0.00031	38.47	0.62	NA	NA	6490	296	1129000
AUSZ7-1 - 2	25.047	0.039	0.0036	0.0061	0.00013	-0.056967	0.0462	0.0043	0.28287	0.00198	0.00039	39.2	0.85	NA	NA	6170	284	1081000
AUSZ7-1 - 3	25.072	0.0399	0.0027	0.00589	0.00013	0.055294	0.0495	0.0032	0.24148	0.00157	0.00031	37.86	0.83	NA	NA	5280	263	953000
AUSZ7-1 - 4	25.089	0.0409	0.0033	0.00597	0.00011	0.071394	0.0503	0.004	0.13164	0.00171	0.00033	38.37	0.7	NA	NA	5220	258	939000
AUSZ7-1 - 5	25.065	0.0371	0.0031	0.0059	0.00014	-0.048975	0.0452	0.0037	0.29383	0.00186	0.00034	37.95	0.88	NA	NA	6080	269	1078000
AUSZ7-1 - 6	25.054	0.0392	0.0038	0.00599	0.00016	-0.074652	0.0478	0.0047	0.34593	0.0017	0.00031	38.5	1	NA	NA	4460	210	791000
AUSZ7-1 - 7	25.057	0.042	0.0034	0.00601	0.00012	-0.0050718	0.0503	0.004	0.2404	0.00208	0.00031	38.61	0.75	NA	NA	5900	289	1018000
AUSZ7-1 - 8	25.137	0.0379	0.0029	0.00598	0.00013	0.3236	0.0458	0.0033	-0.12885	0.00182	0.00031	38.46	0.82	NA	NA	4940	224	870000
AUSZ7-1 - 9	25.067	0.0407	0.0033	0.00599	0.00013	0.031012	0.0486	0.0046	0.20573	0.00185	0.00042	38.52	0.83	NA	NA	4380	218	773000
AUSZ7-1 - 10	12.509	0.0386	0.0033	0.00595	0.0002	0.14149	0.0469	0.004	0.188	0.00123	0.00033	38.2	1.3	NA	NA	4970	232	937000
AUSZ7-1 - 11	25.1	0.0387	0.0031	0.00606	0.00012	0.14899	0.0446	0.0033	0.21394	0.0018	0.00038	38.95	0.76	NA	NA	5390	245	924000
AUSZ7-1 - 12	25.103	0.0398	0.0035	0.0062	0.00012	0.070022	0.0462	0.0039	0.22554	0.00202	0.00041	39.88	0.8	NA	NA	5270	248	882000
AUSZ7-1 - 13	17.238	0.0373	0.0034	0.00604	0.00014	0.04963	0.0458	0.0045	0.13295	0.0018	0.00045	38.83	0.89	NA	NA	4890	220	862000
AUSZ7-1 - 14	14.241	0.0373	0.0039	0.00605	0.00015	-0.0082049	0.0453	0.0049	0.29036	0.00195	0.00058	38.87	0.97	NA	NA	4520	200	799000
AUSZ7-1 - 15	25.074	0.0403	0.0029	0.00604	0.00012	0.051873	0.0494	0.0033	0.18896	0.00232	0.00038	38.85	0.79	NA	NA	4980	239	846000
AUSZ7-1 - 16	25.06	0.0404	0.0028	0.0061	0.00013	-0.092455	0.0483	0.0036	0.3753	0.0019	0.00039	39.23	0.81	NA	NA	5180	241	881000
AUSZ7-1 - 17	25.111	0.0378	0.0029	0.00587	0.00011	0.0004941	0.047	0.0036	0.24801	0.00169	0.00034	37.74	0.72	NA	NA	4770	222	852000
AUSZ7-1 - 18	25.054	0.0375	0.0048	0.00599	0.00015	0.36728	0.0437	0.0053	0.21277	0.00205	0.00041	38.47	0.95	NA	NA	5140	223	913000
AusZ7_5
AUSZ7-5 - 1	25.042	0.00259	0.0009	0.00037	2.9e-05	-0.020903	0.048	0.016	0.35519	0.000137	7.1e-05	2.39	0.19	NA	NA	341	16.9	949000
AUSZ7-5 - 2	16.839	0.0035	0.0013	0.000367	3.6e-05	-0.21317	0.07	0.028	0.86691	8e-05	5.9e-05	2.37	0.23	NA	NA	296	20.4	804000
AUSZ7-5 - 3	25.053	0.00312	0.00081	0.000368	2.1e-05	-0.10189	0.068	0.019	0.18923	5.7e-05	4.9e-05	2.37	0.14	NA	NA	313	19.1	892000
AUSZ7-5 - 4	21.506	0.00305	0.00089	0.000379	2.9e-05	-0.12013	0.063	0.02	0.52349	7.4e-05	4.4e-05	2.44	0.19	NA	NA	332	17.8	908000
AUSZ7-5 - 5	25.054	0.00338	0.0008	0.000383	2.3e-05	-0.13705	0.066	0.017	0.27394	0.000119	4.9e-05	2.47	0.15	NA	NA	309	19.8	865000
AUSZ7-5 - 6	25.159	0.0025	0.0011	0.000368	1.8e-05	0.11363	0.055	0.023	0.067241	0.000169	7.6e-05	2.37	0.12	NA	NA	307	17	873000
AUSZ7-5 - 7	22.912	0.0033	0.0011	0.000394	3.2e-05	0.26715	0.06	0.019	0.037154	9.4e-05	5.6e-05	2.54	0.21	NA	NA	377	21.3	988000
AUSZ7-5 - 8	25.071	0.00231	0.00064	0.000372	3.7e-05	0.03172	0.046	0.014	0.0495	0.000106	5.6e-05	2.4	0.24	NA	NA	321	14.7	919000
AUSZ7-5 - 9	25.048	0.0026	0.00093	0.000344	2.8e-05	0.13796	0.054	0.02	0.31367	4.9e-05	3.6e-05	2.21	0.18	NA	NA	276	14.6	844000
AUSZ7-5 - 10	16.556	0.0037	0.0012	0.000357	3.7e-05	0.20295	0.073	0.024	-0.078067	0.000118	7.5e-05	2.3	0.24	NA	NA	281	20.8	815000
AUSZ7-5 - 11	25.188	0.0025	0.0011	0.000376	3.5e-05	0.16216	0.045	0.022	-0.12657	0.000159	6.8e-05	2.42	0.22	NA	NA	270	13.2	763000
AUSZ7-5 - 12	25.048	0.0026	0.001	0.000355	2.8e-05	-0.030548	0.061	0.028	0.98136	0.00015	7e-05	2.29	0.18	NA	NA	275	14.1	806000
AUSZ7-5 - 13	25.086	0.00287	0.00093	0.000377	2.6e-05	-0.42654	0.064	0.021	0.49112	0.000152	5.6e-05	2.43	0.17	NA	NA	278	15.9	755000
AUSZ7-5 - 14	13.743	0.0031	0.0014	0.000354	3.1e-05	0.0052381	0.063	0.029	0.22034	9.1e-05	5.6e-05	2.28	0.2	NA	NA	298	18.5	909000
AUSZ7-5 - 15	25.073	0.0035	0.0014	0.000384	2.6e-05	0.061965	0.07	0.029	0.21053	7e-05	4.8e-05	2.48	0.17	NA	NA	297	18.9	781000
AUSZ7-5 - 16	25.123	0.0032	0.001	0.000347	3.2e-05	-0.0063366	0.064	0.02	0.19989	0.000147	6.5e-05	2.24	0.21	NA	NA	256	16.1	788000
AUSZ7-5 - 17	25.18	0.0036	0.0011	0.000377	3.6e-05	0.46706	0.074	0.022	0.11794	8.8e-05	5.1e-05	2.43	0.23	NA	NA	248	16.1	702000
GJ-1
GJ-1 - 1	24.997	0.8086	0.015	0.09824	0.0011	0.2499	0.05995	0.00081	0.2862	0.0306	0.002	604.1	6.4	NA	NA	290300	17170	3090000
GJ-1 - 2	19.278	0.806	0.018	0.09842	0.0012	-0.14379	0.0592	0.0011	0.50221	0.0338	0.0029	605.1	6.8	NA	NA	257400	15260	2633000
GJ-1 - 3	25.034	0.817	0.015	0.09863	0.0011	0.3015	0.0603	0.00072	0.41327	0.0306	0.0027	606.4	6.4	NA	NA	275200	16500	2970000
GJ-1 - 4	25.036	0.818	0.017	0.09878	0.0012	0.62799	0.06038	0.00063	0.0030769	0.029	0.0023	607.2	7.3	NA	NA	272600	16310	2910000
GJ-1 - 5	25.025	0.8296	0.015	0.09948	0.001	-0.12194	0.06051	0.00075	0.61603	0.032	0.0028	611.4	6.1	NA	NA	268300	16120	2860000
GJ-1 - 6	25.029	0.8234	0.016	0.09919	0.0011	0.41175	0.06004	0.00072	0.14185	0.0307	0.0024	609.7	6.5	NA	NA	272500	16230	2870000
GJ-1 - 8	25.06	0.8086	0.015	0.0978	0.0012	0.34059	0.0597	0.0007	0.32622	0.0296	0.0024	601.5	6.9	NA	NA	258100	15270	2750000
GJ-1 - 9	25.146	0.819	0.016	0.09877	0.0011	0.33694	0.05974	0.00088	0.10892	0.0305	0.0026	607.2	6.3	NA	NA	259400	15260	2760000
GJ-1 - 10	25.116	0.813	0.017	0.09814	0.001	0.35635	0.06005	0.00087	0.054452	0.0284	0.0023	603.5	6.1	NA	NA	258500	15380	2770000
GJ-1 - 11	15.747	0.816	0.02	0.0987	0.0015	0.25158	0.0605	0.0012	0.30434	0.0326	0.0036	606.9	8.6	NA	NA	237000	14090	2396000
GJ-1 - 12	25.015	0.8128	0.015	0.09815	0.0011	0.21304	0.05998	0.00087	0.32486	0.0305	0.0022	603.5	6.6	NA	NA	256200	15210	2730000
GJ-1 - 13	15.491	0.823	0.017	0.09873	0.0012	-0.16947	0.06045	0.00093	0.89432	0.0282	0.0024	606.9	7.2	NA	NA	268600	16080	2930000
GJ-1 - 14	18.211	0.828	0.018	0.09906	0.0012	0.51878	0.06076	0.00096	-0.07221	0.0311	0.0025	608.9	7.1	NA	NA	251400	14900	2610000
GJ-1 - 15	25.054	0.808	0.016	0.09855	0.0011	0.32961	0.05976	0.00086	0.1826	0.031	0.0026	605.9	6.2	NA	NA	249700	14730	2620000
GJ-1 - 16	25.077	0.8164	0.014	0.09876	0.0011	0.459	0.06045	0.00064	0.20274	0.0335	0.0027	607.1	6.3	NA	NA	244600	14530	2580000
GJ-1 - 17	25.017	0.8158	0.015	0.09873	0.0011	0.32513	0.06009	0.00072	0.29571	0.0294	0.0026	606.9	6.4	NA	NA	246000	14590	2580000
GJ-1 - 18	22.663	0.822	0.016	0.09845	0.0012	0.27665	0.06087	0.00094	0.28939	0.0292	0.0028	605.3	7	NA	NA	251100	15010	2700000
Plesovice
Plesovice - 1	24.804	0.536	0.015	0.05389	0.00066	0.62858	0.0721	0.0016	-0.32465	0.0418	0.002	338.3	4	NA	NA	295100	21120	5750000
Plesovice - 2	22.512	0.3949	0.0075	0.05418	0.00069	0.025174	0.05309	0.00079	0.59499	0.01731	0.001	340.1	4.2	NA	NA	298100	15870	5890000
Plesovice - 3	25.06	0.3928	0.0075	0.05432	0.00061	0.23479	0.05289	0.00079	0.28312	0.01623	0.00074	341	3.7	NA	NA	269700	14160	5260000
Plesovice - 4	25.057	0.3909	0.008	0.05397	0.00066	0.48286	0.0531	0.00075	0.054662	0.01661	0.00088	338.9	4	NA	NA	278900	14650	5450000
Plesovice - 5	25.086	0.3934	0.0073	0.05368	0.00066	0.12617	0.05331	0.00083	0.64784	0.01672	0.0011	337.1	4	NA	NA	270300	14370	5350000
Plesovice - 6	25.017	0.383	0.0076	0.05208	0.00057	0.33595	0.05297	0.00074	0.30878	0.01687	0.00076	327.3	3.5	NA	NA	358000	18970	7200000
Plesovice - 7	8.5331	0.388	0.014	0.05336	0.00094	0.75657	0.0523	0.0011	-0.44853	0.0165	0.0012	335.1	5.7	NA	NA	280900	14810	5160000
Plesovice - 8	21.345	0.3923	0.0084	0.05366	0.00067	0.4084	0.0528	0.0008	0.07725	0.016	0.0013	336.9	4.1	NA	NA	191000	10050	3670000
Plesovice - 9	25.076	0.3788	0.0071	0.05131	0.0007	0.69589	0.05347	0.00062	0.16038	0.01731	0.00087	322.5	4.3	NA	NA	391000	20800	8030000
Plesovice - 10	11.78	0.3943	0.0079	0.05386	0.00086	0.45292	0.05338	0.00071	0.328	0.01823	0.0011	338.2	5.3	NA	NA	258200	13530	4670000
Plesovice - 11	9.5538	0.391	0.013	0.05369	0.00085	0.61016	0.0534	0.0014	-0.039759	0.0174	0.0014	337.1	5.2	NA	NA	253000	13450	4580000
Plesovice - 12	10.831	0.3936	0.01	0.0543	0.00097	0.80176	0.05259	0.00074	-0.089252	0.0168	0.0011	340.9	5.9	NA	NA	247700	12890	4490000
Plesovice - 13	18.026	0.3906	0.0084	0.05368	0.00066	0.34337	0.05366	0.00083	0.40402	0.018	0.0012	337.1	4	NA	NA	231300	12290	4340000
Plesovice - 14	18.315	0.3928	0.0086	0.05427	0.00063	0.43322	0.05269	0.00084	0.038582	0.0174	0.0014	340.7	3.8	NA	NA	167300	8770	3090000
Plesovice - 15	21.325	0.3947	0.0088	0.05418	0.00064	0.066858	0.05291	0.00096	0.45556	0.01797	0.00094	340.1	3.9	NA	NA	172000	9000	3240000
Plesovice - 16	18.866	0.3943	0.0089	0.0543	0.00065	0.45614	0.05262	0.00078	-0.084986	0.017	0.0011	340.9	4	NA	NA	177200	9240	3210000
Plesovice - 17	17.585	0.3941	0.0076	0.05407	0.00064	0.20987	0.05287	0.00089	0.28059	0.0171	0.0011	339.4	3.9	NA	NA	178200	9220	3270000
Plesovice - 18	25.047	0.3962	0.0083	0.05401	0.00074	0.70316	0.05375	0.00065	-0.074739	0.01666	0.0011	339.1	4.5	NA	NA	178600	9480	3340000
Temora
Temora - 1	18.852	0.4948	0.011	0.06638	0.00079	0.17096	0.0543	0.00095	0.27293	0.02076	0.00096	414.3	4.8	NA	NA	94300	5120	1417000
Temora - 2	14.829	0.517	0.018	0.06724	0.00083	-0.0056212	0.0561	0.0017	0.36787	0.0215	0.0012	419.5	5	NA	NA	93600	5250	1539000
Temora - 3	25.071	0.512	0.016	0.06703	0.001	0.25149	0.0554	0.0017	0.14975	0.0205	0.0017	418.2	6.1	NA	NA	41350	2278	655000
Temora - 4	25.061	0.5097	0.01	0.0673	0.00079	0.20983	0.05521	0.00083	0.29643	0.02083	0.00082	419.9	4.8	NA	NA	112800	6200	1790000
Temora - 5	25.036	0.51	0.014	0.06714	0.00081	0.58674	0.0548	0.0011	-0.21671	0.02	0.0012	418.9	4.9	NA	NA	94400	5150	1500000
Temora - 6	19.62	0.5199	0.012	0.06726	0.001	0.26718	0.0556	0.0012	0.54586	0.0213	0.0013	419.6	6.1	NA	NA	63900	3570	1027000
Temora - 7	25.057	0.511	0.01	0.0671	0.0008	0.39375	0.05564	0.00083	0.18836	0.02123	0.00086	418.7	4.8	NA	NA	193900	10700	2981000
Temora - 8	25.111	0.5045	0.011	0.0674	0.00086	0.21092	0.05431	0.001	0.27818	0.02216	0.0011	420.5	5.2	NA	NA	83500	4480	1291000
Temora - 9	18.752	0.503	0.013	0.06579	0.00083	0.26272	0.0544	0.0011	0.23307	0.02121	0.0011	410.7	5	NA	NA	68610	3691	1107000
Temora - 10	18.53	0.508	0.014	0.06657	0.00098	0.25331	0.0554	0.0013	0.20056	0.0202	0.0015	415.4	5.9	NA	NA	39790	2150	616000
Temora - 11	25.044	0.5368	0.012	0.06671	0.00081	0.29131	0.0587	0.0012	0.138	0.0225	0.0012	416.3	4.9	NA	NA	81800	4730	1278000
Temora - 12	25.029	0.514	0.014	0.06677	0.00076	0.24942	0.0555	0.0014	0.039512	0.02116	0.00097	416.6	4.6	NA	NA	83300	4540	1291000
Temora - 13	25.041	0.5083	0.0098	0.06646	0.00075	0.45656	0.0555	0.00071	0.13603	0.02099	0.00078	414.8	4.5	NA	NA	203600	11150	3190000
Temora - 14	25.091	0.506	0.017	0.06644	0.00087	0.40655	0.0551	0.0016	-0.11059	0.0194	0.0016	414.6	5.2	NA	NA	28600	1563	442000
Temora - 15	26.464	0.5006	0.012	0.06534	0.00073	0.58726	0.05578	0.00092	-0.21895	0.02001	0.00096	408	4.4	NA	NA	77290	4239	1216000
Temora - 16	11.903	0.5	0.014	0.06615	0.00094	0.21902	0.0545	0.0014	0.244	0.02053	0.00098	412.9	5.7	NA	NA	110500	5930	1828000
Temora - 17	26.619	0.502	0.013	0.06604	0.00083	0.071082	0.0555	0.0013	0.32241	0.02145	0.00093	412.2	5	NA	NA	75500	4050	1179000
Temora - 18	26.489	0.506	0.012	0.06711	0.00083	0.35231	0.05484	0.001	0.15607	0.0206	0.00092	418.7	5	NA	NA	108400	5790	1690000
91500
91500 - 1	25.103	1.853	0.038	0.1801	0.0021	0.01329	0.0736	0.0012	0.43799	0.0538	0.0023	1067.3	11	NA	NA	111700	8160	645000
91500 - 2	23.709	1.867	0.045	0.1819	0.0024	0.87722	0.0743	0.0014	0.22839	0.056	0.003	1077.2	13	NA	NA	109600	8120	620000
91500 - 3	25.103	1.875	0.042	0.1814	0.0021	0.34292	0.0745	0.0013	0.22034	0.0538	0.0027	1074.5	12	NA	NA	111900	8270	641000
91500 - 4	25.132	1.851	0.039	0.1791	0.002	0.29028	0.0744	0.0012	0.29931	0.0528	0.0024	1061.9	11	NA	NA	112100	8250	653000
91500 - 5	25.154	1.849	0.042	0.1783	0.0022	0.29354	0.0749	0.0014	0.1858	0.0526	0.0026	1057.5	12	NA	NA	101000	7500	586000
91500 - 6	25.063	1.883	0.039	0.1793	0.0021	0.36269	0.0753	0.0014	-0.0014476	0.0544	0.0024	1063.2	11	NA	NA	110200	8280	638000
91500 - 7	25.073	1.845	0.04	0.1783	0.002	0.20203	0.0752	0.0014	0.2569	0.0534	0.0029	1057.7	11	NA	NA	107600	7990	634000
91500 - 8	25.06	1.876	0.037	0.1782	0.0023	0.35927	0.07623	0.0011	0.31742	0.0521	0.0026	1057.1	12	NA	NA	106700	8070	624000
91500 - 9	25.066	1.865	0.035	0.1802	0.0021	0.46146	0.07552	0.00092	0.13408	0.0542	0.0025	1068.3	12	NA	NA	105300	7880	616000
91500 - 10	25.121	1.839	0.038	0.1794	0.0022	0.20456	0.075	0.0013	0.30981	0.0531	0.0027	1063.4	12	NA	NA	101700	7530	600000
91500 - 11	25.076	1.847	0.044	0.1784	0.0021	0.46234	0.0758	0.0012	0.04576	0.0526	0.0023	1058	11	NA	NA	100600	7550	599000
91500 - 12	25.057	1.833	0.043	0.178	0.0021	0.20203	0.0754	0.0013	0.20907	0.0552	0.0029	1055.8	12	NA	NA	95800	7160	568000
91500 - 13	24.984	1.815	0.038	0.1792	0.002	0.076235	0.0745	0.0013	0.36456	0.055	0.0027	1062.6	11	NA	NA	98200	7220	581000
91500 - 14	14.991	1.85	0.041	0.1802	0.0022	0.31239	0.07473	0.001	0.28349	0.0532	0.0031	1068.1	12	NA	NA	103200	7660	633000
91500 - 15	24.984	1.856	0.042	0.1805	0.002	0.29312	0.0753	0.0013	0.13601	0.0533	0.0028	1069.5	11	NA	NA	97500	7250	577000
91500 - 16	25.103	1.837	0.037	0.1788	0.0022	0.0099729	0.0753	0.0013	0.53106	0.0541	0.0028	1060.3	12	NA	NA	97000	7220	571000
91500 - 17	22.488	1.835	0.037	0.1781	0.0023	0.39257	0.0755	0.0012	0.28673	0.0512	0.0031	1056.4	13	NA	NA	92700	6870	541000
91500 - 18	25.103	1.827	0.039	0.1787	0.002	0.32942	0.0743	0.0012	0.14796	0.0556	0.003	1059.6	11	NA	NA	95600	6980	561000
91500 - 19	25.044	1.867	0.039	0.181	0.0023	0.29104	0.0752	0.0011	0.25826	0.0536	0.0027	1072.2	13	NA	NA	99920	7440	577000
91500 - 20	25.066	1.828	0.041	0.1792	0.002	0.41024	0.0741	0.0013	-6.8665e-06	0.0526	0.0026	1062.5	11	NA	NA	96700	7110	567000
91500 - 21	25.066	1.873	0.038	0.1802	0.0022	0.171	0.0758	0.0012	0.51183	0.0547	0.003	1067.9	12	NA	NA	96500	7210	567000
91500 - 22	25.045	1.871	0.038	0.1814	0.0022	0.38408	0.0749	0.0011	0.14438	0.0548	0.0029	1074.4	12	NA	NA	94000	7070	544000
91500 - 23	25.047	1.845	0.043	0.179	0.0022	0.89577	0.0743	0.0012	-0.066362	0.0541	0.0024	1061.7	12	NA	NA	97600	7200	570000
91500 - 24	25.062	1.877	0.038	0.17919	0.0019	0.47902	0.0759	0.0011	0.034315	0.0527	0.0027	1062.5	10	NA	NA	97800	7260	575000
91500 - 25	25.062	1.863	0.04	0.1798	0.0021	0.1797	0.0746	0.0013	0.24854	0.0537	0.0033	1066.1	12	NA	NA	95500	7100	559000
91500 - 26	25.07	1.852	0.044	0.179	0.0022	-0.094083	0.0748	0.0017	0.48187	0.0532	0.0023	1061.6	12	NA	NA	97700	7260	571000
91500 - 27	25.066	1.855	0.037	0.1802	0.002	0.09132	0.0747	0.0013	0.38394	0.0541	0.0025	1067.9	11	NA	NA	94200	6980	553000
91500 - 28	25.048	1.838	0.039	0.1795	0.002	0.23253	0.0743	0.0012	0.2468	0.0544	0.0027	1064.5	11	NA	NA	94300	6920	549000
91500 - 29	25.128	1.862	0.04	0.1794	0.0022	0.32582	0.0751	0.0012	0.16433	0.0547	0.0027	1063.6	12	NA	NA	95700	7120	560000
91500 - 30	24.284	1.904	0.042	0.1788	0.0023	0.4099	0.0757	0.0012	0.086733	0.0525	0.0021	1060.6	12	NA	NA	92400	7070	533000
91500 - 31	25.129	1.868	0.045	0.1796	0.0023	0.12763	0.0758	0.0017	0.33087	0.0557	0.0023	1064.8	12	NA	NA	91300	6780	531000
91500 - 32	25.129	1.855	0.044	0.18	0.0022	0.49172	0.0748	0.0013	-0.039986	0.0537	0.0028	1066.9	12	NA	NA	92200	6740	535000
91500 - 33	25.129	1.843	0.042	0.1785	0.0023	0.15747	0.0742	0.0015	0.31573	0.0529	0.0026	1058.8	12	NA	NA	86800	6420	509000
91500 - 34	25.058	1.836	0.037	0.1792	0.0021	0.012779	0.0744	0.0013	0.41311	0.0526	0.0024	1062.3	11	NA	NA	95700	7020	557000
91500 - 35	18.02	1.835	0.045	0.1799	0.0024	0.25826	0.0743	0.0015	0.22652	0.0554	0.0027	1066.5	13	NA	NA	89900	6550	511000
91500 - 36	25.058	1.859	0.048	0.1792	0.0023	0.32241	0.0754	0.0016	0.15135	0.0528	0.0024	1062.8	12	NA	NA	88300	6550	515000
91500 - 37	25.054	1.832	0.038	0.1793	0.0021	0.14517	0.0743	0.0013	0.31628	0.0525	0.003	1063.3	11	NA	NA	95600	7020	558000
91500 - 38	25.073	1.876	0.041	0.1792	0.0022	0.13557	0.0757	0.0014	0.41216	0.0541	0.0026	1062.4	12	NA	NA	93800	7000	547000
91500 - 39	25.117	1.827	0.046	0.1786	0.0021	0.10368	0.0739	0.0015	0.30071	0.0526	0.0031	1059.4	12	NA	NA	94800	6870	544000
91500 - 40	25.048	1.859	0.039	0.1793	0.0022	0.31695	0.07553	0.0011	0.21802	0.0547	0.0029	1062.9	12	NA	NA	95700	7130	560000
91500 - 41	16.961	1.869	0.042	0.1801	0.0021	0.22812	0.0748	0.0012	0.17764	0.0542	0.0029	1067.7	11	NA	NA	99780	7320	587000
91500 - 42	24.602	1.887	0.04	0.1797	0.0023	0.30227	0.07574	0.001	0.33326	0.0564	0.0028	1065.1	12	NA	NA	96800	7310	561000
91500 - 43	25.056	1.854	0.038	0.1792	0.002	0.20343	0.0752	0.0011	0.29913	0.0549	0.0027	1062.5	11	NA	NA	86800	6430	506000
91500 - 44	25.09	1.831	0.039	0.1792	0.0021	0.17824	0.0744	0.0013	0.25621	0.0546	0.0023	1062.3	11	NA	NA	87900	6500	508000
91500 - 45	25.126	1.857	0.041	0.1803	0.0024	0.72668	0.0744	0.0013	-0.07655	0.0557	0.0028	1068.3	13	NA	NA	89400	6590	517000
91500 - 46	16.388	1.864	0.049	0.1812	0.0024	0.35804	0.0743	0.0014	0.15046	0.0544	0.003	1073.5	13	NA	NA	93200	6820	554000
91500 - 47	25.076	1.854	0.04	0.1779	0.0022	0.1744	0.0751	0.0014	0.35193	0.0553	0.0028	1055.5	12	NA	NA	88900	6610	517000
91500 - 48	25.076	1.849	0.044	0.179	0.0022	0.568	0.075	0.0013	-0.11111	0.0533	0.0025	1061.7	12	NA	NA	88100	6500	509000
91500 - 49	25.114	1.836	0.041	0.1793	0.0024	0.44783	0.0743	0.0012	0.091839	0.0504	0.0027	1063.1	13	NA	NA	91000	6680	528000
91500 - 50	25.049	1.859	0.041	0.1804	0.002	0.26027	0.0744	0.0012	0.23269	0.0528	0.0026	1069.2	11	NA	NA	89000	6610	513000
91500 - 51	25.061	1.829	0.041	0.1775	0.0021	0.1796	0.0744	0.0014	0.25564	0.0534	0.0028	1053.2	11	NA	NA	89700	6680	522000
91500 - 52	25.078	1.865	0.044	0.1808	0.0022	0.3029	0.0749	0.0013	0.14691	0.0515	0.0026	1071.3	12	NA	NA	88700	6510	507000
91500 - 53	25.08	1.862	0.044	0.1798	0.0022	0.40066	0.0754	0.0014	0.059721	0.0564	0.0031	1065.6	12	NA	NA	86500	6390	498000
91500 - 54	25.109	1.899	0.041	0.1798	0.0021	0.20745	0.0767	0.0015	0.24275	0.0547	0.0029	1066	11	NA	NA	89200	6600	515000
91500 - 55	25.076	1.861	0.04	0.1784	0.002	0.0014676	0.0759	0.0013	0.37969	0.056	0.0032	1058.3	11	NA	NA	88000	6540	506000
91500 - 56	25.079	1.875	0.037	0.1807	0.0021	0.23473	0.07474	0.001	0.36022	0.054	0.0032	1070.5	11	NA	NA	88700	6580	507000
91500 - 57	25.088	1.84	0.04	0.1786	0.0022	0.29815	0.0754	0.0012	0.18228	0.0543	0.0022	1059.4	12	NA	NA	89200	6600	516000
91500 - 58	24.931	1.835	0.039	0.1788	0.0021	0.1797	0.0753	0.0012	0.29202	0.0515	0.0026	1060.4	11	NA	NA	88700	6530	517000
91500 - 59	14.623	1.856	0.049	0.1804	0.0026	0.33215	0.0746	0.0016	0.16892	0.0532	0.0037	1069	14	NA	NA	98700	7310	593000
91500 - 60	24.931	1.83	0.043	0.1791	0.0021	0.33945	0.0748	0.0015	0.075614	0.0515	0.0027	1062	12	NA	NA	88900	6460	512000
aTh disequilibrium corrected for a Th/U = 2 of the melt

## Sheet: LA-ICP-MS TE
Zircon ID	spot location	Sample	CA-ID-TIMS ID	Al	P	Ti	Sr	Y	Zr	Nb	Ba	La	Ce	Pr	Nd	Sm	Eu	Gd	Tb	Dy	Ho	Er	Tm	Yb	Lu	Hf	Th	U
				in ppm	in ppm	in ppm	in ppm	in ppm	in ppm	in ppm	in ppm	in ppm	in ppm	in ppm	in ppm	in ppm	in ppm	in ppm	in ppm	in ppm	in ppm	in ppm	in ppm	in ppm	in ppm	in ppm	in ppm	in ppm
Old Tonalite
BHX_1b_01 - 1	core	Old Tonalite	1_z1	-	237	5.03	0.218	585	493200	0.1	0.04	-	3.8	0.0294	0.62	1.39	0.74	8.6	3.14	43.5	18.7	94	23.6	256	59.8	9160	10.7	22.5
BHX_1b_01 - 2	rim	Old Tonalite	1_z1	-	131	3.69	0.227	248	516000	0.12	-	-	2.79	-	0.23	0.42	0.194	3.41	1.41	17.96	7.95	40.3	10.41	117.2	26.62	10730	8.68	21.08
BHX_1b_02 - 1	core	Old Tonalite	1_z2	-	110.3	3.4	-	340	495000	0.075	-	-	2.38	0.0132	0.43	1.17	0.53	5.78	1.97	25.6	10.4	51.4	12.7	138	31.5	10240	5.01	12.15
BHX_1b_02 - 2	rim	Old Tonalite	1_z2	-	197	5.26	0.242	642	490000	0.097	-	-	4.82	0.0164	0.42	1	0.549	7.84	3.21	44.8	20.3	104.2	25.4	281	66.3	9950	17.5	37.2
BHX_1b_03 - 1	core	Old Tonalite	1_z03	-	134	6.37	0.201	598	489700	0.089	-	-	4.27	0.057	1.46	2.73	1.13	12.43	3.98	47.5	19.24	92.7	22.94	244.1	54.2	9150	15.05	24.13
BHX_1b_03 - 2	rim	Old Tonalite	1_z03	-	137	5.7	-	424	513000	0.11	-	-	4.13	0.016	0.5	1.04	0.475	6.24	2.277	28.94	12.76	70.6	19.1	218	53.4	9870	10.44	26.8
BHX_1b_04 - 1	core	Old Tonalite	1_z4	-	205	6.39	0.186	569	492300	0.11	-	-	4.81	0.042	0.662	1.49	0.692	8.75	3.18	41.1	17.68	94.8	24.3	261	61.3	8830	10.81	20.6
BHX_1b_04 - 2	rim	Old Tonalite	1_z4	-	135	5.52	-	458.6	492900	0.13	-	-	4.27	0.0238	0.462	1.17	0.523	6.35	2.365	31.4	14.01	75.5	20.76	238.7	57.8	9320	8.22	20.17
BHX_1b_05 - 1	core	Old Tonalite	1_z5	-	101	5.11	0.146	291	509000	0.073	-	-	3.65	0.0105	0.272	0.68	0.29	4.16	1.498	19.3	8.77	47.8	12.5	141.1	33.9	9990	9.94	19.73
BHX_1b_05 - 2	rim	Old Tonalite	1_z5	-	82.2	3.53	-	287	495400	0.082	-	-	2.97	0.0214	0.416	0.78	0.402	4.66	1.7	21.1	8.78	45.3	11.75	133.1	32.6	11050	11.3	21.8
BHX_1b_06 - 1	core	Old Tonalite	1_z6	-	286	9.2	0.26	1278	499000	0.13	-	-	7.54	0.052	1.19	2.7	1.33	17.2	6.73	93.9	41.4	207.6	49.96	522.9	117	8460	25.7	47.61
BHX_1b_06 - 2	rim	Old Tonalite	1_z6	-	160	5.12	-	511	495000	0.11	-	0.0087	3.9	0.0264	0.291	1.01	0.429	6.29	2.4	34.7	15.67	82.8	21.2	236	56.6	9800	11.69	33.6
BHX_1b_07 - 1	core	Old Tonalite		-	141	5.67	-	461	483100	0.12	-	0.0134	3.88	0.023	0.41	1.14	0.5	6.53	2.41	30.6	14.07	74.8	19.99	229.8	55.7	9490	10.63	25.5
BHX_1b_07 - 2	rim	Old Tonalite		-	116	4.37	0.129	337.4	499600	0.087	-	-	3.3	0.0123	0.312	0.81	0.369	5.15	1.872	23.45	10.58	55.35	14.64	168.9	41.85	10310	9.84	21.18
BHX_1b_08 - 1	core	Old Tonalite	1_z8	-	105	6.31	0.185	720	515000	0.11	-	-	5.55	0.091	2.2	3.33	1.305	15.09	4.87	57.2	23	111.7	27.26	287.5	64.5	9800	24.97	32.4
BHX_1b_08 - 2	rim	Old Tonalite	1_z8	-	136	4.15	-	232.2	490100	0.077	-	-	2.23	0.0079	0.134	0.534	0.249	3.13	1.189	16.16	7.33	38	9.65	109.1	26.3	9990	6.86	18.38
BHX_1b_09 - 1	core	Old Tonalite		-	213	6.33	-	707	501400	0.12	-	-	4.67	-	0.49	1.32	0.637	8.79	3.43	47.9	21.99	117.7	29.54	326.7	77.2	9610	13.24	34.2
BHX_1b_09 - 2	rim	Old Tonalite		-	188	3.99	0.293	592	487400	0.09	-	0.0105	3.78	0.0356	1	1.98	0.907	11	3.8	47.3	19.2	94.4	22.92	242.3	57.2	10180	13.61	27.1
BHX_1b_10 - 1	core	Old Tonalite		-	96	3.39	0.176	180.1	506000	0.1	-	-	2.85	-	0.079	0.308	0.123	2.22	0.888	12.46	5.48	29.29	7.74	88.4	21.77	11290	9.52	23.69
BHX_1b_10 - 2	rim	Old Tonalite		-	197	3.94	0.165	601	486000	0.15	0.066	-	4.16	0.0039	0.32	1.13	0.549	6.96	2.81	40.7	19.14	100.6	25.3	276	67.2	9450	10.99	28.3
BHX_1b_11 - 1	core	Old Tonalite	1_z11	-	233	7.54	0.239	1009	486700	0.088	-	-	6.09	0.0314	0.589	1.61	0.836	11.89	5.15	70.3	32.39	165.3	40.9	433	101.5	8610	21.08	42.8
BHX_1b_11 - 2	rim	Old Tonalite	1_z11	-	138	3.37	-	299.9	482500	0.086	-	-	3.34	0.0149	0.188	0.456	0.249	3.89	1.57	21.43	9.44	49.2	12.2	133.8	31.79	10210	11.75	27.44
BHX_1b_12 - 1	core	Old Tonalite	1_z12.2	12.7	232	3.92	0.214	429	493000	0.076	-	-	2.23	-	0.286	0.92	0.451	6.3	2.33	30.7	13.19	70.8	18.26	207	49.6	8970	5.37	15.29
BHX_1b_12 - 2	rim1	Old Tonalite	1_z12.2	-	245	7.13	0.172	857	486500	0.13	-	-	4.94	0.0217	0.45	1.15	0.8	10	4.04	56.5	26.79	142.9	36.27	396	93.9	8920	14.28	37.61
BHX_1b_13 - 1	core	Old Tonalite	1_z13	-	206	4.41	0.168	396.1	484000	0.077	-	-	2.3	0.0133	0.288	0.72	0.403	5.63	2.1	28.42	12.86	66.4	16.97	187.3	44.8	8840	5.14	13.9
BHX_1b_13 - 2	rim1	Old Tonalite	1_z13	-	209	5.64	-	544.3	492700	0.08	-	-	3.25	0.0153	0.436	0.93	0.523	7.04	2.637	36.28	16.94	90.7	23.43	260.2	62.3	8870	7.51	21.68
BHX_1b_13 - 3	rim2	Old Tonalite	1_z13	-	154	4.85	-	451.8	486000	0.089	-	-	3.08	-	0.235	0.95	0.404	5.9	2.224	31.43	14.2	76.2	19.49	212.9	51.03	8910	6.63	17.69
BHX_1b_13 - 4	rim3	Old Tonalite	1_z13	-	225	4.5	0.38	1039	532000	0.34	-	-	8.7	0.0116	0.54	1.49	0.77	12.05	4.99	73.4	32.83	174.1	43.3	467	104.4	11150	25.5	62.6
BHX_1b_14 - 1	core	Old Tonalite	1_z14	-	170	6.92	0.216	492	491000	0.092	-	-	4.66	0.0297	0.529	1.19	0.58	6.38	2.43	31.28	14.72	81.7	21.78	246.7	60.6	8780	11.96	27.66
BHX_1b_14 - 2	rim	Old Tonalite	1_z14	-	96.1	2.68	-	251	488900	0.083	-	-	2.94	-	0.204	0.5	0.227	2.87	1.263	17	7.46	39.6	10.4	123.9	31.2	12040	11.29	29.21
BHX_1b_15 - 1	core	Old Tonalite		-	305	5.5	0.28	840	523000	0.32	-	0.011	5.57	0.025	0.5	1.34	0.67	12.1	4.71	61.2	26.3	133	33.3	355	80	9710	22.4	39.8
BHX_1b_16 - 1	core	Old Tonalite	1_16	-	191	5.39	0.241	583	486000	0.1	0.027	-	3.49	0.0246	0.394	1.24	0.624	7.44	2.87	40.7	18.5	94.9	23.8	260	61.4	8920	10.3	22.4
BHX_1b_16 - 2	rim	Old Tonalite	1_16	-	193	4.57	0.155	437	487100	0.12	-	-	4.73	0.0172	0.253	0.89	0.43	6.28	2.575	34.02	14.09	70.6	16.69	176.9	40.89	10020	26.17	41.95
BHX_1b_17 - 1	core	Old Tonalite	1_z12	-	273	6.56	0.21	1218	477700	0.091	-	-	8.12	0.122	2.49	5.18	1.805	28.16	9.19	108.6	42.01	193.7	43.68	426.4	89.7	8580	24.45	31.51
BHX_1b_17 - 2	rim1	Old Tonalite	1_z12	-	130	5.58	0.152	757	488000	0.097	-	-	5.34	0.072	1.39	3.32	1.2	16.32	5.34	62.4	25.04	118.7	27.94	284	61.67	9500	16.41	22.36
BHX_1b_17 - 3	rim2	Old Tonalite	1_z12	-	131	3.89	0.195	314.6	482900	0.08	-	-	3.34	0.0107	0.221	0.85	0.314	4.54	1.704	22.29	9.8	52.7	13.69	156.4	37.6	10580	7.85	19.08
BHX_1b_18 - 1	core	Old Tonalite		7.4	266	7.21	0.24	895	489000	0.11	-	-	5.25	0.0327	0.56	1.3	0.74	10.64	4.31	60.7	28.1	148.9	36.2	396	93.5	8730	17.1	38.8
BHX_1b_18 - 2	rim	Old Tonalite		-	177	4.76	0.187	627.6	485000	0.11	-	-	4.65	0.0251	0.33	1.23	0.581	8.04	3.19	43.9	19.77	102.9	25.63	283	67.1	9650	13.24	32.79
BHX_1b_19 - 1	core	Old Tonalite		7.4	254	6.93	0.213	677	483000	0.074	-	0.0224	3.67	0.027	0.514	1.31	0.732	9.18	3.35	47.2	21.32	111.9	28.4	313.3	76.2	8550	14.75	29.49
BHX_1b_19 - 2	rim1	Old Tonalite		-	179	5.38	-	550	485000	0.075	-	-	3.66	0.012	0.311	0.94	0.574	7.44	2.68	37.86	17.39	91.1	23.34	250.6	60.2	8930	9.65	22.37
BHX_1b_19 - 3	rim2	Old Tonalite		-	138	3.93	0.118	425	482800	0.084	-	-	3.17	0.0147	0.288	0.76	0.35	5.17	2.105	28.79	13.12	70.1	17.59	195	46.4	9870	7.12	19.81
BHX_1b_20 - 1	core	Old Tonalite	1_z20	7.4	188	3.55	0.153	356.2	489000	0.069	-	-	2.16	0.0134	0.183	0.72	0.352	4.42	1.875	24.39	10.91	58.6	14.93	169.7	41.58	9610	5.23	14.69
BHX_1b_20 - 2	rim	Old Tonalite	1_z20	-	173	4.35	0.205	506.9	480700	0.096	-	-	3.13	-	0.296	0.92	0.526	6.64	2.321	32.89	15.6	86.3	22.5	248.7	61.6	9030	6.95	21.43
BHX_1b_21 - 1	core	Old Tonalite	1_z21	-	121	6.14	-	622	494000	0.095	-	-	4.91	0.102	1.82	3.15	1.167	13.02	4.13	48.3	20.08	96.4	23.49	251.6	57.3	9690	24.43	32.6
BHX_1b_21 - 2	rim1	Old Tonalite	1_z21	-	147	3.23	0.134	681.6	487000	0.076	-	-	4.28	0.053	1.14	2.54	1.084	14.25	4.68	56.8	22.9	106.9	25.15	262.9	57.96	10020	15.97	27.65
BHX_1b_22 - 1	core	Old Tonalite		-	607	6.88	0.46	890	456100	0.12	-	0.042	6.33	0.034	0.64	1.76	0.8	11.86	4.75	62	28.2	146.2	35.5	376	86.9	8170	21	35.2
BHX_1s_1 - 1	core	Old Tonalite		-	127.8	4.17	0.177	253.6	488200	0.084	0.018	0.0035	2.44	0.0035	0.182	0.564	0.3	3.56	1.346	17.7	8.27	42.6	11.02	125.4	29.39	9810	5.77	15.75
BHX_1s_1 - 2	rim	Old Tonalite		-	111.8	2.85	0.253	422	473000	0.059	-	-	3.44	0.0266	0.554	1.62	0.595	7.55	2.587	32.4	13.33	66.3	16.93	185	43.5	11140	12.75	24.1
BHX_1s_10 - 1	core	Old Tonalite		-	129.2	5.39	-	374.1	486800	0.091	-	-	2.52	0.0132	0.4	0.98	0.573	6.3	2.166	28.07	11.92	61	15.45	170.9	39.74	8840	5.27	13.1
BHX_1s_10 - 2	rim	Old Tonalite		-	191	3.79	0.158	397.2	474000	0.073	-	-	2.7	0.015	0.285	0.78	0.388	5.56	2.07	28.39	12.52	65.9	16.72	185.3	43.8	9640	6.72	17.75
BHX_1s_11 - 1	core	Old Tonalite		-	156	3.95	0.117	448.3	482000	0.096	-	-	3.52	0.0124	0.33	0.82	0.493	6.28	2.4	32.4	14.62	75.2	18.8	208.3	48.9	9680	8.8	23.29
BHX_1s_11 - 2	rim	Old Tonalite		-	214	5.71	0.166	772	486000	0.12	-	-	5.35	0.0247	0.441	1.4	0.649	9.84	4.04	56.1	25.1	128.8	32.5	352	81.4	9570	19	45.4
BHX_1s_12 - 1	core	Old Tonalite		-	179	3.32	0.169	440	482000	0.11	-	-	3.07	0.0187	0.46	0.99	0.468	6.92	2.41	32.4	14.29	71.2	18.12	197.6	46.9	9990	8.83	21.33
BHX_1s_12 - 2	rim	Old Tonalite		-	244	5.27	0.299	933	480300	0.11	-	-	7.34	0.0291	0.535	1.53	0.676	11.01	4.54	64.6	29.55	154.6	38.38	413.6	94.9	9780	25.64	61.5
BHX_1s_13 - 1	core	Old Tonalite		-	190	6.8	0.292	1026	486200	0.092	-	0.0165	7.21	0.114	2.2	3.74	1.434	20.43	6.9	82.7	33.58	162.6	39.38	403.1	88.7	9500	35.7	48.7
BHX_1s_13 - 2	rim	Old Tonalite		-	130.5	3.84	0.173	328.7	475800	0.082	-	-	3.46	0.0059	0.221	0.7	0.299	4.75	1.758	23.17	10.14	52.5	13.97	158.7	38.57	10700	9.95	21.9
BHX_1s_14 - 1	core	Old Tonalite		-	248	6.48	0.32	2067	498000	0.093	-	0.024	12.45	0.219	4.36	8.81	3.58	41.3	13.47	158.5	61.9	285.1	65.7	662	136.5	9200	46.9	54.1
BHX_1s_14 - 2	rim	Old Tonalite		-	328	8.14	0.414	2799	495000	0.12	0.025	0.0199	17.46	0.255	5.02	10.37	4.41	55.5	18.12	212.9	83	382.8	88.3	876	180.8	8890	72.8	75.8
BHX_1s_15 - 1	core	Old Tonalite		-	282	10.8	0.346	1174	492000	0.13	-	-	9.48	0.0397	0.9	1.99	0.995	12.72	4.98	74.4	36.6	201	51.6	559	128.1	8560	30	62.2
BHX_1s_15 - 2	rim	Old Tonalite		-	198.3	5.41	-	630	490600	0.12	-	0.0034	8.2	0.0174	0.309	1.15	0.476	9.02	3.52	47.8	20.3	103.1	25.1	273	61.5	10380	30.2	44.5
BHX_1s_16 - 1	core	Old Tonalite		5	251	5.82	0.327	893	489600	0.092	-	-	5.27	0.036	1	2.2	1.034	13.04	5.11	68.2	29.38	149.6	37	397	90.9	9100	18.47	36.8
BHX_1s_16 - 2	rim	Old Tonalite		-	201	5.6	0.272	628	500000	0.11	0.036	-	4.46	0.0107	0.437	1.02	0.611	7.64	3.17	43.6	19.9	104.3	26.44	294.1	67.9	9310	13.98	32.12
BHX_1s_17 - 2	rim	Old Tonalite		-	189	5.49	0.144	678	498000	0.1	-	0.0058	5.11	0.0173	0.397	1.18	0.541	8.84	3.43	48.56	21.82	111.8	28.4	305.7	70.33	9930	17.72	40.43
BHX_1s_18 - 1	core	Old Tonalite		-	294	8.46	0.305	1155	481100	0.12	-	-	10.78	0.061	1.07	2.56	0.97	15.8	5.89	79	35.4	184.7	46.7	491	112.2	8520	30.3	51.9
BHX_1s_19 - 1	core	Old Tonalite		-	147.6	3.75	0.147	701	476000	0.086	-	-	4.6	0.042	1.24	2.64	1.069	13.76	4.78	57.9	23.46	112	27.26	281.9	63.6	9770	16.35	30.52
BHX_1s_19 - 2	rim1	Old Tonalite		-	224	5.43	0.247	782	487400	0.11	-	-	6.28	0.0216	0.482	1.56	0.594	10.52	4.03	56.2	24.73	128.2	32.66	349	79.8	9620	28.6	57.4
BHX_1s_19 - 3	rim2	Old Tonalite		-	195	5.27	0.24	628	489000	0.14	-	-	5.44	0.0175	0.439	1.04	0.455	8.19	3.21	44.6	20	102	25.3	273	62.6	10040	21	46.5
BHX_1s_2 - 1	core	Old Tonalite		-	287	6.31	0.357	1321	497000	0.18	0.14	0.0086	9.8	0.03	0.83	2.01	1.008	15.81	6.75	93.9	41.9	211.8	53.2	576	125.4	10380	34.8	75.3
BHX_1s_2 - 2	rim	Old Tonalite		-	161.8	3.87	0.163	386	476000	0.078	-	0.0052	3.4	0.0078	0.238	0.712	0.354	5.08	1.955	27.4	12.41	64.7	16.47	179.7	41.8	10080	10.4	26.82
BHX_1s_20 - 1	core	Old Tonalite		-	237	4.76	0.161	636	483700	0.068	-	-	3.6	0.045	0.87	1.88	0.98	11.4	3.98	49.7	21	104.1	26.1	276	63.4	8970	11.8	23.7
BHX_1s_20 - 2	rim1	Old Tonalite		-	169	4.25	0.187	471	491000	0.079	-	-	3.28	0.0125	0.341	0.828	0.436	6.02	2.41	32.7	14.75	78.1	20.05	225	53.4	9660	7.7	22.11
BHX_1s_20 - 3	rim2	Old Tonalite		-	152	4.05	0.155	450.4	482000	0.071	-	-	3.61	0.0083	0.326	0.834	0.4	5.86	2.257	30.65	13.77	73.7	18.58	206.6	49.77	9930	9.03	23.63
BHX_1s_21 - 1	core	Old Tonalite		-	138	6.29	0.156	424.9	494000	0.1	-	-	4.41	0.0125	0.43	1	0.504	6.45	2.211	29.59	12.99	69.3	18.83	213.6	51.35	9130	9.88	22.85
BHX_1s_21 - 2	rim	Old Tonalite		-	226	4.51	0.275	773	491000	0.1	0.027	-	6.17	0.015	0.385	1.19	0.627	9.32	3.65	51.7	24.2	129.8	33.5	375	86.3	10020	17.03	49.6
BHX_1s_22 - 1	core	Old Tonalite		-	226	6.41	0.276	878	483700	0.13	-	-	5.31	0.055	0.98	2.39	1.056	14.18	5.09	68.3	28.7	146	36.2	371	83.9	8620	17.7	33.8
BHX_1s_22 - 2	rim	Old Tonalite		-	161	5.7	0.14	537	538000	0.18	-	-	3.42	0.0061	0.37	1.21	0.633	7.16	2.68	38.1	17.08	89.8	24	273	61.7	9540	8.38	23.64
BHX_1s_23 - 1	core	Old Tonalite		-	244	4.71	0.231	1250	486500	0.13	-	0.0068	8.7	0.116	2.23	4.89	1.85	25.6	8.47	103	40	188	45	459	100.3	9570	40.9	63.2
BHX_1s_23 - 2	rim	Old Tonalite		28.9	422	7.3	0.61	1217	495100	0.19	0.19	0.037	9.39	0.046	0.73	2.13	0.917	14.56	6.15	88.9	39.41	206.9	51.7	555	126.7	10290	41.24	85.8
BHX_1s_24 - 1	core	Old Tonalite		-	289	6.57	0.261	1180	492000	0.12	0.026	0.0053	7.54	0.041	1.15	2.46	1.36	17.8	6.6	86.1	37.1	183	44.8	476	103.6	8700	27.7	47.3
BHX_1s_24 - 2	rim	Old Tonalite		-	148	4.43	0.182	427	505000	0.083	-	-	3.11	0.0176	0.327	0.853	0.392	5.66	2.18	29.5	13.22	71.2	18.49	210	48.9	9780	7.21	20.34
BHX_1s_25 - 1	core	Old Tonalite		-	162	4.73	0.216	386.1	504000	0.095	-	-	2.39	0.0113	0.235	0.73	0.412	4.99	1.93	27	12.33	64.7	16.52	188.4	44.13	8980	5.01	14.55
BHX_1s_26 - 1	core	Old Tonalite		-	342	8.83	0.327	1521	496000	0.17	-	-	9.44	0.042	0.91	2.38	1.401	20.2	8.24	112.3	48.4	238.6	58.1	609	136.5	8860	39.2	67.2
BHX_1s_26 - 2	rim	Old Tonalite		-	197	5.42	0.199	678	517000	0.1	-	0.0042	5	0.0179	0.427	1.08	0.572	9.51	3.57	49.5	21.46	111.5	28.2	313	72.1	9810	15.33	39.7
BHX_1s_27 - 1	core	Old Tonalite		-	269	5.74	0.264	1090	501000	0.12	-	0.004	8.71	0.0329	0.66	2.25	1.04	15.9	6.36	83.1	36	178.7	43.1	453	101.4	9930	37.1	59.9
BHX_1s_28 - 1	core	Old Tonalite		-	181	4.91	0.148	430.3	512700	0.09	-	0.0067	3.45	0.0176	0.319	0.88	0.422	5.74	2.321	30.8	13.46	70.3	18.22	199.8	46.56	10190	8.22	21.24
BHX_1s_28 - 2	rim	Old Tonalite		41.2	144	3.95	0.258	461	526000	0.12	0.051	0.0101	3.42	0.0101	0.23	0.88	0.393	5.86	2.272	31	14.21	76.1	19.65	221.6	54.2	11150	16.49	27.52
BHX_1s_29 - 1	core	Old Tonalite		-	253	5.62	0.207	966	501800	0.14	-	-	6.76	0.0166	0.542	1.8	0.813	11.77	4.82	69.9	30.95	160	40.37	435.1	99.7	9680	21.72	51.96
BHX_1s_29 - 2	rim	Old Tonalite		-	168.3	4.71	0.207	486	501800	0.083	-	0.0046	3.93	0.0106	0.251	1.04	0.503	6.24	2.44	33.6	15.5	78.2	20.3	219	50.6	10110	14.48	33.8
BHX_1s_3 - 1	core	Old Tonalite		-	305	8.3	0.309	1291	484000	0.11	0.022	0.0051	7.57	0.071	1.56	3.01	1.642	21.32	7.76	100.8	42.41	209.2	50.84	532	119.5	8690	31.4	51.1
BHX_1s_3 - 2	rim1	Old Tonalite		-	163	5.09	0.141	380.9	469400	0.076	-	-	2.93	0.0129	0.242	0.66	0.4	5.11	1.931	26.49	11.87	63.2	15.98	178.3	41.4	9240	8.12	19.23
BHX_1s_3 - 3	rim2	Old Tonalite		-	142	3.25	0.176	349	475700	0.085	0.016	-	2.91	0.0086	0.247	0.62	0.288	4.51	1.8	25.2	11.1	57.5	14.5	157	37.7	10370	7.6	20.7
BHX_1s_30 - 1	core	Old Tonalite		-	147	5.08	0.24	473	540000	0.15	-	0.0174	3.91	-	0.286	1.01	0.469	6.44	2.476	34.4	15.03	79	20.14	223.2	50.7	10780	11.33	24
BHX_1s_30 - 2	rim	Old Tonalite		-	166	3.84	0.28	714	563000	0.52	-	-	5.12	-	0.51	1.64	0.447	8.92	3.73	51.9	22.9	118	30.8	339	75.6	10840	15	37.7
BHX_1s_32 - 1	core	Old Tonalite		-	194	6.12	0.281	844	508000	0.1	-	-	5.29	0.072	1.21	2.6	1.23	14.8	5.2	67.2	27.5	134.8	33.2	350	77.1	9120	18.5	31.9
BHX_1s_32 - 2	rim	Old Tonalite		-	235	6.79	0.208	967	508000	0.11	-	0.0103	6.61	0.0268	0.48	1.56	0.756	11.34	4.77	67.8	31	155.7	39.2	422	94.3	9140	22.7	44.5
BHX_1s_33 - 1	core	Old Tonalite		-	209	4.99	0.303	1060	511000	0.13	-	0.0078	6.67	0.088	1.99	3.97	1.78	22.2	7.27	87.5	35	163	39.3	402	86.3	9660	26.1	40.5
BHX_1s_33 - 2	rim1	Old Tonalite		-	139	4.18	0.15	748	501000	0.093	0.079	0.0194	4.56	0.07	1.28	3.09	1.29	15.89	5.24	63.2	24.28	113.4	27.04	278.6	61.1	10070	17.63	29.4
BHX_1s_33 - 3	rim2	Old Tonalite		-	253	5.8	0.159	958	499700	0.087	-	-	7.06	0.0218	0.55	1.63	0.81	11.64	4.9	69.5	30.74	159.2	39.74	427.4	97.8	9770	24.04	54.92
BHX_1s_34 - 1	core	Old Tonalite		-	262	5.53	0.225	790	513000	0.097	-	-	4.62	0.039	0.82	2.15	1.1	12.4	4.53	61.2	25.3	129.1	32	351	77.8	8940	16.35	31.3
BHX_1s_34 - 2	rim1	Old Tonalite		-	213	5.21	0.184	577	515000	0.14	-	0.038	4.12	0.036	0.423	1.16	0.512	7.03	2.79	39.3	17.56	92.4	23.5	263	61.9	9820	11.71	32.5
BHX_1s_34 - 3	rim2	Old Tonalite		-	200.3	6.11	0.144	645	501600	0.089	-	0.0112	4.23	0.0198	0.498	1.13	0.607	7.73	3.01	44.5	20.02	107.2	27.02	299.1	70.3	9180	13.71	33.46
BHX_1s_35 - 1	core	Old Tonalite		-	172	5.91	0.222	745	502000	0.079	-	0.0066	5.77	0.088	1.75	3.32	1.28	15.4	5.19	62.7	24.9	116.5	28.5	296	65.5	9080	18.6	25
BHX_1s_35 - 2	rim	Old Tonalite		-	206	8.71	0.342	1282	513000	0.17	0.033	-	11.73	0.064	1.33	2.86	1.23	18.3	6.91	92	40	200.9	49	519	114.7	9690	46.2	56.2
BHX_1s_36 - 1	core	Old Tonalite		6	432	7.46	0.388	2490	517000	0.12	0.036	0.0196	15.65	0.198	4.24	8.78	4.42	49.7	15.99	187.8	71.8	336	77.7	800	169.8	8750	83	90.8
BHX_1s_36 - 2	rim	Old Tonalite		-	124	4.67	-	393	509000	0.12	-	-	2.76	-	0.219	0.679	0.434	5.2	1.985	27.04	12.27	66.4	17.17	193.4	46.9	9680	5.81	17.76
BHX_1s_37 - 1	core	Old Tonalite		15	217	5.5	0.187	541	500000	0.088	0.034	-	3.23	0.0224	0.58	1	0.638	7.99	2.83	39	16.79	88.1	22.03	242.2	56.6	9000	9.15	20.24
BHX_1s_38 - 1	core	Old Tonalite		7.1	184	5.82	0.217	826	505700	0.079	-	0.0064	5.28	0.086	1.29	2.58	1.23	15.16	5.28	65.7	26.98	134.5	32.19	346.5	77	9280	18.54	31.07
BHX_1s_38 - 2	rim	Old Tonalite		-	139	4.03	0.174	397.3	513000	0.093	-	-	3.58	0.0083	0.197	0.69	0.365	4.98	2.032	28.13	12.44	67.2	17.27	192.4	45.06	10590	9.13	23.99
BHX_1s_39 - 1	core	Old Tonalite		-	166	4.15	0.25	680	545000	0.11	-	-	4.54	0.048	0.84	2.07	0.9	11.2	4.2	52	22.7	113	27.9	303	65.9	10860	14.4	30.2
BHX_1s_39 - 2	rim	Old Tonalite		-	167	5.16	0.207	549	504000	0.12	-	-	4.44	0.006	0.317	1	0.523	7.88	2.83	39.5	17.2	88.4	22.3	241	54.3	9980	17.1	36.7
BHX_1s_4 - 2	rim	Old Tonalite		-	159.5	3.93	0.15	437.8	476600	0.078	-	-	2.96	0.0166	0.355	0.82	0.459	5.9	2.352	30.54	13.66	74	19.03	219.7	52.7	9660	6.74	20.05
BHX_1s_40 - 1	core	Old Tonalite		-	164	4.8	0.217	497	501900	0.13	-	-	3.22	0.015	0.31	1.07	0.42	5.71	2.33	33.86	15.37	82.3	20.85	236.1	57.1	9170	8.4	22.29
BHX_1s_40 - 2	rim	Old Tonalite		7.1	187	5.07	0.181	514	511800	0.11	-	0.0059	3.09	0.0133	0.361	0.89	0.497	6.89	2.66	36.1	15.98	84.4	21.87	240.7	56.8	9400	8.54	22.5
BHX_1s_41 - 1	core	Old Tonalite		-	339	9.31	0.325	1729	508000	0.19	-	0.0056	11.13	0.041	0.98	2.53	1.499	21.9	8.79	120.6	52	261.5	63.5	670	148.4	8930	45.5	75.8
BHX_1s_42 - 1	core	Old Tonalite		-	206	4.49	0.249	792	511000	0.14	-	-	5.67	0.0201	0.403	1.33	0.72	10.56	4.1	55.3	24.8	129	32.7	352	81	9940	16.7	39.4
BHX_1s_42 - 2	rim	Old Tonalite		-	224	5.26	0.276	840	513000	0.089	-	-	6.2	0.0146	0.503	1.44	0.673	10.21	4.16	58.2	26.17	138	34.63	385	88.2	10150	17.03	47.1
BHX_1s_43 - 1	core	Old Tonalite		-	204	6.71	0.181	696	510000	0.1	-	-	4.07	0.0211	0.479	1.49	0.728	9.18	3.43	48.8	21.9	113.2	28.7	314	71.3	9150	12.46	28.3
BHX_1s_43 - 2	rim	Old Tonalite		-	206	5.53	0.26	791	518000	0.11	-	-	5.5	0.0234	0.427	1.41	0.686	9.07	3.86	52.9	24.92	132.2	34.1	382	88.6	10090	14.04	41.7
BHX_1s_46 - 1	core	Old Tonalite		-	217	4.01	0.236	647	508000	0.099	-	-	4.02	0.0272	0.83	1.99	0.816	11.74	4.1	51.4	21.28	105.6	25.86	274.9	63.3	10200	13.82	28.69
BHX_1s_46 - 2	rim	Old Tonalite		-	182	5.02	0.254	608	510000	0.12	-	-	4.49	0.0234	0.34	1.09	0.491	7.67	3.05	43.3	18.87	100.4	24.9	285	65.4	9840	14.87	36.6
BHX_1s_47 - 1	core	Old Tonalite		-	223	5.56	0.209	1078	509000	0.099	-	0.0124	6.48	0.112	2.13	4.1	1.86	22.5	7.34	90.2	35.55	165.6	40.23	408.2	89.2	9270	24.33	37.64
BHX_1s_47 - 2	rim	Old Tonalite		-	99.5	4.27	-	197.1	515000	0.079	-	0.008	2.33	-	0.147	0.376	0.165	2.68	1.006	14.21	6.04	32.6	8.23	92.1	21.81	10510	5.68	14.89
BHX_1s_48 - 1	core	Old Tonalite		7.3	308	5.31	0.205	782	518000	0.094	-	-	4.78	0.04	0.68	2	0.88	11.82	4.48	58.6	24.72	126.9	31.97	345.5	77.5	9530	12.91	26.94
BHX_1s_48 - 2	rim	Old Tonalite		-	321	8.17	0.276	1377	517000	0.14	-	0.0044	9.91	0.0353	0.78	2.54	1.072	16.12	6.33	89.5	41.4	220.1	55.4	604	131.7	9650	25.54	54.5
BHX_1s_49 - 1	core	Old Tonalite		-	166	5.2	0.164	557	509000	0.088	-	-	3.4	0.0323	0.558	1.44	0.706	8.77	3.14	41.2	17.62	89.2	22.2	242	54.6	9550	10.15	21.7
BHX_1s_49 - 2	rim	Old Tonalite		-	209	4.62	0.213	717	496000	0.083	-	-	5.35	0.0191	0.416	1.13	0.594	8.67	3.39	48.1	22.1	117.8	30.1	331	75.7	9610	16.16	40.17
BHX_1s_5 - 1	core	Old Tonalite		-	191	5.95	0.181	475.1	484400	0.087	0.019	-	4.48	0.0169	0.407	1.03	0.472	6.99	2.447	32.27	14.76	78.8	20.91	242.9	57.7	9710	10.77	24.37
BHX_1s_5 - 2	rim	Old Tonalite		-	139	4	0.18	273.6	486000	0.1	-	0.0025	2.99	-	0.189	0.58	0.23	3.73	1.491	20.19	8.69	44.5	11.1	122.6	27.84	10430	10.41	23.81
BHX_1s_50 - 1	core	Old Tonalite		7.4	193.1	4.91	-	373.7	499000	0.099	-	-	2.2	0.0187	0.226	0.75	0.388	5.31	1.94	26.45	11.27	59.3	15.55	173.4	41.31	9200	4.5	12.73
BHX_1s_52 - 1	core	Old Tonalite		-	206	3.59	0.2	407.4	484000	0.088	-	-	2.31	-	0.201	0.9	0.473	5.52	2.065	28.69	12.36	66.8	16.71	191.4	47.38	8740	4.96	13.5
BHX_1s_52 - 2	rim	Old Tonalite		-	113.6	4.28	0.16	287	507700	0.071	-	-	2.29	0.0101	0.157	0.53	0.304	3.95	1.43	19.8	8.97	47	12.21	139	32.2	9770	5.27	14.6
BHX_1s_53 - 1	core	Old Tonalite		-	400	5.1	0.83	926	507000	0.09	-	0.32	6.13	0.22	2.64	4.13	1.88	20.17	6.7	78.6	30.92	144.3	34.13	350.3	76.2	9630	22.1	35.02
BHX_1s_53 - 2	rim	Old Tonalite		-	255	6.4	0.297	1228	501000	0.13	-	-	10.02	0.0315	0.58	1.94	0.925	15.57	6.57	88.5	39.7	195.5	47.7	497	110.7	9900	34.7	65.8
BHX_1s_54 - 1	core	Old Tonalite		-	180	5.17	0.234	593	510000	0.092	-	-	3.87	-	0.371	1.1	0.534	7.24	2.8	40.1	18.15	98.6	25.52	283.4	68	9650	9.58	28.6
BHX_1s_54 - 2	rim	Old Tonalite		-	208	5.73	0.168	780	503000	0.13	-	-	5.57	0.017	0.52	1.5	0.668	9.14	3.64	52.5	24.46	127.7	31.8	352	83.8	9600	15.89	44.6
BHX_1s_55 - 1	core	Old Tonalite		47	210	8.2	-	596	507000	0.22	0.18	0.0103	3.86	0.016	0.67	1.36	0.57	8.5	3.117	41.2	18.74	100.6	25.29	273	62.2	8660	14.02	24.1
BHX_1s_56 - 1	core	Old Tonalite		-	238	4.5	0.3	622	475000	0.26	-	-	3.51	0.015	0.5	1.02	0.6	7.38	3.02	42.9	19.35	102.2	25.86	288.7	68.2	8790	10.5	26.14
BHX_1s_57 - 1	core	Old Tonalite		-	177	5.52	-	440	501000	0.11	-	-	2.86	0.0192	0.415	1.09	0.554	6.56	2.31	31.9	13.86	72.4	18.16	201.9	47.4	9070	6.21	16.02
BHX_1s_57 - 2	rim	Old Tonalite		-	228	6.23	0.165	889	504000	0.099	-	-	5.29	0.0259	0.59	1.55	0.762	10.55	4.23	60.7	27.88	148.2	37.74	411.4	96.5	9180	16.16	40.08
BHX_1s_58 - 1	core	Old Tonalite		-	195	4.05	0.147	832	508000	0.1	-	0.0092	4.58	0.087	1.64	3.39	1.42	17	5.55	66.8	26.9	131.2	32.3	347.1	77.3	9780	44.5	59.9
BHX_1s_58 - 2	rim	Old Tonalite		-	187	4.6	0.21	696	509000	0.1	-	-	5.03	0.0144	0.381	1.1	0.585	8.43	3.5	49.85	22.08	115.1	29.55	322.8	74.4	10020	13.74	34.37
BHX_1s_59 - 1	core	Old Tonalite		-	217	6.08	0.152	680	511000	0.11	-	-	4.03	0.0105	0.402	1.26	0.544	8.24	3.35	46.9	21.34	113	29	319.5	75.9	9280	11.13	28.95
BHX_1s_59 - 2	rim	Old Tonalite		-	147	3.86	0.13	426	495000	0.095	-	-	3.48	0.0112	0.239	0.8	0.39	6.06	2.24	30	13.38	69.1	17.4	191.5	44.1	10220	10	22.6
BHX_1s_6 - 2	rim1	Old Tonalite		8	169.6	4.32	0.163	425	486000	0.062	0.069	0.0154	3.47	0.0213	0.357	0.88	0.44	5.79	2.37	30.9	13.43	69.7	17.69	196.1	46.5	10300	11.66	22.82
BHX_1s_6 - 3	rim2	Old Tonalite		-	237	5.52	0.229	835	479100	0.1	-	0.0045	5.77	0.025	0.599	1.58	0.723	11.79	4.54	62.5	26.99	138.5	34.04	364	85.4	9460	23.31	50.01
BHX_1s_60 - 1	core	Old Tonalite		-	202	6.28	0.273	1491	510000	0.091	0.032	0.0159	8.74	0.166	3.33	5.85	2.46	31.6	10.3	124.7	47.4	222.6	51.1	519	109.8	9240	30.9	41
BHX_1s_60 - 2	rim1	Old Tonalite		-	169.2	4.73	0.189	579	503000	0.11	-	-	4.52	0.0111	0.405	1.19	0.486	7.01	2.81	39.6	17.39	94.6	24.81	274.3	65.3	10320	11.31	28.35
BHX_1s_60 - 3	rim2	Old Tonalite		5.6	164	3.51	0.127	516	504000	0.099	0.049	0.0096	4.02	0.0206	0.353	0.97	0.481	7.23	2.58	35.6	15.61	84.9	22.2	254	61.3	10560	16.01	31.52
BHX_1s_61 - 1	core	Old Tonalite		7	310	6.02	0.227	766	509000	0.12	-	-	4.26	0.0201	0.595	1.56	0.827	10.36	4.1	55.6	24.2	126	31.9	349	80.6	8460	15.1	31.2
BHX_1s_61 - 2	rim	Old Tonalite		-	150.3	4.48	0.162	427.3	504000	0.084	-	-	3.4	0.009	0.235	0.698	0.414	5.6	2.12	29.27	13.51	70.2	18.11	203.5	48.09	10060	7.25	19.94
BHX_1s_62 - 1	core	Old Tonalite		-	275	6.69	0.224	627	506000	0.1	-	-	5.25	0.0163	0.6	1.44	0.584	9.98	3.69	49.4	20.31	101.8	24.34	247.4	52.6	9640	12.35	21.85
BHX_1s_62 - 2	rim	Old Tonalite		-	77.4	2.64	0.125	162.3	500000	0.096	-	-	3.2	-	0.111	0.293	0.152	1.65	0.771	10.37	4.85	26.48	7.22	85.7	21.95	13190	11.24	32.5
BHX_1s_63 - 1	core	Old Tonalite		-	211	6.17	0.28	679	501000	0.12	-	-	4.71	0.0273	0.386	1.29	0.693	8.93	3.65	48.6	21.5	109	28.2	303	71.1	9360	15.8	34.2
BHX_1s_64 - 1	core	Old Tonalite		-	263	8.08	0.281	1414	500000	0.1	-	-	9.37	0.097	1.91	4.17	1.673	23.55	8.6	110.2	46.51	228.7	54.8	569	124.3	9000	30.43	48.62
BHX_1s_64 - 2	rim	Old Tonalite		-	162	5.79	0.259	587	494000	0.079	-	-	4.41	0.024	0.406	1.26	0.58	7.38	2.906	39.71	17.91	101.1	25.62	286.8	68.2	9310	8.67	23.3
BHX_1s_65 - 1	core	Old Tonalite		-	148	5.16	0.31	438	531000	0.17	-	0.029	3.39	0.024	0.39	0.81	0.434	5.77	2.317	33	13.13	69.8	18.2	198	46.3	10750	10.26	24
BHX_1s_65 - 2	rim	Old Tonalite		-	265	6.38	0.301	1150	500000	0.12	-	0.0075	8.65	0.0333	0.625	1.77	0.933	15.79	6.26	85.4	37.3	185	45.4	486	112.1	9860	36.2	72
BHX_1s_66 - 1	core	Old Tonalite		-	230	5.55	0.187	1117	506000	0.095	0.034	-	6.45	0.112	2.27	3.91	2.04	23.49	7.83	93.6	36.6	175.2	42.4	441	99.1	9470	26.1	42.2
BHX_1s_66 - 2	rim	Old Tonalite		6.4	158	4.67	0.141	521	498600	0.1	-	0.0061	3.52	0.022	0.352	0.93	0.512	7.04	2.57	36.3	16.1	86.4	21.86	244.2	58.5	9710	9.55	24.45
BHX_1s_67 - 1	core	Old Tonalite		-	256	4.44	0.227	914	499000	0.095	-	-	6.59	0.0291	0.73	1.8	0.948	12.51	4.91	68	30	151.5	36.7	397	92.2	10240	21.9	45.7
BHX_1s_67 - 2	rim	Old Tonalite		5	233	6.56	0.293	1084	503000	0.13	-	-	8.05	0.0217	0.71	1.73	0.886	13.33	5.7	78.6	35.24	179.9	44.58	479.7	110.6	10120	30.14	66.6
BHX_1s_68 - 2	rim	Old Tonalite		-	108.4	4.05	0.14	275.6	507000	0.086	0.03	-	2.4	-	0.2	0.502	0.283	3.71	1.46	19.75	8.52	44.3	11.33	126	30.3	10600	6.54	15.52
BHX_1s_69 - 1	core	Old Tonalite		10	231	6.22	0.215	869	511000	0.095	-	0.0129	5.52	0.038	0.61	1.44	0.779	10.72	4.42	62.6	27.9	146.2	36.1	389	90.3	9530	20.29	38.5
BHX_1s_69 - 2	rim	Old Tonalite		-	490	4.2	0.51	488	476000	0.16	-	0.118	3.6	0.075	0.84	1.89	0.84	8.3	3.13	36.9	15.3	76.4	18.42	199.7	47.6	9790	10.44	20.31
BHX_1s_7 - 1	core	Old Tonalite		-	178	4.27	0.095	458.8	488000	0.091	-	-	3.15	0.0114	0.287	0.865	0.439	6	2.344	32.21	14.39	73.9	19.25	213.5	50	9750	8.07	21.05
BHX_1s_7 - 2	rim1	Old Tonalite		4.9	134.8	4.21	0.207	388	480000	0.1	-	-	3.07	0.0122	0.238	0.72	0.366	5.22	1.945	26.98	12.09	64.3	16.38	184.3	43.6	9840	7.93	21.88
BHX_1s_70 - 1	core	Old Tonalite		-	215	7.8	0.237	1089	484000	0.19	0.12	0.029	8.96	0.107	1.6	2.68	1.35	14.8	5.43	73.2	33.52	184	48.4	519	125.3	8870	36	66.5
BHX_1s_70 - 2	rim	Old Tonalite		-	86.3	2.79	-	174.7	506000	0.09	-	-	3.12	-	0.082	0.291	0.16	2.25	0.84	11.85	5.26	28.9	7.66	89.8	22.63	13030	12.37	35.82
BHX_1s_71 - 1	core	Old Tonalite		-	241	5.92	0.216	833	508000	0.15	-	-	5.6	0.038	0.55	1.51	0.78	11.7	4.55	61.4	27.2	138	34.4	364	84.4	10260	19	39.8
BHX_1s_71 - 2	rim	Old Tonalite		-	176	4.57	0.129	485	501000	0.11	-	-	4.23	0.0119	0.27	0.88	0.529	6.67	2.51	36.4	15.9	80.5	20.5	221	53.3	10240	15.52	35.3
BHX_1s_72 - 1	core	Old Tonalite		-	185	4.62	0.257	642	495400	0.076	-	-	5.01	0.0127	0.48	1.23	0.541	7.74	3.139	44.6	20.47	108.3	27.61	303.4	71	10370	14.78	44.25
BHX_1s_72 - 2	rim	Old Tonalite		-	272	7.22	0.198	1097	501000	0.2	-	-	8.22	0.0158	0.54	1.87	0.864	13.3	5.58	79.6	34.9	180.2	44.2	462	106	9910	32.3	66.3
BHX_1s_73 - 1	core	Old Tonalite		-	226	5.64	0.234	837	494000	0.14	-	-	5.33	0.0217	0.472	1.35	0.721	9.9	4.1	58.7	26.3	138	35.2	380	90.1	9510	18	40.1
BHX_1s_73 - 2	rim	Old Tonalite		-	169	4.61	0.159	783	485000	0.1	-	-	5.06	0.057	1.11	2.67	1.08	13.07	4.82	61	25.69	127.3	30.71	326	74.8	9860	19.15	37.2
BHX_1s_74 - 1	core	Old Tonalite		-	165	4.82	0.159	459	464500	0.09	0.03	0.015	4.19	0.0298	0.58	1.22	0.549	7.49	2.6	34	14.47	74.4	18.68	207	48.6	9680	13.55	24.1
BHX_1s_74 - 2	rim	Old Tonalite		-	116	3.9	0.169	220.5	498000	0.12	-	-	3.23	-	0.171	0.48	0.179	2.79	1.118	15.46	6.69	37.3	9.81	115.1	27.6	11610	13.05	30.1
BHX_1s_75 - 1	core	Old Tonalite		7.1	315	5.72	0.191	678	473000	0.065	0.036	-	3.99	0.0274	0.52	1.57	0.853	10.48	3.8	50.5	21.93	113.2	28.37	308.5	71.4	7880	11.45	23.81
BHX_1s_75 - 2	rim	Old Tonalite		-	155	4.59	0.164	512	478900	0.086	-	0.0043	3.9	0.013	0.314	0.8	0.426	6.47	2.53	35.9	16.08	85.5	22	240.4	57.7	9550	9.7	26.7
BHX_1s_76 - 1	core	Old Tonalite		-	207	4.8	0.223	694	473700	0.11	-	-	4.23	0.033	0.69	1.8	0.896	9.71	3.8	50.8	22.3	108.7	27.9	298	70.5	8920	13.8	28.3
BHX_1s_76 - 2	rim	Old Tonalite		-	142	3.64	-	388	473000	0.1	-	-	3.01	0.0141	0.248	0.6	0.347	4.75	2.01	28.2	12.1	66.8	16.5	185	43.7	9820	8.2	23.4
BHX_1s_77 - 1	core	Old Tonalite		6.3	263	3.74	0.217	558	485000	0.077	-	-	3.7	0.0111	0.316	1.09	0.59	7.8	2.98	41.8	17.6	92	23.5	259	61.1	9580	11.8	29.1
BHX_1s_77 - 2	rim	Old Tonalite		-	270	5.6	0.29	1086	476000	0.11	-	-	8.57	0.027	0.559	1.69	0.864	13.57	5.7	80.8	35.4	179.1	43.5	467	107.4	10200	32.1	70.3
BHX_1s_78 - 2	rim	Old Tonalite		-	68.4	4	0.128	100.5	474800	0.076	-	-	1.66	-	0.045	0.151	0.093	1.29	0.491	6.78	3.017	16.2	4.54	52.5	12.65	10340	2.4	7.81
BHX_1s_78 - 3	rim2	Old Tonalite		5.7	112.2	5.3	0.112	188.6	484000	0.058	-	-	2.91	-	0.13	0.389	0.189	2.89	1.051	14.03	5.92	30.3	7.85	86.4	19.48	9570	6.41	13.64
BHX_1s_79 - 1	core	Old Tonalite		-	212	3.1	0.222	422	483000	0.087	-	-	2.6	0.0109	0.234	0.71	0.368	5.85	2.123	30.3	13.07	68.7	17.83	198.5	47.9	9720	6.33	18.7
BHX_1s_79 - 2	rim	Old Tonalite		-	225	4.77	0.167	749	484800	0.13	-	-	5.61	0.013	0.418	1.15	0.558	8.55	3.78	51.8	23.8	123	31.7	346	80.6	10270	15.3	37.9
BHX_1s_8 - 1	core	Old Tonalite		6.9	258	4.9	0.188	571	484000	0.11	-	-	3.4	0.0203	0.323	1.09	0.603	7.42	2.99	39.8	18.34	96.3	24.7	275	64.7	8850	9.23	23.1
BHX_1s_8 - 2	rim	Old Tonalite		7.1	251	4.3	0.196	505.5	486700	0.081	-	-	2.67	0.0123	0.279	0.91	0.545	6.8	2.682	36.14	15.94	83.8	21.6	243.1	58.2	9040	7.9	20.24
BHX_1s_80 - 1	core	Old Tonalite		-	206	5.78	0.17	793	484400	0.13	-	0.0101	4.45	0.045	0.85	2.27	1.07	12.79	4.56	59.6	25.5	129	31	338	78	8830	14.3	29.2
BHX_1s_80 - 2	rim1	Old Tonalite		-	166	4.83	0.13	574	473000	0.088	-	-	3.62	0.0191	0.308	1.1	0.535	6.73	2.76	39.6	18.2	96.6	24.6	274	65.7	9210	10.1	26.2
BHX_1s_81 - 1	core	Old Tonalite		-	157	4.94	0.265	944	480100	0.098	-	0.0093	6.48	0.113	2.09	3.97	1.541	18.9	6.42	78.4	31.23	150.6	35.93	373	81.3	9070	22.68	29.4
BHX_1s_81 - 2	rim	Old Tonalite		-	145	2.5	0.329	570.7	476800	0.11	-	-	6.2	0.0119	0.271	0.92	0.405	6.5	2.726	38.7	17.77	97.6	25.82	290.3	70.3	12320	13.85	38.94
BHX_1s_82 - 2	rim	Old Tonalite		-	167	4.11	0.147	468	477000	0.12	-	-	2.96	0.0164	0.315	0.91	0.478	5.74	2.44	32	14.88	79.2	20.44	228.7	54.8	9110	7.84	20.6
BHX_1s_83 - 1	core	Old Tonalite		5.3	219	6.15	0.218	769	486000	0.12	-	-	5.53	0.0193	0.505	1.16	0.682	10.06	4.02	56.5	24.51	127.2	30.49	336.3	77.6	9450	21.31	42.7
BHX_1s_83 - 2	rim	Old Tonalite		-	195	4.93	0.186	574	488000	0.11	-	-	4	0.0124	0.413	1.15	0.541	7.3	2.8	38.8	17.7	96.1	24.69	277.4	68.6	9790	12.46	33.49
BHX_1s_84 - 1	core	Old Tonalite		6.5	266	4.96	0.181	682	508000	0.1	-	-	3.82	0.03	0.66	1.75	0.94	9.9	3.86	51.1	21.7	113.7	28	314	74.8	9230	14.1	30.1
BHX_1s_84 - 2	rim	Old Tonalite		6.1	117.2	3.68	-	336	482000	0.1	-	-	2.96	0.0065	0.195	0.7	0.347	4.28	1.8	23.4	10.35	53.6	13.92	153	37.1	10040	8.58	21.6
BHX_1s_85 - 1	core	Old Tonalite		-	266	6.4	0.274	930	500000	0.14	-	-	5.99	-	0.52	1.6	0.92	12.28	4.95	68.4	29.42	156.2	38.7	419	95.9	9570	22.06	47.4
BHX_1s_85 - 2	rim	Old Tonalite		5	114	3.63	-	211.5	483000	0.098	-	-	2.23	-	0.096	0.286	0.166	2.64	1.149	15.52	6.72	35.4	9.03	101.6	24.24	10430	5.14	15.79
BHX_1s_86 - 1	core	Old Tonalite		-	193	4.04	0.226	641	486200	0.091	-	-	4.1	0.048	1.12	2.21	1.04	11.83	4.23	51	21.06	101.3	24.65	265.9	61.9	9490	16.66	30.76
BHX_1s_86 - 2	rim	Old Tonalite		-	235	5.67	0.192	769	476300	0.14	-	-	5.5	0.0326	0.536	1.38	0.636	9.14	3.56	52.5	24.3	126.1	31.9	351	85.4	9680	16.9	47.5
BHX_1s_87 - 1	core	Old Tonalite		-	343	9.26	0.381	1852	486800	0.18	-	-	12.19	0.0435	1.15	2.89	1.597	22.26	9.35	125.3	55	273.2	65.4	674	148.6	8650	59.1	77.2
BHX_1s_87 - 2	rim	Old Tonalite		-	201.1	5.33	0.264	587	485000	0.11	-	-	4.84	0.014	0.319	0.99	0.496	6.79	2.93	40.5	18.14	96	24.22	267.4	62.7	9430	16.93	34.7
BHX_1s_88 - 1	core	Old Tonalite		6.2	142	4.47	0.179	301	479600	0.099	-	-	2.86	-	0.189	0.544	0.278	3.75	1.47	20.7	9.33	48.9	12.5	140	33.5	10000	7.15	19.67
BHX_1s_88 - 2	rim	Old Tonalite		-	175	4.45	0.228	564	472600	0.1	-	-	3.72	0.0122	0.295	1.11	0.504	7.47	2.98	40.5	18.1	94.5	23.9	259	61.8	9430	10.8	25.8
BHX_1s_9 - 1	core	Old Tonalite		-	122	3.16	0.225	247.8	482000	0.096	-	-	3.68	0.0089	0.162	0.416	0.249	3.02	1.216	16.96	7.58	41.2	11.33	133.6	32.34	12170	17.48	47.17
BHX_1s_9 - 2	rim	Old Tonalite		-	119.4	3.09	0.201	342	483300	0.086	-	0.0041	3.46	0.019	0.434	0.97	0.413	5.37	1.99	24.3	10.4	55.1	14.62	171.7	42.02	11710	15.19	32.1
Intermediate Tonalite
BHX_2s_01 - 1	core	Intermediate Tonalite		5.3	175	3.8	-	398	479000	0.08	-	-	2.92	-	0.273	0.85	0.37	4.8	2.03	27.2	12.3	65.5	17.2	193	47.8	10540	11	31.8
BHX_2s_01 - 2	rim	Intermediate Tonalite		-	233	3.78	0.283	856	480700	0.092	-	-	6.99	0.0115	0.379	1.39	0.595	10.57	4.35	58.9	27.6	142.9	35.8	402	93	10910	28.1	72.1
BHX_2s_02 - 1	core	Intermediate Tonalite		-	205	4.6	0.308	671	527000	0.21	-	0.0315	4.43	0.026	0.27	1.07	0.63	8.3	3.56	46.7	21.85	114.9	30	339	78.3	11100	18.68	49.4
BHX_2s_02 - 2	rim1	Intermediate Tonalite		-	238	5.21	0.243	1062	484000	0.16	-	-	8.07	0.0296	0.54	1.63	0.785	13.51	5.6	78.4	34.5	175.7	43.2	477	110.4	10170	41.5	88.5
BHX_2s_02 - 3	rim2	Intermediate Tonalite		-	225	3.32	0.27	845	480000	0.21	-	-	8.7	0.0095	0.415	1.22	0.504	9.72	3.94	57.5	26.5	143.5	37.9	429	101.4	12140	34.1	97.1
BHX_2s_03 - 1	core	Intermediate Tonalite		30.7	228	3.41	0.147	489	483000	0.087	0.094	0.0157	3.01	0.0204	0.349	1.02	0.484	6.68	2.56	34.5	14.8	78.6	20.5	228	55.2	9800	9.17	25.2
BHX_2s_03 - 2	rim1	Intermediate Tonalite		-	141	4.23	0.195	462	478000	0.1	-	-	3.51	0.0115	0.231	0.79	0.339	4.99	2.2	31.7	14.6	77.6	19.7	221	53.4	10310	10.7	30.2
BHX_2s_04 - 1	core	Intermediate Tonalite		-	239	3.55	0.265	681	478000	0.11	0.034	-	4.57	0.0145	0.446	1.07	0.524	7.94	3.3	46.28	21.02	113.8	29.4	334.2	81.2	10690	20.1	60
BHX_2s_05 - 1	core	Intermediate Tonalite		-	103	4.37	0.15	247.2	480000	0.074	-	-	2.96	-	0.184	0.457	0.244	3.02	1.255	16.42	7.48	41.09	10.73	124.8	30.69	9940	5.69	13.69
BHX_2s_05 - 2	rim	Intermediate Tonalite		-	116.8	5.08	0.16	344	475000	0.11	-	-	3.5	0.0176	0.279	0.84	0.42	4.82	1.76	22.9	10.13	55.1	15.02	169	41.4	9570	10.14	21.1
BHX_2s_06 - 1	core	Intermediate Tonalite		-	121	3.32	0.148	306	478000	0.074	-	-	2.76	0.0057	0.19	0.67	0.318	4.2	1.672	21.8	9.34	48.3	12.69	145	34.22	10210	4.99	13.39
BHX_2s_06 - 2	rim	Intermediate Tonalite		-	169	4.24	0.206	555.9	476000	0.11	-	-	4.27	0.0142	0.373	0.89	0.534	6.93	2.64	37.77	17.25	93.2	24.22	269.2	67.6	10210	15.74	44.91
BHX_2s_07 - 1	core	Intermediate Tonalite		-	111.5	3.7	0.12	440.4	476000	0.11	-	-	5.32	0.0116	0.342	0.87	0.431	6.3	2.332	30.58	13.4	68.3	17.59	201.1	48.19	11820	24.8	39.13
BHX_2s_07 - 2	rim	Intermediate Tonalite		-	137	3.75	0.147	311	473600	0.087	-	-	3.3	-	0.152	0.521	0.262	4.09	1.646	22.07	9.59	51.6	13.18	149.8	36.1	10740	13.54	36.86
BHX_2s_08 - 1	core	Intermediate Tonalite		-	140	2.73	0.21	439.7	474200	0.086	-	-	3.42	0.0182	0.359	1.11	0.452	7.16	2.724	33.43	13.93	69.8	17.22	187	44.34	11150	15.21	30.85
BHX_2s_08 - 2	rim	Intermediate Tonalite		9.1	164	3.99	0.227	640	484000	0.12	0.051	-	5.05	-	0.489	1.39	0.531	8.62	3.54	47.2	20.5	105.3	26.5	288	67	10690	20.6	47.7
BHX_2s_09 - 1	core	Intermediate Tonalite		-	114.2	3.51	0.149	265.9	484000	0.079	-	-	2.76	-	0.171	0.516	0.351	4.22	1.555	19.29	8.15	43.2	11.16	131.3	32.93	10680	9.5	19.83
BHX_2s_12 - 1	core	Intermediate Tonalite		-	250	2.89	0.141	512	484000	0.09	-	-	3.15	0.009	0.262	0.89	0.408	6.57	2.69	36.1	16.27	86.7	22.1	250	60.5	10410	10.43	30.8
BHX_2s_12 - 2	rim	Intermediate Tonalite		-	210	4.3	0.222	606	482000	0.12	0.031	0.0074	4.99	0.0111	0.361	1.07	0.49	7.48	3.02	42.1	18.7	98.1	24.9	278	65.6	10480	33.5	67.6
BHX_2s_13 - 1	core	Intermediate Tonalite		6.5	346	3.31	0.261	834	483600	0.1	0.039	0.0227	5.81	0.035	0.455	1.49	0.615	10.64	4.21	58.4	26.4	139.2	35.5	393	94.5	11110	33.1	78.2
BHX_2s_13 - 2	rim	Intermediate Tonalite		-	239	4.23	0.26	743	478100	0.11	0.036	0.0198	9.45	0.0222	0.356	1.26	0.496	9.44	3.8	52.4	23.4	121.9	30.6	330	77.5	11850	80.3	137.1
BHX_2s_14 - 1	core	Intermediate Tonalite		-	278	8.06	0.242	1194	485000	0.17	-	-	8.03	0.0291	0.65	1.82	0.923	11.62	5.16	77.5	36.8	203.7	52.3	583	137.8	9150	31.56	73.2
BHX_2s_14 - 2	rim	Intermediate Tonalite		-	108	2.56	0.232	353	475000	0.085	-	-	3.33	0.01	0.213	0.7	0.313	4.6	1.88	24.7	11.01	59.6	15.8	186.3	47.9	11160	9.11	26.9
BHX_2s_15 - 1	core	Intermediate Tonalite		-	123	4.95	0.132	320.6	484000	0.071	-	-	3.25	0.0182	0.379	0.89	0.416	4.94	1.75	23.11	9.89	52.47	13.69	161.3	39	9480	9.92	19.15
BHX_2s_15 - 2	rim	Intermediate Tonalite		-	97.4	1.53	0.176	328.8	480000	0.08	-	-	8.82	-	0.173	0.53	0.203	3.98	1.539	21.85	9.72	54.2	14.49	173.1	43.2	14260	44.6	107.9
BHX_2s_16 - 1	core	Intermediate Tonalite		-	121	5.8	0.199	383.2	482000	0.086	-	-	4.08	0.0191	0.371	0.94	0.404	5.7	2.06	26.47	11.69	62.4	16.25	185.4	44.57	9340	11.75	23.35
BHX_2s_16 - 2	rim	Intermediate Tonalite		-	160	3.33	-	447	481000	0.088	-	-	4.27	0.0081	0.302	0.692	0.431	6.01	2.377	33.1	14.46	74.5	18.62	206.9	48.6	10990	24.13	47.22
BHX_2s_17 - 1	core	Intermediate Tonalite		-	270	6.17	0.344	1084	480600	0.14	-	-	7.94	0.032	0.64	1.73	0.784	12.49	5.04	73.9	34.45	180.8	45.22	486	115.3	9920	36.53	82.9
BHX_2s_17 - 2	rim	Intermediate Tonalite		-	145	3.41	0.108	272.8	479100	0.066	-	-	3.14	0.0112	0.152	0.55	0.238	3.53	1.427	19.56	8.53	43.8	10.79	120	29.07	10610	20.13	42
BHX_2s_18 - 1	core	Intermediate Tonalite		-	183	6.12	0.175	586	488000	0.066	-	-	5.18	0.037	0.84	1.73	0.689	9.66	3.49	45.3	18.54	94	23.01	248.2	56	8960	14.4	24.68
BHX_2s_18 - 2	rim	Intermediate Tonalite		-	133	5.39	0.167	360.6	481700	0.085	-	-	3.76	0.027	0.304	0.79	0.401	6.16	2.033	26.92	11.24	59	14.95	168	40.59	9290	8.75	17.88
BHX_2s_19 - 1	core	Intermediate Tonalite		-	144	3.91	0.14	328	470000	0.081	-	-	2.46	0.0097	0.207	0.576	0.364	4.26	1.798	23.4	10.38	52.7	13.53	152	36.1	9600	7.93	19.65
BHX_2s_20 - 2	rim	Intermediate Tonalite		-	190	4.52	0.192	643	481000	0.11	-	-	5.05	-	0.352	1.04	0.447	8.21	3.27	44.7	20	108.4	27.47	309	74.4	10460	18.59	51.6
BHX_2s_22 - 1	core	Intermediate Tonalite		-	175	3.01	0.208	563	483000	0.092	-	-	4.29	0.0166	0.288	0.93	0.533	7.17	2.85	38.6	17.7	95	24.45	276.2	66.8	10860	13.47	39
BHX_2s_22 - 2	rim	Intermediate Tonalite		-	156	2.59	0.236	351	483000	0.11	-	-	4.18	0.0101	0.14	0.592	0.26	4.34	1.76	24.7	10.8	58.3	14.75	163.2	39.6	11710	22.2	65
BHX_2s_23 - 1	core	Intermediate Tonalite		-	116.2	5.05	0.254	354.2	477000	0.12	-	-	3.37	0.0224	0.365	0.8	0.396	4.81	1.829	24.2	10.65	58.4	15.71	184	45.8	9480	10.59	22.48
BHX_2s_23 - 2	rim	Intermediate Tonalite		-	116	2.98	0.144	337	481700	0.098	-	-	3.98	0.0117	0.191	0.7	0.267	4.28	1.651	22.7	10.3	56.9	14.92	176.3	44.2	11820	14.69	38.5
BHX_2s_24 - 1	core	Intermediate Tonalite		-	198	8.05	0.26	684	511000	0.15	-	-	6.16	0.024	0.632	1.34	0.6	8.27	3.26	46.2	21.5	116	30.2	341	80.3	9250	13.5	29.8
BHX_2s_24 - 2	rim	Intermediate Tonalite		6.4	125.6	3.03	0.147	207.7	478000	0.073	-	-	2.42	-	0.1	0.417	0.181	2.93	1.174	14.87	6.49	33.5	8.57	94.1	22.92	10860	14.69	31.1
BHX_2s_25 - 1	core	Intermediate Tonalite		-	265	5.31	0.215	1178	476600	0.14	-	-	8.63	0.0258	0.72	1.73	0.917	13.58	5.84	83.8	38.08	197.6	49.25	531.6	123	9750	27.6	65.6
BHX_2s_25 - 2	rim	Intermediate Tonalite		-	137	3.85	0.169	238.2	478000	0.086	-	-	2.92	0.0079	0.168	0.375	0.126	2.72	1.251	16.35	7.43	38.29	10.07	110.5	26.01	11000	13.48	34.25
BHX_2s_26 - 1	core	Intermediate Tonalite		-	258	2.72	0.194	642	491200	0.1	-	0.0084	4.45	0.0145	0.332	1.19	0.498	8.67	3.23	44.9	19.94	104.1	27.36	301.2	73.2	10830	20.25	52.6
BHX_2s_26 - 2	rim	Intermediate Tonalite		-	192	4.91	0.156	748	484000	0.11	-	-	6.06	0.0173	0.335	1.18	0.554	8.84	3.79	51.8	23.39	123.9	30.87	343.2	83.5	10520	26	62.5
BHX_2s_27 - 1	core	Intermediate Tonalite		-	261	6.25	0.276	1010	485000	0.12	-	-	6.98	-	0.602	1.59	0.781	13.07	5.28	73.5	31.9	165.7	40.7	439	103.2	9760	42.6	85.6
BHX_2s_27 - 2	rim	Intermediate Tonalite		-	231	2.95	0.216	752	480000	0.14	0.024	0.0077	10.53	0.0165	0.361	1.3	0.58	9.47	3.97	56.6	24.29	123.8	29.44	317.1	71.9	12090	127.2	200.1
BHX_2s_28 - 1	core	Intermediate Tonalite		-	169	4.7	0.13	667	529000	0.15	-	-	4.46	0.038	1.1	2.26	1.12	12.78	4.21	53	21.24	105.7	25.75	266.5	61.4	10360	16.14	29.36
BHX_2s_28 - 2	rim	Intermediate Tonalite		-	122	3.12	-	346	486000	0.098	0.028	-	3.17	0.0124	0.207	0.657	0.317	4.45	1.736	23.42	10.52	56.2	14.53	163.8	40.23	11110	12.67	32.06
BHX_2s_29 - 1	core	Intermediate Tonalite		-	221	5.6	0.114	538	494000	0.07	-	-	3.27	0.02	0.58	1.34	0.619	7.9	2.88	40.3	17.13	88.5	22.44	238.2	56.6	8640	7.5	17.73
BHX_2s_29 - 2	rim	Intermediate Tonalite		5.6	113.8	3.77	0.147	169.3	492000	0.084	-	-	2.08	-	0.102	0.269	0.172	2.3	0.887	12.11	5.33	27.93	7.13	79.4	19.03	10150	5.56	14.71
BHX_2s_30 - 1	core	Intermediate Tonalite		-	64.7	2.68	0.156	120.2	489000	0.085	-	-	2.36	-	0.058	0.14	0.087	1.38	0.498	7.73	3.51	19.48	5.25	64.1	16.37	12800	7.45	24.16
BHX_2s_30 - 2	rim	Intermediate Tonalite		-	183	2.75	0.229	997	492000	0.12	-	-	7.91	0.045	1.09	2.98	1.14	18.7	6.64	83.2	33.4	161.3	37.7	390	86.2	12350	44.6	78.1
BHX_2s_31 - 1	core	Intermediate Tonalite		-	319	7.6	0.33	1544	522000	0.22	-	0.0122	10.83	0.043	0.76	2.55	1.314	20.4	8.09	110.9	46.8	236.7	56.7	605	133	9750	45.1	77.5
BHX_2s_31 - 2	rim	Intermediate Tonalite		-	238	2.85	0.15	460.5	467000	0.16	-	-	3.25	-	0.26	0.89	0.394	5.64	2.22	33.2	14	75	19.16	222.7	56.02	10240	14.03	36.59
BHX_2s_32 - 1	core	Intermediate Tonalite		-	365	3.79	0.222	1010	488800	0.14	-	-	7.26	0.0265	0.56	1.86	0.796	12.3	5.16	70.1	32.4	166	41.3	446	108.4	10210	43.4	84.8
BHX_2s_32 - 2	rim	Intermediate Tonalite		-	176	3.93	-	524	487000	0.12	-	-	4.89	0.0166	0.285	1	0.448	6.72	2.63	36.49	16.61	87.4	22.49	247.7	58.8	10890	18.97	49.7
BHX_2s_33 - 1	core	Intermediate Tonalite		-	197	3.22	0.204	445	494000	0.071	-	-	2.79	0.0108	0.258	1.06	0.461	6.56	2.55	31.2	13.9	70.7	18.4	206	49.9	10780	11.6	30.3
BHX_2s_33 - 2	rim	Intermediate Tonalite		-	245	4.27	0.303	553	492000	0.098	-	0.104	5.31	0.053	0.63	0.98	0.432	7.29	2.77	38.8	17.14	90.2	22.73	256.3	61.2	10720	27	55.3
BHX_2s_34 - 1	core	Intermediate Tonalite		9	193	3.24	0.206	383	490000	0.08	-	-	2.62	0.0168	0.263	0.76	0.39	5.47	2.074	27.1	11.88	63.3	15.92	184	44.6	10160	8.17	23.7
BHX_2s_34 - 2	rim	Intermediate Tonalite		-	254	4.41	0.204	1050	493000	0.14	-	-	9.12	0.0216	0.388	1.66	0.646	12.61	5.07	72.1	33.7	181.9	45.3	495	116.8	11670	37.8	99
BHX_2s_35 - 1	core	Intermediate Tonalite		-	158.4	4.54	0.263	690	484000	0.073	-	-	3.8	0.066	1.48	2.48	1.245	14.23	4.65	55.9	22.33	110.1	26.01	274.9	63.7	9460	13.45	25.38
BHX_2s_35 - 2	rim	Intermediate Tonalite		-	136	3.96	0.159	402	486000	0.11	-	-	3.28	0.0124	0.211	0.66	0.296	4.61	1.885	27.1	12.4	67.6	17.93	200.5	48.3	11130	21.8	41.8
BHX_2s_36 - 1	core	Intermediate Tonalite		-	123	4.42	0.18	441	501000	0.099	-	-	4.11	0.013	0.481	1.23	0.51	8.24	2.67	32.5	13.63	69.2	17.53	192.2	44.9	10380	12.04	22.5
BHX_2s_36 - 2	rim	Intermediate Tonalite		-	115.1	3.48	-	226.3	488700	0.075	-	-	3.09	0.0079	0.129	0.456	0.205	2.68	1.066	14.81	6.94	36.87	9.59	108.4	26.29	11620	11.26	33.32
BHX_2s_37 - 1	core	Intermediate Tonalite		-	244	6.58	0.244	1021	483000	0.13	0.025	-	8.44	0.0296	0.578	1.64	0.79	12.8	5.24	73	32.2	165	40.7	444	103.6	10140	54.6	97.3
BHX_2s_37 - 2	rim	Intermediate Tonalite		-	219	4.02	0.174	687	493000	0.12	-	-	7.88	0.0199	0.403	1.33	0.608	10.17	3.93	50.08	21.92	111.1	26.91	289.8	67.3	10860	73.6	95.3
BHX_2s_38 - 1	core	Intermediate Tonalite		-	158.4	5.99	-	454.8	484600	0.083	-	-	4.27	0.0162	0.455	0.97	0.419	6.77	2.43	30.46	13.64	75.1	19.66	223.9	53.8	9620	12.59	26.43
BHX_2s_38 - 3	rim2	Intermediate Tonalite		-	104	1.78	0.256	451	485000	0.18	-	-	12.13	0.0169	0.242	0.71	0.298	5.48	2.09	30.07	13.79	73.9	19.83	227.6	55.6	15730	94	205.3
BHX_2s_39 - 1	core	Intermediate Tonalite		-	105	2.04	0.28	640	495000	0.29	-	-	12	0.012	0.24	0.8	0.385	6.2	2.84	38.3	19.2	101	28	326	79	14590	48	116
BHX_2s_39 - 2	rim	Intermediate Tonalite		-	176	4.58	0.249	605	488000	0.1	-	-	4.61	0.03	0.328	0.92	0.521	7.22	2.91	41	18.82	99.3	25.03	280.6	68.3	10480	16.82	44.9
BHX_2s_40 - 1	core	Intermediate Tonalite		-	94	4.1	0.18	201	553000	0.25	-	-	2.31	-	0.142	0.37	0.174	2.4	0.99	13.4	6.01	32.9	8.65	97.3	22.4	11780	6.48	16.1
BHX_2s_40 - 2	rim	Intermediate Tonalite		-	108.4	2.96	0.18	304	485000	0.082	-	-	2.85	0.0139	0.163	0.58	0.243	3.62	1.515	20.77	9.3	50.7	13.11	145.8	35.9	10930	8.4	24.95
BHX_2s_41 - 1	core	Intermediate Tonalite		-	172	3.27	-	470	534000	0.12	-	-	3.27	0.023	0.222	0.76	0.401	6.36	2.28	33.6	15.1	80.1	21.4	240	56.8	11290	13.3	38.8
BHX_2s_41 - 2	rim	Intermediate Tonalite		-	171	3.82	0.155	645	485000	0.12	-	-	4.78	0.0162	0.394	1.16	0.472	7.95	3.16	43.5	20.2	107.7	27.5	306	72.6	10470	19.9	52.1
BHX_2s_42 - 1	core	Intermediate Tonalite		-	197	4.29	0.282	581	494600	0.11	-	-	4.32	0.0178	0.38	1.05	0.446	7.04	2.807	38.8	17.82	94.3	24.61	275.2	67.4	10580	16.58	46.6
BHX_2s_42 - 2	rim	Intermediate Tonalite		-	190	4.94	0.214	589	494000	0.1	-	-	4.96	0.02	0.309	1.02	0.458	6.88	2.91	40	18.05	95.6	24.05	267.1	64.5	10430	26.17	60.38
BHX_2s_43 - 1	core	Intermediate Tonalite		-	167	6.21	0.224	1290	504000	0.15	-	0.017	8.8	0.144	2.71	4.74	1.93	22.3	7.7	96	39.2	190	45.8	476	104	9350	39.3	50.7
BHX_2s_43 - 2	rim	Intermediate Tonalite		5.6	103.8	4.38	0.21	308	494100	0.084	0.043	0.0115	4.2	0.0195	0.275	0.63	0.255	4.58	1.618	21.61	9.45	49.6	13.06	147.5	35	10680	12.77	23.92
BHX_2s_44 - 1	core	Intermediate Tonalite		-	113	4	0.22	352.5	494300	0.063	-	-	3.25	0.0199	0.362	0.71	0.408	5.1	1.918	24.81	10.81	55.7	14.25	160.5	39.09	10480	9.73	21.1
BHX_2s_44 - 2	rim1	Intermediate Tonalite		-	154	4.3	0.213	534	487700	0.11	-	-	4.05	0.015	0.317	0.84	0.417	6.22	2.572	36.13	16.53	87	22.66	253.4	62	10600	17.5	48.7
BHX_2s_45 - 1	core	Intermediate Tonalite		-	196	3.16	0.164	596	492000	0.093	-	-	4.18	0.0204	0.368	0.92	0.514	7.8	2.944	41.2	18.39	97.9	24.94	281.4	68.8	10950	18.39	50.1
BHX_2s_45 - 2	rim	Intermediate Tonalite		-	136	2.84	-	329.8	491400	0.087	-	-	3.72	0.0111	0.192	0.58	0.246	4.3	1.667	22.71	10.18	53.99	13.84	153.3	37.06	11510	18.82	49.94
BHX_2s_46 - 1	core	Intermediate Tonalite		-	115.9	5.38	0.242	344.5	495000	0.08	-	-	3.14	0.0144	0.299	0.68	0.419	5.42	1.699	22.81	10.02	56.8	15.21	183.5	46.39	9880	9.49	21.61
BHX_2s_46 - 2	rim	Intermediate Tonalite		-	100	3.67	0.144	154.3	493500	0.08	-	-	2.41	-	0.072	0.233	0.131	1.81	0.673	9.72	4.49	25.19	6.7	79	19.75	11640	9.97	26.9
BHX_2s_47 - 1	core	Intermediate Tonalite		-	208	4.16	0.231	756	494300	0.13	-	-	5.8	-	0.352	1.11	0.526	8.63	3.7	51.9	24.01	125.7	31.79	349.5	83	11000	21.9	58.41
BHX_2s_47 - 2	rim	Intermediate Tonalite		-	245	4.28	0.276	1058	494000	0.12	-	-	8.45	0.0229	0.447	1.58	0.675	12.6	5.01	73.3	33.24	174.9	44.12	484.7	116.4	10980	37.19	98.3
BHX_2s_48 - 1	core	Intermediate Tonalite		-	85.6	2.89	0.196	198.5	502000	0.11	-	-	2.66	-	0.128	0.334	0.192	2.63	0.878	13.28	5.87	31.8	8.23	97.3	24.2	12360	11.65	32.09
BHX_2s_49 - 1	core	Intermediate Tonalite		-	201	2.89	0.306	651	490000	0.12	-	-	5.92	0.0135	0.296	1.09	0.434	7.58	3.04	42.42	19.81	107.5	28.4	324.9	79.2	11980	21.81	64.1
BHX_2s_49 - 2	rim	Intermediate Tonalite		-	186	5.22	0.3	635	474000	0.15	-	-	6	0.03	0.35	1.37	0.5	8.35	3.33	44.5	20.5	101.9	24.87	277	67.2	10410	31.99	64.3
BHX_2s_50 - 1	core	Intermediate Tonalite		-	188	4.28	0.221	735	511000	0.13	0.041	-	5.51	0.018	0.45	1.28	0.579	8.98	3.68	50.4	22.8	119.5	30.5	342	82.2	10450	24	60.8
BHX_2s_50 - 2	rim	Intermediate Tonalite		-	152.1	3.79	0.138	391	491000	0.1	-	-	4.12	-	0.264	0.67	0.295	5.12	2.052	27.99	12.31	64.1	16.02	180.4	43.8	11040	16.61	42.09
BHX_2s_52 - 1	core	Intermediate Tonalite		-	117	5.36	0.126	348.8	501000	0.087	-	-	3.53	0.0097	0.4	0.86	0.361	5.26	1.956	24.61	10.67	56.95	14.76	169.2	41.34	9900	10.8	21.93
BHX_2s_52 - 2	rim	Intermediate Tonalite		-	115	3.54	0.168	499	493300	0.09	-	-	4.38	0.0274	0.9	1.67	0.805	9.76	3.2	38.3	15.65	77.5	19.18	212.9	50	11340	24.08	38.1
BHX_2s_53 - 1	core	Intermediate Tonalite		-	309	6.76	0.41	3200	497000	0.22	0.043	0.0298	22.3	0.32	5.71	11.1	4.22	59.7	19.5	233	88.8	412	93.8	913	196	9130	152	125
BHX_2s_53 - 2	rim1	Intermediate Tonalite		-	95.8	4.26	-	249.4	490000	0.076	-	-	3.29	0.0131	0.257	0.62	0.275	3.87	1.385	18.3	7.81	40.3	10.13	110.4	26.01	10650	11.5	21.42
BHX_2s_53 - 3	rim2	Intermediate Tonalite		-	104	4.1	0.152	175.5	501000	0.093	-	-	3.07	-	0.071	0.242	0.173	2.09	0.814	11.82	5.18	28.2	7.42	89.1	21.71	11360	9.67	25.5
BHX_2s_54 - 1	core	Intermediate Tonalite		-	199	4.61	0.209	670	502500	0.11	-	-	3.89	0.0418	0.83	1.96	0.909	10.92	3.95	51.3	20.92	108.9	26.2	285	67.9	9250	11.88	24.15
BHX_2s_54 - 2	rim1	Intermediate Tonalite		6.1	236	6.76	0.251	977	493900	0.12	-	-	6.34	0.0171	0.531	1.58	0.862	12.53	5.06	70.2	31.1	159.6	40	424	100.1	9220	23.3	45.4
BHX_2s_54 - 3	rim2	Intermediate Tonalite		-	136.5	4.08	0.16	284	496000	0.094	0.021	0.0074	2.96	-	0.176	0.594	0.266	3.77	1.584	20.58	8.95	45.3	11.25	125.7	29.1	10530	12.48	24.88
BHX_2s_55 - 1	core	Intermediate Tonalite		-	399	6	0.34	2100	503000	0.29	0.039	-	15.7	0.033	0.88	2.6	1.2	24.1	9.74	136	60	300	73	772	177	11040	90.4	168
BHX_2s_55 - 2	rim	Intermediate Tonalite		-	220	4.48	0.152	881	499900	0.17	-	-	8.55	0.028	0.469	1.45	0.553	10.01	4.29	61.2	28.03	148.3	37.1	402.1	92.8	11610	34.45	87.7
BHX_2s_56 - 1	core	Intermediate Tonalite		-	136	3.95	-	492	493200	0.081	-	-	4.4	0.0141	0.522	1.38	0.597	8.19	2.85	37.9	15.83	79.7	19.2	202	45.4	9980	9.39	18.3
BHX_2s_56 - 2	rim	Intermediate Tonalite		-	250	4.11	0.25	756	488100	0.13	-	-	8.64	0.0218	0.436	1.41	0.581	11.17	4.35	56.9	24.11	121.4	28.9	307.9	71.9	10930	82.6	115.1
BHX_2s_57 - 1	core	Intermediate Tonalite		-	141	6.46	-	422.1	500000	0.086	-	-	4.48	0.022	0.431	1	0.441	6.13	2.049	28.02	12.51	69.9	18.74	221.9	55.4	9360	11.05	26.4
BHX_2s_57 - 2	rim	Intermediate Tonalite		-	181	3.97	0.239	498	500000	0.087	-	-	6.15	0.0124	0.349	0.82	0.419	6.67	2.55	35.38	15.66	81.6	20.05	215.7	50.1	11050	46.3	87.3
BHX_2s_58 - 1	core	Intermediate Tonalite		-	269	4.74	-	796	493000	0.14	0.032	-	5.43	0.0186	0.6	1.8	0.84	11.9	4.34	57.1	25.1	129	32.1	347	83	9600	21.5	46.1
BHX_2s_58 - 2	rim	Intermediate Tonalite		-	219.1	3.8	0.209	687	492600	0.12	0.031	-	6.84	0.0125	0.348	1.21	0.552	9.09	3.6	48.6	21.6	110.3	27.4	288	66.6	10880	33	67.6
BHX_2s_59 - 1	core	Intermediate Tonalite		-	165.6	2.87	0.143	519	497000	0.082	-	-	4.44	0.0117	0.226	0.82	0.359	6.12	2.46	34.63	16.04	86.1	22.3	253.8	61.2	11900	14.62	43.7
BHX_2s_59 - 2	rim	Intermediate Tonalite		-	215	2.3	0.28	881	483700	0.17	-	-	10.09	0.0208	0.404	1.39	0.529	9.97	4.03	56.8	26.93	150.6	40.95	477	116.3	13190	34.8	109.8
BHX_2s_60 - 1	core	Intermediate Tonalite		-	162	5.1	0.281	727	504400	0.075	-	0.0082	4.51	0.055	1.44	2.95	1.248	15.47	5.07	59.9	23.61	113.2	26.67	278.4	63	10050	19.17	32.47
BHX_2s_60 - 2	rim	Intermediate Tonalite		-	190	4.34	-	526	486000	0.15	-	-	5.5	0.0155	0.308	0.95	0.46	7.59	2.93	39.3	16.81	84.4	20.4	220.9	52.8	10570	59.1	94
BHX_2s_61 - 1	core	Intermediate Tonalite		-	199	3.18	0.184	714	492300	0.12	0.044	-	5.25	0.049	1.03	2.37	0.81	12.4	4.18	52.3	23	113.5	27.2	308	71.4	10850	24.2	50.6
BHX_2s_61 - 2	rim	Intermediate Tonalite		-	199.2	3.24	0.231	600.3	492800	0.11	-	-	5.82	0.0124	0.301	0.9	0.477	7.43	2.96	40.7	18.36	100.2	26.28	296.3	71.7	11950	29.57	78.8
BHX_2s_62 - 1	core	Intermediate Tonalite		6.5	199	6.02	0.258	1140	499000	0.15	-	0.0149	9.1	0.156	2.96	5.77	2.5	27.1	8.5	99	37.4	177	41.5	432	94.5	9390	58.9	64.1
BHX_2s_62 - 2	rim	Intermediate Tonalite		7.1	170	4.36	0.194	699	487000	0.095	-	0.0093	5.23	0.076	1.54	2.8	1.23	13.7	4.49	53.4	22.2	108.6	25.6	289	65.3	10090	26.8	43.8
BHX_2s_63 - 1	core	Intermediate Tonalite		-	123.1	1.85	0.277	592	492000	0.094	-	-	5.92	0.0114	0.447	1.57	0.688	8.9	3.47	45.3	18.38	92.8	23.08	251.3	58.4	12760	25.23	48.7
BHX_2s_63 - 2	rim	Intermediate Tonalite		9.2	105	2.7	0.25	316	551000	0.2	0.089	-	3.67	-	0.28	0.46	0.205	4.48	1.57	22.1	9.37	52.3	14.76	180	43.4	14700	12.12	36.1
BHX_2s_64 - 1	core	Intermediate Tonalite		6.1	212	3.62	-	447.3	493300	0.092	-	-	2.82	-	0.227	0.83	0.473	6.11	2.318	30.35	13.96	73.9	19.12	219.9	53.28	10000	7.49	20.83
BHX_2s_64 - 2	rim	Intermediate Tonalite		-	150	3.84	-	499	488600	0.077	-	-	4.08	0.0155	0.271	0.9	0.477	6.57	2.58	35.2	15.3	81	21.03	237.8	57.7	10910	14.32	36
BHX_2s_65 - 1	core	Intermediate Tonalite		-	219	4.14	0.335	750	495000	0.2	-	-	5.47	0.043	0.85	2.28	0.79	13	4.54	58.1	23.8	126	32.9	370	84	13400	91	152
BHX_2s_65 - 2	rim	Intermediate Tonalite		-	295	3.99	0.363	960	489200	0.3	0.037	-	8.2	0.0292	0.91	2.24	0.72	14.3	5.65	74.6	31.3	166	41.7	453	104	11860	117	145
BHX_2s_66 - 1	core	Intermediate Tonalite		-	216	7.47	0.246	2010	497000	0.15	-	0.0183	12.15	0.18	3.47	6.02	2.12	36.7	12.81	156	62.1	284	62.8	616	125.1	9540	69.2	65.8
BHX_2s_66 - 2	rim	Intermediate Tonalite		-	94.8	3.34	0.313	181.7	492200	0.096	-	-	3.16	0.0124	0.144	0.274	0.15	2.04	0.8	11.88	5.34	29.82	8.19	97.7	24.71	12000	11.51	31.51
BHX_2s_67 - 1	core	Intermediate Tonalite		-	485	4.94	0.29	1930	514000	0.16	-	0.0097	12.04	0.06	1.39	3.65	1.56	25.2	9.08	123.5	53.3	271.6	66.4	707	164.5	9990	96.1	144.4
BHX_2s_67 - 2	rim	Intermediate Tonalite		-	-	3.59	-	687	514800	0.12	-	-	-	-	-	-	-	8.7	3.42	47.4	21.48	115	29.11	324.4	79.7	12160	29.66	83.5
BHX_2s_68 - 1	core	Intermediate Tonalite		-	283	7.41	0.187	973	491000	0.11	-	-	6.07	0.0237	0.57	1.67	0.78	11.24	4.72	66.9	30.5	159.1	39.73	426.3	99.7	8660	17.09	38.86
BHX_2s_68 - 2	rim	Intermediate Tonalite		-	181	4.71	0.277	661	497000	0.12	-	-	4.98	0.0158	0.335	1	0.543	7.62	3.21	44.5	20.8	110.7	27.4	302	71	9800	13.36	33.9
BHX_2s_70 - 1	core	Intermediate Tonalite		-	227	3.77	0.167	545	489000	0.099	0.027	-	3.37	0.0153	0.264	0.93	0.554	6.98	2.86	37.8	16.6	88.6	22.1	244	60.5	9420	10.4	29.1
BHX_2s_70 - 2	rim	Intermediate Tonalite		-	164	4.86	0.208	376	493000	0.065	-	-	3.23	0.0123	0.248	0.64	0.388	4.99	1.97	26.7	11.69	61.2	15.8	172	41	10030	13.03	29.71
BHX_2s_72 - 1	core	Intermediate Tonalite		15.6	106.7	-	0.125	254.2	486000	0.079	0.057	0.0125	2.71	0.0151	0.267	0.73	0.258	4.2	1.47	18.8	8.03	40.4	10.43	115.8	27.69	10680	26.1	24.5
BHX_2s_73 - 1	core	Intermediate Tonalite		-	78	2.5	0.182	186.4	489000	0.07	-	-	1.85	-	0.117	0.338	0.198	2.47	0.943	12.59	5.6	30.54	8.28	96.4	23.95	11980	5.51	16.63
BHX_2s_73 - 2	rim	Intermediate Tonalite		-	121.7	4.33	0.198	365.9	491200	0.076	-	-	3.07	0.0097	0.35	0.838	0.401	5.17	1.907	24.46	11.18	61.6	16.59	195.7	49	9920	8.8	21.25
BHX_2s_74 - 1	core	Intermediate Tonalite		-	96.1	2.15	0.145	254.5	502000	0.084	-	-	2.97	-	0.143	0.356	0.201	2.57	1.122	16.17	7.66	42.6	11.52	136.2	33.92	12930	8.95	29.6
BHX_2s_74 - 2	rim	Intermediate Tonalite		-	196	2.5	0.138	474.9	500000	0.093	-	-	3.25	-	0.276	0.89	0.367	5.79	2.324	32.83	14.91	78.1	20.92	234.9	57.29	11900	12.64	39.66
BHX_2s_75 - 1	core	Intermediate Tonalite		-	320	5.7	0.37	1493	481000	0.21	-	-	13.11	0.028	0.685	1.99	0.966	17.73	7.56	106.2	48.4	241.9	58.6	619	144.6	10440	79.7	140.4
BHX_2s_75 - 2	rim	Intermediate Tonalite		8.4	281	6.21	0.303	1028	488000	0.14	-	-	11.87	0.0278	0.68	1.82	0.814	14.98	5.75	79.6	33.4	165.9	40.3	427	99.3	10690	100.7	143.7
BHX_2s_76 - 1	core	Intermediate Tonalite		-	227	3.24	0.17	566	534000	0.2	-	-	3.68	0.013	0.41	1.23	0.514	6.91	2.89	39.2	17.5	93.2	24.3	268	64	10850	13.77	37.7
BHX_2s_76 - 2	rim	Intermediate Tonalite		-	148.8	4.4	0.173	325.1	487000	0.073	-	-	2.89	-	0.247	0.7	0.292	4.36	1.66	22.26	9.89	53.8	13.98	158.4	38.8	10300	12.04	29.64
BHX_2s_77 - 1	core	Intermediate Tonalite		-	420	9.3	0.401	2923	487000	0.2	-	-	19.81	0.065	1.06	3.64	1.744	32.9	13.39	181.1	76.9	375	88.4	891	197.7	9920	144	194.5
BHX_2s_77 - 2	rim	Intermediate Tonalite		-	180	3.85	0.165	678	480900	0.12	-	-	5.7	0.0173	0.289	1.06	0.529	7.68	3.281	45.99	21.34	112.8	28.09	311.7	74.7	10560	24.26	59.55
BHX_2b_01 - 1	core	Intermediate Tonalite		-	126.7	3.6	0.212	491	486000	0.073	-	-	4.5	0.0242	0.68	1.67	0.823	10.1	3.17	38.51	15.4	75.8	19.2	213.3	50.5	11050	21.54	31.75
BHX_2b_01 - 2	rim	Intermediate Tonalite		-	123	3.45	-	403	492000	0.11	-	0.0074	4.22	0.0131	0.22	0.71	0.261	4.79	1.87	28.2	12.6	66.1	17.4	193	46.3	13100	15.3	46.4
BHX_2b_02 - 1	core	Intermediate Tonalite	2_z2	-	115	3.01	0.145	219.7	480400	0.073	-	-	2.16	-	0.198	0.344	0.197	2.86	1.118	14.5	6.79	37.1	9.8	111.9	28.5	11150	6.27	19.2
BHX_2b_02 - 2	rim1	Intermediate Tonalite	2_z2	-	122.4	3.22	0.271	601	482000	0.057	-	-	7.7	0.0157	0.54	1.68	0.65	9.97	3.62	44.4	19.03	93.1	23.5	259	60.4	12790	42.3	72
BHX_2b_02 - 3	rim2	Intermediate Tonalite	2_z2	-	170	3.64	0.199	620	486200	0.12	-	-	5.29	0.0107	0.376	0.92	0.431	7.26	2.97	41.5	19.58	106.4	27.31	311.6	75.1	11350	18.4	55.7
BHX_2b_03 - 1	core	Intermediate Tonalite	2_z3	-	125	5.29	0.161	734	492000	0.11	0.037	-	5.82	0.087	2.04	3.73	1.384	16.04	5.02	59.6	23.64	115	27.36	289.6	64.1	9640	26.49	32.26
BHX_2b_03 - 2	rim	Intermediate Tonalite	2_z3	-	270	3.47	0.384	1030	489000	0.17	-	-	9.64	0.0141	0.518	1.56	0.633	11.64	4.68	69	32.64	177.4	45.61	501	118.3	11880	26.3	83.9
BHX_2b_04 - 1	core	Intermediate Tonalite	2_z4	-	179	8.77	0.181	724	486000	0.13	-	0.0051	6.83	0.047	0.86	1.57	0.565	9.5	3.46	48.8	22.2	119.3	30.8	347	81.9	8680	23	40.5
BHX_2b_04 - 2	rim1	Intermediate Tonalite	2_z4	-	122	3.58	0.194	250.7	491000	0.077	-	-	2.9	-	0.114	0.48	0.223	3	1.313	17.36	7.86	41.59	10.51	118.7	27.87	11120	12.48	33.22
BHX_2b_04 - 3	rim2	Intermediate Tonalite	2_z4	5.9	109	2.87	0.184	263.8	483300	0.081	-	-	3.02	0.0067	0.144	0.52	0.19	3.33	1.366	18.88	8.14	43.2	11.12	126.2	29.46	11570	9.07	27.88
BHX_2b_05 - 1	core	Intermediate Tonalite		-	114.8	5.27	0.21	621	491100	0.083	-	0.0278	5.28	0.055	1.19	2.48	0.95	12.6	4.18	50.3	19.9	96	23.2	247	55.9	10350	22.55	29.88
BHX_2b_05 - 2	rim1	Intermediate Tonalite		-	113	4.11	0.145	333	491000	0.1	-	-	3.72	-	0.271	0.77	0.355	5.27	1.856	24.06	10.49	54.7	14.29	159.7	38.7	10440	11.19	21.94
BHX_2b_05 - 3	rim2	Intermediate Tonalite		-	115.6	2.34	-	377.8	494200	0.13	-	-	4.67	-	0.241	0.6	0.298	4.39	1.79	24.8	11.34	62.3	17.29	208.1	53.73	12870	14.52	40.4
BHX_2b_06 - 1	core	Intermediate Tonalite		-	107	2.97	0.201	518	490000	0.074	-	-	6.49	0.0183	0.362	0.91	0.524	7.51	2.792	36.32	15.9	82.1	20.29	222.3	52.19	12610	24.69	44.1
BHX_2b_06 - 2	rim	Intermediate Tonalite		-	151	4	0.262	526	490000	0.087	-	-	4.09	0.01	0.38	1.05	0.438	6.79	2.51	34.8	16.36	87.6	22.9	258	64	10710	14.01	42.6
BHX_2b_07 - 1	core	Intermediate Tonalite		-	320	7.17	0.303	1432	488300	0.18	-	-	10.18	0.0336	0.69	1.93	0.976	15.55	6.48	95.2	44.1	226	55.7	598	136.1	9990	40	90
BHX_2b_07 - 2	rim	Intermediate Tonalite		-	250	1.05	0.291	1800	493000	0.11	0.048	-	17.4	0.059	1.47	5	1.63	29.4	10.55	132.1	53.8	261	61.7	638	140.8	14430	81.9	137
BHX_2b_08 - 1	core	Intermediate Tonalite		-	214	7.86	0.171	684	496000	0.1	-	-	5.52	0.035	0.7	1.51	0.717	8.94	3.34	46.1	21.21	115.4	30.02	328	76.9	8720	15.77	31.7
BHX_2b_08 - 2	rim	Intermediate Tonalite		-	100	4.16	0.122	311.8	485700	0.072	-	-	3.02	0.0089	0.272	0.597	0.316	4.15	1.501	19.88	9.23	51.9	13.85	167.4	41.25	10430	10.2	24.4
BHX_2b_09 - 1	core	Intermediate Tonalite	2_z9	-	76	2.67	0.152	231	497000	0.1	-	-	3.13	0.0043	0.134	0.51	0.204	2.72	1.173	15.5	6.98	38.2	10.34	124.9	31.8	12560	11.34	30.33
BHX_2b_09 - 2	rim	Intermediate Tonalite	2_z9	-	253	3.07	0.14	491	481600	0.076	-	-	3.13	0.0124	0.191	0.81	0.408	6.16	2.55	34.2	15.75	82.2	21.5	244	58.8	10840	13.13	38.6
BHX_2b_10 - 2	rim	Intermediate Tonalite		-	127	2.71	-	240.5	491100	0.081	-	-	2.95	0.0054	0.178	0.416	0.181	2.75	1.17	16.16	7.27	39.4	10.26	117	28.6	11210	8.68	28.65
BHX_2b_11 - 1	core	Intermediate Tonalite		-	98	4.86	0.152	443	488000	0.084	0.033	-	4.15	0.0254	0.559	1.46	0.705	8.04	2.785	33.2	13.74	69.7	16.98	189.7	43.06	10560	15.82	23.57
BHX_2b_11 - 2	rim	Intermediate Tonalite		-	93.8	3.4	0.118	236.7	480600	0.097	-	-	2.78	0.0114	0.145	0.5	0.275	3.48	1.254	16.14	7.26	38.7	10.36	122.5	30.95	10670	10.09	23.35
BHX_2b_12 - 1	core	Intermediate Tonalite		-	166	4.08	0.116	322.9	488000	0.079	-	-	2.49	0.0098	0.134	0.67	0.29	3.89	1.678	21.38	9.99	54.1	14.22	170.6	42	10900	8.33	22.88
BHX_2b_12 - 2	rim	Intermediate Tonalite		-	148	2.41	0.146	453	483200	0.11	-	-	4.06	-	0.311	0.583	0.352	5.76	2.35	31.1	13.94	74.8	19.35	220.8	54.7	11640	13.73	38.4
BHX_2b_13 - 1	core	Intermediate Tonalite	2_13	-	169	4.94	0.195	391	490000	0.073	-	-	3.01	-	0.308	0.77	0.444	5.44	2.02	28.5	12.5	64.2	16.2	176	41.7	9180	9.82	21
BHX_2b_14 - 1	core	Intermediate Tonalite		-	95	2.56	0.154	475	484300	0.09	0.027	-	5.22	0.0226	0.5	1.36	0.6	8.2	2.78	35.6	14.7	74.3	18.8	207	49.2	12450	22.9	43.2
BHX_2b_14 - 2	rim	Intermediate Tonalite		-	187	3.49	0.177	371.8	484300	0.07	-	-	2.55	0.0123	0.212	0.722	0.349	5.05	1.919	26.88	11.63	61.8	15.84	178	43.32	9910	7.27	19.85
BHX_2b_15 - 1	core	Intermediate Tonalite		-	102.3	2.63	0.167	157.8	481000	0.085	-	-	2.62	-	0.115	0.202	0.125	1.69	0.718	10.84	4.75	26.07	7.16	85	21.04	12100	8.38	29.1
BHX_2b_15 - 2	rim	Intermediate Tonalite		-	108.7	2.8	0.138	287	487000	0.082	-	-	2.89	0.0116	0.22	0.67	0.34	4.21	1.463	19.47	8.67	46	12.39	152.2	39.47	11110	10.53	25.81
BHX_2b_17 - 1	core	Intermediate Tonalite	2_z17	-	214	3.11	-	452	490000	0.083	-	-	3.02	-	0.299	0.7	0.341	5.57	2.33	31.1	14.1	74.6	19.3	223	54.4	10510	11.5	34.1
BHX_2b_17 - 2	rim	Intermediate Tonalite	2_z17	-	190	4.04	-	599	493900	0.13	-	-	5.83	0.0099	0.301	0.95	0.474	8.32	3.14	42.4	18.83	97.8	24.5	269.2	62.2	11050	36.7	59.4
BHX_2b_18 - 1	core	Intermediate Tonalite	2_z18	-	215	3.99	0.278	1071	472800	0.11	-	0.0163	7.37	0.129	2.38	4.02	1.87	21.9	7.3	89.5	35.3	166	39	413	93.5	9920	46.9	77.6
BHX_2b_18 - 2	rim	Intermediate Tonalite	2_z18	-	228	4.7	0.18	789	487600	0.15	-	-	7.19	0.0207	0.452	1.27	0.565	10.36	4.18	56.8	25.07	129.5	31.5	344	80.7	10710	45.6	80.2
BHX_2b_19 - 1	core	Intermediate Tonalite	2_z19	-	122	6.68	0.284	368	489300	0.079	-	-	4.04	0.0113	0.344	0.98	0.37	5.52	1.99	25.92	11.3	58.8	15.34	173.9	40.62	9390	10.47	19.77
BHX_2b_19 - 2	rim	Intermediate Tonalite	2_z19	-	119	2.43	-	234	492500	0.089	-	-	3.59	-	0.114	0.366	0.187	3.02	1.16	16.3	7.08	38.7	9.77	114.6	27.1	11740	11.7	33.4
BHX_2b_20 - 2	rim	Intermediate Tonalite		-	136	2.78	0.187	407	492000	0.12	-	-	3.91	-	0.149	0.6	0.314	4.58	1.98	26.7	12.69	69.3	17.6	204	49.7	11310	12.11	36.8
BHX_2b_21 - 1	core	Intermediate Tonalite	2_21	-	117	2.75	0.189	393.7	496000	0.12	-	-	3.49	0.0152	0.243	0.77	0.338	5.09	1.967	26.78	12.32	66.8	17.91	212.6	53.9	11270	10.93	32
BHX_2b_21 - 2	rim	Intermediate Tonalite	2_21	-	209	4.44	0.172	692	498000	0.16	-	-	5.68	0.0133	0.401	1.12	0.488	8.1	3.35	47.3	21.6	113	28.8	327	77.5	10870	22.3	60.4
BHX_2b_22 - 1	core	Intermediate Tonalite		-	83	2.52	0.187	175.1	489000	0.091	-	-	3.14	-	0.105	0.236	0.175	1.83	0.789	10.92	5.19	28.6	7.73	94.4	24.3	12780	15.69	45.8
BHX_2b_22 - 2	rim	Intermediate Tonalite		5.9	147	2.59	0.214	681	492300	0.095	-	0.0059	6.49	0.036	0.75	2.15	0.883	12.79	4.42	53.7	22.02	106.9	26.12	281.3	64	12200	30.74	56.5
BHX_2b_23 - 1	core	Intermediate Tonalite	2_z23	-	144	3.57	0.168	645	497000	0.11	-	0.006	4.17	0.0267	0.74	2.54	0.954	12.65	4.31	52.5	20.9	100.5	23.7	250	56.2	11050	22.8	39.7
BHX_2b_23 - 2	rim	Intermediate Tonalite	2_z23	-	170	4.1	0.191	437	498900	0.1	-	-	4.19	0.0188	0.306	0.71	0.325	5.81	2.3	29.55	13.76	72.7	18.66	209.9	49.8	11130	18.59	49.7
BHX_2b_24 - 1	core	Intermediate Tonalite		-	99	2.54	0.214	204	490800	0.073	-	-	2.41	-	-	0.293	0.165	2.42	1.006	14.01	6.27	33.7	9	104.1	26.2	12060	7.86	22.07
BHX_2b_24 - 2	rim	Intermediate Tonalite		-	92.3	1.84	-	318	464000	0.28	-	-	2.55	-	0.051	0.74	0.32	3.33	1.3	21.5	9.81	52.5	13.67	158.4	39.4	11160	7.54	22.5
BHX_2b_25 - 1	core	Intermediate Tonalite	2_z25	-	337	6.41	0.353	2950	491000	0.16	-	0.033	16.5	0.239	5.05	10.8	4.55	56.5	18.4	213	83	383	86.9	858	179	8970	70.4	70.5
BHX_2b_25 - 2	rim	Intermediate Tonalite	2_z25	-	258	5.2	0.28	1025	492000	0.14	-	-	8.15	0.0252	0.57	1.6	0.836	13.41	5.32	72.7	32.69	168.5	41.27	455.2	105.7	10390	44.11	90.8
BHX_2b_26 - 1	core	Intermediate Tonalite	2_z26	-	139	3.57	0.222	627	495000	0.087	-	-	4.44	0.0306	0.69	2.28	0.939	12.7	4.06	49.2	20.57	96.8	23.18	243.5	56.1	11080	22.9	42.6
BHX_2b_26 - 2	rim	Intermediate Tonalite	2_z26	15	124	3.49	-	323.5	496000	0.099	0.073	0.0166	3.77	0.032	0.291	0.66	0.285	4.41	1.659	22.49	10.3	53.3	13.45	156.9	37.72	11360	18.8	37.8
Young Tonalite
BHX_4s_01 - 1	core	Young Tonalite		-	267	4.24	0.19	777	504700	0.14	-	-	6.3	0.0192	0.55	1.44	0.62	11.9	4.36	61	25.5	127	32.7	357	81.4	11290	28.8	58.7
BHX_4s_02 - 1	core	Young Tonalite		-	205	7.83	0.274	1970	486000	0.14	-	0.0135	10.94	0.147	2.75	5.25	1.89	33.6	11.37	145.9	58.7	269	59.9	598	125.9	9360	70.7	67.8
BHX_4s_03 - 1	core	Young Tonalite		-	290	3.49	0.209	792	500000	0.11	0.034	-	5.09	0.0268	0.52	1.66	0.718	11.24	4.15	55.9	24.72	127.9	32.39	353	84.7	10090	17.45	43.48
BHX_4s_04 - 1	core	Young Tonalite		-	283	3.32	0.164	649	497000	0.11	-	-	3.91	0.0084	0.368	0.95	0.553	8.52	3.22	45.1	20.37	108.8	27.79	314.7	76.7	10730	25.7	58.4
BHX_4s_06 - 1	core	Young Tonalite		-	204	4.34	0.202	843	495000	0.086	0.029	0.014	7.01	0.0313	0.68	1.89	0.782	12.41	4.66	62.2	27.22	138	33.63	370	86.3	10740	35	65
BHX_4s_07 - 1	core	Young Tonalite		-	127	4.58	0.221	515	489300	0.097	-	0.0082	4.47	0.041	1.12	1.94	0.843	9.46	3.12	39.6	16.27	81.3	20.23	224.6	52.41	10010	16.66	26.32
BHX_4s_08 - 1	core	Young Tonalite		-	257	2.82	0.19	545	487400	0.084	-	-	3.41	-	0.267	0.97	0.449	7.02	2.62	37	17.11	88.6	23.4	265	65.9	11140	14.2	42.9
BHX_4s_10 - 1	core	Young Tonalite		-	99	4.53	-	339	492000	0.087	-	0.0101	3.84	-	0.293	0.68	0.373	5.71	1.86	24.4	10.58	53.9	13.99	157.6	38.5	10790	18.87	28.89
BHX_4s_11 - 1	core	Young Tonalite		-	118	4.32	-	568.9	496000	0.086	-	-	4.85	0.045	1.25	2.62	0.946	11.68	3.73	45.2	18.21	88.1	21.49	239	55.5	10960	25.2	35.68
BHX_4s_12 - 1	core	Young Tonalite		-	180	2.18	0.234	543	493000	0.1	-	-	4.16	0.0209	0.426	1.3	0.576	8.8	3.04	40.5	17.1	88.7	21.9	243	57.7	12060	17.7	42.8
BHX_4s_13 - 1	core	Young Tonalite		-	209	5.71	0.233	638	487100	0.083	-	-	3.68	0.0195	0.409	1.14	0.649	7.61	3.05	42.7	19.88	106	27.03	302.4	72.4	8820	9.37	25.59
BHX_4s_14 - 1	core	Young Tonalite		-	160	3.14	0.153	275.6	491000	0.088	-	-	2.8	-	0.133	0.489	0.26	3.63	1.483	19.47	8.52	44.6	11.16	123.5	29.18	10520	11.5	24.47
BHX_4s_15 - 1	core	Young Tonalite		7.8	262	5.9	0.287	696	473200	0.12	-	0.0119	4.35	0.0267	0.42	1.2	0.725	9.71	3.4	49.6	21.98	113.9	28.23	309.6	73.6	8510	15.79	30.7
BHX_4s_16 - 1	core	Young Tonalite		-	274	9.1	0.25	1215	507000	0.19	-	-	7.73	0.028	0.65	1.75	1.122	14.84	6.09	86.2	39.1	203.3	49.5	525	119.8	9270	27	52.8
BHX_4s_17 - 1	core	Young Tonalite		-	250	6.42	-	1079	514000	0.31	0.052	-	7.78	0.026	0.5	1.83	0.91	14.03	5.69	77.1	34.31	174.6	44	482	113.8	10590	43.2	96.8
BHX_4s_18 - 1	core	Young Tonalite		41.8	217	3.01	-	619	492000	0.083	0.092	0.0212	4.76	0.0417	0.71	1.73	0.728	10.13	3.503	46.3	19.45	100.1	25.01	274	65.2	11160	27.2	48.7
BHX_4s_19 - 1	core	Young Tonalite		-	530	6.7	0.46	794	471000	0.19	-	0.138	6.22	0.242	2.25	3.56	1.64	16.4	5.54	65.5	26.05	124.8	30.01	319.9	74.4	8750	28.3	34.8
BHX_4s_20 - 1	core	Young Tonalite		-	98	1.46	-	256.6	494000	0.12	0.032	-	7.45	0.0052	0.128	0.353	0.186	2.57	1.12	16.85	7.77	42.5	11.55	137.8	35.09	15290	44.4	112.2
BHX_4s_21 - 1	core	Young Tonalite		9.3	159	4	0.35	416	461900	0.14	0.088	-	3.37	0.024	0.278	0.81	0.337	5.88	2.19	29.4	13.06	66.7	17.37	189.1	48.3	10330	15.64	33.42
BHX_4s_22 - 1	core	Young Tonalite		-	189	3.07	0.275	698	493000	0.09	0.03	-	4.01	0.036	0.84	2.22	0.968	11.23	4.12	53	22.59	114.1	28.24	305.5	71.2	10260	13.55	31.75
BHX_4s_23 - 1	core	Young Tonalite		9.1	192	3.43	0.138	397	487800	0.094	0.041	0.0139	2.64	0.0141	0.191	0.719	0.329	4.94	1.969	26.21	12.1	64.2	16.79	195.7	47.98	10710	11.59	30
BHX_4s_24 - 1	core	Young Tonalite		-	179	4.8	0.254	740	492000	0.11	-	-	5.65	0.0119	0.395	1.22	0.554	8.8	3.36	49.8	22.8	122	30.5	344	84.1	10330	24.5	62.3
BHX_4s_25 - 1	core	Young Tonalite		5.2	190	6.67	0.192	914	493000	0.11	0.062	0.0111	7.77	0.072	1.36	2.89	1.011	16	5.68	72.7	30.2	148.6	34.7	356	79.5	9420	34.2	45.97
BHX_4s_26 - 1	core	Young Tonalite		-	216	3.29	0.202	677	493000	0.079	-	-	4.75	0.0329	0.95	2.09	0.879	12.79	4.05	52.7	21.71	108.6	25.88	275.2	67	10560	25.14	47.5
BHX_4s_27 - 1	core	Young Tonalite		-	184	3.84	0.196	810	501000	0.15	-	0.0126	6.8	0.065	0.98	2.71	1.05	16.4	5.1	65	27.9	127	32.2	333	76	12030	40	57.3
BHX_4s_28 - 1	core	Young Tonalite		-	146	2.22	-	322	495000	0.085	-	-	4.89	-	0.151	0.498	0.291	3.94	1.545	21.8	9.81	53.8	14	162.6	39.2	12410	15.39	52.5
BHX_4s_29 - 1	core	Young Tonalite		-	121	5.93	0.141	335.3	491000	0.12	-	-	3.27	0.0117	0.339	0.84	0.41	4.85	1.69	22.99	10.08	54.8	14.65	179.1	45.24	9810	9.81	22.39
BHX_4s_30 - 1	core	Young Tonalite		-	217	3.27	0.229	708	500000	0.074	-	0.0092	4.8	0.0197	0.79	1.75	0.724	10.78	3.92	52.6	22.2	115.8	28.4	313	75.1	11050	18.5	45
BHX_4s_31 - 1	core	Young Tonalite		-	108	5.9	0.134	625	494000	0.1	0.031	0.0111	5.44	0.073	1.37	2.82	1.115	13.25	4.11	48.9	20.1	97.1	23.72	252.5	57.7	9220	22.55	25.98
BHX_4s_32 - 1	core	Young Tonalite		-	159	6.47	0.175	568	504100	0.13	-	0.0053	5.54	0.0198	0.48	1.21	0.472	7.1	2.75	37.3	17.4	95.2	24.64	280	67.1	9700	16.74	35.5
BHX_4s_33 - 1	core	Young Tonalite		-	171	4.42	-	466	500000	0.13	-	-	3.84	0.0127	0.212	0.75	0.361	6.04	2.42	34.3	14.7	75.6	19.1	210	50.5	10470	18.1	40.1
BHX_4s_35 - 1	core	Young Tonalite		-	287	4.36	0.273	798	487000	0.1	-	-	5.47	0.0199	0.424	1.21	0.629	10.54	4	56.3	25.2	130.2	33.2	362	87.2	10170	21	50.3
BHX_4s_36 - 1	core	Young Tonalite		-	212	4.53	0.135	617	498000	0.099	-	-	4.86	-	0.48	1.25	0.593	8.41	3.26	43	18.9	100.6	25	278	67.8	10660	24.22	52.1
BHX_4s_38 - 1	core	Young Tonalite		-	217	4.83	0.25	736	500000	0.11	-	-	6	0.0203	0.452	1.27	0.579	8.83	3.46	50	23.48	124.1	31.7	342	82.5	10550	29.84	77.5
BHX_4s_39 - 1	core	Young Tonalite		-	108.6	5.67	0.122	612	488000	0.078	-	0.0137	4.83	0.083	1.52	2.96	1.122	12.76	4.13	49.5	20.05	95.8	22.72	237.4	53.6	9420	20.9	28.9
BHX_4s_40 - 1	core	Young Tonalite		-	234	2.43	0.22	483	492000	0.074	-	-	3.14	-	0.207	0.73	0.327	5.62	2.37	32.91	14.64	80.4	21.17	238.2	59.3	11240	12.89	39.9
BHX_4s_42 - 1	core	Young Tonalite		-	126.1	3.81	0.216	591	485600	0.091	-	-	4.17	0.0232	0.77	2.13	0.894	12.37	3.83	47.9	19.12	91	21.63	226	51.8	10940	17.63	31.9
BHX_4s_43 - 1	core	Young Tonalite		-	198	2.88	0.228	439	501000	0.072	-	-	2.89	0.0083	0.227	0.67	0.346	5.33	2.08	30.3	13.49	71.4	19.1	215	52.6	11080	8.58	27.6
BHX_4s_44 - 1	core	Young Tonalite		-	220	3.3	0.171	485.8	484200	0.099	-	-	3.1	0.0131	0.228	0.79	0.33	6.01	2.396	33.63	14.83	79.6	20.53	234.8	57.27	10940	12.14	36.23
BHX_4s_45 - 1	core	Young Tonalite		-	232	3.47	0.23	515	501000	0.093	0.026	-	3.29	0.0101	0.25	0.88	0.42	6.55	2.65	34.9	15.74	85	21.41	248	60.2	10320	9.44	28.99
BHX_4s_47 - 1	core	Young Tonalite		-	254	3.7	0.204	501	495000	0.1	-	0.006	3.07	0.014	0.327	0.97	0.512	6.57	2.65	35.5	15.39	81.3	20.98	236.1	56.9	10070	9.47	27
BHX_4s_48 - 1	core	Young Tonalite		-	237	4.23	0.208	754	486000	0.12	0.026	-	5.54	0.0133	0.489	1.3	0.592	9.01	3.62	51	23.24	124	32.1	359.6	88.5	10760	25.26	68.3
BHX_4s_49 - 1	core	Young Tonalite		-	197	4.41	0.211	688	491000	0.095	-	0.0073	5.11	0.0125	0.416	1.12	0.623	8.97	3.69	50.3	21.8	108.9	27.3	293	68.8	10510	26.4	48.5
BHX_4s_50 - 1	core	Young Tonalite		-	203	4.13	0.129	543	493700	0.098	-	-	4.25	0.0106	0.274	0.86	0.38	6.46	2.78	37.9	17	91.4	23.1	258.5	63.14	10840	16.04	44
BHX_4s_51 - 1	core	Young Tonalite		-	232	5.06	0.174	654	498000	0.09	-	-	5.35	0.0116	0.317	1.1	0.566	8.74	3.41	47.6	21.41	109.2	26.02	285	66.6	10020	28.5	50.7
BHX_4s_52 - 1	core	Young Tonalite		-	213.8	3.99	0.181	724	490700	0.1	-	0.0082	5.35	0.031	0.68	1.36	0.689	10.06	3.88	51.3	22.5	116.2	29.1	312	75.6	10630	26.2	53.6
BHX_4s_53 - 1	core	Young Tonalite		9	171.4	7	0.204	532	481000	0.083	0.053	0.0093	4.59	0.0167	0.443	1.28	0.486	7.99	2.8	37.2	16.67	88.4	22.39	240.2	56.1	9120	11.46	24.4
BHX_4s_54 - 1	core	Young Tonalite		-	230	4.11	0.278	912	486000	0.15	0.035	-	7.7	0.0253	0.429	1.44	0.655	10.6	4.46	64.3	28.88	153.5	39.92	432	103.2	11150	32.33	84.6
BHX_4s_55 - 1	core	Young Tonalite		-	202	4.15	0.166	746	487000	0.14	-	-	5.66	0.0202	0.336	1.22	0.526	8.47	3.48	49.7	23.25	124.7	31.77	350.2	84	10520	23.29	61.8
BHX_4s_56 - 1	core	Young Tonalite		-	164	3.53	0.224	489	490800	0.079	-	0.0099	3.17	0.0411	0.78	1.51	0.66	8.51	3.04	37.3	15.74	78.5	19.76	214.8	51.7	10380	15.2	33.3
BHX_4s_57 - 1	core	Young Tonalite		-	298	3.09	0.206	604.7	476200	0.091	-	-	3.73	0.0135	0.306	0.98	0.495	7.89	3.19	42.3	18.99	100	25.48	289.9	69.4	10550	17.23	46.18
BHX_4s_58 - 1	core	Young Tonalite		-	202	4.71	0.279	696	485200	0.14	-	-	5.28	0.0151	0.344	1.11	0.56	8.52	3.32	47.2	21.2	109.7	27.9	312	74.7	10280	24	54.4
BHX_4s_59 - 1	core	Young Tonalite		-	282	9.07	0.28	2050	550000	0.42	-	-	12.57	0.176	2.9	6.18	2.08	36.5	11.99	145.7	57.2	260.7	58	568	112.9	9670	49.3	53.6
BHX_4s_60 - 1	core	Young Tonalite		-	180	3.58	0.234	592	484000	0.14	-	-	4.98	0.009	0.304	1.01	0.463	7.57	2.87	40.8	18.39	98.8	25.1	278	67.3	10970	17.7	49.1
BHX_4s_61 - 1	core	Young Tonalite		-	263	2.59	0.257	526	492400	0.095	-	-	3.86	0.0143	0.184	0.91	0.368	6.44	2.6	36.1	16.21	87.2	22.69	263.6	63.3	11810	16.96	48.09
BHX_4s_62 - 1	core	Young Tonalite		-	209	5.29	0.249	747	490000	0.12	-	0.0073	5.63	0.0207	0.44	1.08	0.534	8.27	3.46	50.1	23.09	121.8	30.89	340.4	82	10010	23.94	60.1
BHX_4s_63 - 1	core	Young Tonalite		-	252	3.31	0.241	751	488000	0.13	0.036	-	5.99	0.0194	0.405	1.35	0.609	10.5	3.97	52.9	23.7	121.6	30.8	341	81.7	11270	36.8	79.3
BHX_4s_64 - 1	core	Young Tonalite		-	291	4.3	0.28	543	459500	0.2	-	0.011	4.37	-	0.236	0.62	0.503	6.57	2.74	37.3	17.29	88.9	23.17	257.5	65	10400	20.34	45.5
BHX_4s_65 - 1	core	Young Tonalite		-	329	3.71	0.248	1398	487000	0.14	0.031	-	11.24	0.044	1.12	3.01	1.16	19.9	7.93	103.2	45.8	227.5	55.5	591	132.3	11120	64	119.6
BHX_4s_66 - 1	core	Young Tonalite		-	234	4.06	0.187	755	499000	0.15	-	-	6.1	0.029	0.647	1.52	0.697	10.85	4.1	54.6	24.11	125.3	31.38	343.6	79.7	11060	27	58.2
BHX_4s_67 - 1	core	Young Tonalite		-	285	5.85	0.193	1032	498000	0.17	0.028	0.026	8.62	0.028	0.55	1.74	0.73	13	5.41	73.7	32.63	167.6	41.27	443.4	102.3	10450	46.7	87.3
BHX_4s_68 - 1	core	Young Tonalite		-	231	4.82	0.171	865	490000	0.15	-	-	5.98	0.0223	0.49	1.34	0.622	9.82	3.74	55.9	26.7	145.5	37	404	98.2	10060	17.2	54
BHX_4s_69 - 1	core	Young Tonalite		-	222	4.89	0.202	809	497400	0.1	-	-	6.05	0.057	0.93	2.19	0.965	13.18	4.85	61.3	25.8	130.4	32.1	343	81.8	10260	33.6	63.1
BHX_4s_70 - 1	core	Young Tonalite		-	184	4.63	0.238	709	497700	0.13	-	-	4.29	0.048	0.92	1.7	0.893	11.51	3.92	52.2	22.5	112.5	27.6	293	67.2	9660	15.2	29
BHX_4s_71 - 1	core	Young Tonalite		-	301	2.13	0.194	635	498100	0.096	-	-	4.34	0.018	0.275	0.97	0.362	7.6	2.95	43	19.61	103.8	26.69	307	73.7	12100	25.6	57.4
BHX_4s_72 - 1	core	Young Tonalite		-	178	4.98	0.158	559	491900	0.098	-	0.0092	3.36	0.04	0.71	1.75	0.828	9.5	3.39	42.8	18.2	87.9	22	237	54.7	9260	10.5	20.4
BHX_1b_01 - 3	core	Young Tonalite	4_z1	-	138	4.45	0.187	619	491000	0.088	-	-	4.73	0.0324	0.79	1.9	0.929	12.88	4.25	51.9	20.73	98.7	23.43	246.9	56.2	11100	25.5	42
BHX_1b_03 - 3	core	Young Tonalite	4_z3	-	123	3.43	-	412	484000	0.079	-	-	4.64	0.0156	0.411	1.01	0.55	6.99	2.51	30.8	12.66	64.1	16.19	181.2	43.1	11730	23.5	37.4
BHX_1b_04 - 3	core	Young Tonalite	4_z4	-	193	6.11	0.216	633	482900	0.1	-	-	4.07	0.0169	0.318	1.2	0.586	7.4	3	42.4	19.44	104.1	26.71	298.4	71.7	8930	10.18	26.71
BHX_1b_05 - 3	core	Young Tonalite	4_z5	-	224	4.6	0.303	580	479500	0.1	-	0.0064	4.11	0.02	0.279	0.9	0.451	7.18	2.94	40.4	18.1	94.5	24.2	270	65.6	10240	16.1	41.8
BHX_1b_06 - 3	core	Young Tonalite	4_z6	-	243	2.99	0.163	501	474000	0.11	-	-	3.21	-	0.297	0.8	0.445	6.29	2.57	34	15.3	82.3	21.3	237	59.1	10070	12.5	36.6
BHX_1b_08 - 3	core	Young Tonalite		-	295	3.85	0.236	880	463700	0.15	0.048	-	7.1	0.0193	0.36	1.33	0.609	12.3	4.81	66	27.9	147	35.5	369	90	10370	39.9	69
BHX_1b_09 - 3	core	Young Tonalite	4_z9	6.3	114	3.97	0.167	250	477400	0.09	-	-	3.32	0.0069	0.177	0.397	0.274	3.22	1.278	15.77	7.41	40.5	11.35	128.7	31.7	10110	12.93	25.51
BHX_1b_10 - 3	core	Young Tonalite		-	187	4.36	-	429	487900	0.09	-	-	2.85	0.0122	0.43	0.81	0.365	5.81	2.21	30.5	13.61	71.1	17.91	204.1	49.6	9830	7.9	22.7
BHX_1b_11 - 3	core	Young Tonalite	4_z11	-	252	5.1	0.269	734	472000	0.13	0.037	-	4.35	0.027	0.53	1.05	0.692	8.66	3.38	49.7	22.65	123.7	31.7	354.7	84.9	8680	11.28	31.92
BHX_1b_12 - 4	core	Young Tonalite	4_z12	-	203	3.35	0.175	461	472900	0.091	-	-	2.95	0.0113	0.26	0.79	0.46	5.93	2.25	31.9	13.98	77	19.8	230	56.4	9750	6.93	22
BHX_1b_13 - 5	core	Young Tonalite		-	190	3.47	0.256	564	478000	0.15	-	-	5.37	0.0118	0.255	0.9	0.428	7	2.64	38.3	17.4	93	23.7	265	64	11360	27.4	74.1
BHX_1b_14 - 3	core	Young Tonalite	4_z14	-	206	3.01	0.187	711	475000	0.11	-	-	6.21	0.0174	0.39	1.11	0.488	8.79	3.29	47.8	22.21	122	31.5	352.4	83.8	11180	16.51	50.97
BHX_1b_15 - 3	core	Young Tonalite		-	218	4.72	0.229	648	483000	0.094	-	-	3.98	0.042	0.8	1.8	0.93	10.8	3.75	48.9	20.4	105	25.8	280	64.1	9490	12.6	25.6
BHX_4s_01 - 2	rim	Young Tonalite		-	299	3.61	0.239	723	503000	0.11	-	-	5.14	-	0.39	1.3	0.497	9.26	3.62	50.6	22.91	121.7	30.7	346	80.8	11220	21	58.5
BHX_4s_02 - 2	rim	Young Tonalite		-	72.9	5.22	0.183	263	505000	0.083	-	-	3.22	-	0.171	0.56	0.292	4.03	1.41	19.4	8.22	42.5	10.37	116.9	26.7	10690	6.67	13.89
BHX_4s_03 - 2	rim	Young Tonalite		-	210	2.96	-	865	488000	0.3	-	-	18.4	0.031	0.65	1.62	0.615	12.74	4.59	65.1	28.3	142.6	35.3	390	87.8	12480	133	171
BHX_4s_04 - 2	rim	Young Tonalite		-	299	7.65	0.293	1375	495700	0.15	-	-	9.39	0.0277	0.77	1.97	0.909	16.62	6.87	97.9	43.6	223.6	54.1	581	135.6	9950	56.3	111.3
BHX_4s_05 - 2	rim	Young Tonalite		-	217	4.16	-	682	493200	0.18	-	-	8.14	0.0249	0.41	1.46	0.57	10.5	3.87	51.7	21.9	108	26.7	289	67.5	10990	67	98
BHX_4s_06 - 2	rim	Young Tonalite		-	204	3.38	0.266	623	491000	0.08	-	-	4.8	0.018	0.244	1.11	0.437	8	3.1	43.6	19.13	102	25.58	289.6	69	10680	18.89	46.23
BHX_4s_08 - 2	rim	Young Tonalite		-	186	3.49	0.176	666	489300	0.08	-	-	5.35	0.0188	0.657	1.9	0.684	11.11	4.08	51.5	21.7	107.1	25.7	277.2	64.8	11010	29.1	52.1
BHX_4s_09 - 2	rim	Young Tonalite		-	251	3.65	0.159	815	489300	0.13	-	-	7.85	0.0166	0.483	1.33	0.5	9.84	3.86	55.7	25.43	133.1	33.28	365	85.7	11470	39.6	96.4
BHX_4s_10 - 2	rim	Young Tonalite		-	147	3.08	0.269	542.5	488500	0.13	-	-	15.04	0.0256	0.405	1.02	0.379	6.55	2.672	35.19	16.25	86.5	23.1	273	67.6	14810	346	398
BHX_4s_12 - 2	rim	Young Tonalite		-	366	4.64	0.316	1801	487000	0.18	-	0.0077	21.61	0.0198	0.77	2.77	1.112	23.47	9.15	126.5	55.14	274.9	65.7	691	158.2	11900	189.4	253.8
BHX_4s_14 - 2	rim	Young Tonalite		-	247	6.3	0.293	893	490000	0.088	0.039	-	5.46	0.0227	0.55	1.39	0.776	10.62	4.31	61.1	27.71	146.5	36.71	406.5	96	8810	15.58	36.74
BHX_4s_15 - 2	rim	Young Tonalite		6.8	183	3.54	0.193	508	490800	0.11	-	-	5.71	-	0.325	1.02	0.497	7.64	2.88	38.4	16.54	81.7	19.72	213.5	50.2	10230	27.9	48.9
BHX_4s_16 - 2	rim	Young Tonalite		-	314	9.57	0.292	1740	497000	0.16	-	-	10.04	0.051	0.88	2.14	1.098	17.4	7.63	110.4	48.9	246	58.7	619	139	8890	41.9	69.5
BHX_4s_17 - 2	rim	Young Tonalite		-	235	2.99	0.214	503	486200	0.088	-	-	3.33	-	0.288	0.81	0.375	6.74	2.47	35.3	15.5	83.8	21.11	240.5	57.5	10890	12.77	36.5
BHX_4s_18 - 2	rim	Young Tonalite		5.4	238	4.38	0.211	868	492800	0.17	-	0.0146	7.08	0.023	0.565	1.58	0.682	10.82	4.13	58.6	26.76	142	36.1	404	98.7	10870	26.83	72.5
BHX_4s_19 - 2	rim	Young Tonalite		-	144	5.92	-	556	486000	0.087	-	-	4.75	0.057	0.97	1.94	0.94	9.5	3.33	40.6	17.26	90.8	22.7	255	61.2	9290	17.8	30.1
BHX_4s_20 - 2	rim	Young Tonalite		-	134	2.74	0.136	276.5	488300	0.093	-	-	3.31	-	0.154	0.435	0.197	3.47	1.414	19.33	8.63	45.1	11.63	128	30.4	11390	11.79	33.5
BHX_4s_21 - 2	rim	Young Tonalite		-	194	4.22	0.153	540	482000	0.068	-	-	6.48	-	0.342	1.04	0.402	7.13	3.01	39.8	17.25	86.4	21.28	228	53	10920	47.1	74.6
BHX_4s_23 - 2	rim	Young Tonalite		-	167	4	-	625	479700	0.13	0.035	-	5.21	0.019	0.508	1.23	0.585	8.15	3.3	44.3	19.92	104.3	26.1	291	69.9	11250	22.65	56.2
BHX_4s_25 - 2	rim	Young Tonalite		-	358	6.01	0.41	1574	495000	0.17	-	0.066	13.34	0.048	0.83	2.16	0.9	17.04	7.45	108.7	49.6	256.3	63.5	685	158.3	11180	63.7	143.2
BHX_4s_26 - 2	rim	Young Tonalite		-	316	7.22	0.383	1980	490300	0.18	-	-	16.2	0.036	0.88	2.64	1.41	27.4	10.3	135	56.6	272	64	666	147	10580	111	143
BHX_4s_28 - 2	rim	Young Tonalite		-	371	7.03	0.331	2038	495000	0.16	0.04	-	18.02	0.038	0.89	3.18	1.472	25.8	9.98	139.7	59.71	293.8	70	727	164.3	10860	147.6	212.1
BHX_4s_30 - 2	rim	Young Tonalite		-	180	3.68	0.247	430	497000	0.11	-	-	4.28	-	0.291	0.79	0.342	6.03	2.29	30.3	13.76	71	17.81	195.4	46.6	11220	17.19	46.1
BHX_4s_31 - 2	rim	Young Tonalite		-	110.4	4.61	0.167	302.3	483700	0.093	-	-	3.09	0.0123	0.29	0.612	0.371	4.85	1.704	21.04	9.1	48.93	13.23	154.3	39.6	9790	8.99	18.77
BHX_4s_32 - 2	rim	Young Tonalite		-	319	11.82	0.299	1775	496000	0.18	-	0.0097	15.32	0.061	0.93	2.43	0.988	17.2	6.99	105.2	51.68	280.5	68.1	710	161.8	8780	65.8	92.3
BHX_4s_35 - 2	rim	Young Tonalite		-	402	8.71	0.28	2410	478000	0.15	0.038	0.012	17.77	0.039	1.2	3.09	1.82	29.4	11.51	154.7	66.3	323	74.6	781	179.6	10070	142.2	201
BHX_4s_36 - 2	rim	Young Tonalite		5.4	175	4.16	0.174	496.6	492000	0.082	-	-	4.86	0.0092	0.242	0.85	0.364	6.47	2.527	34.12	15.42	80.6	20.35	228.6	54.06	10630	24.9	54.7
BHX_4s_37 - 2	rim	Young Tonalite		11.1	193	4.51	0.226	627	492000	0.1	0.06	0.0145	5.38	-	0.304	0.97	0.439	7.93	3.16	44.8	20.01	104	26.49	287.4	67.6	10970	30.5	61
BHX_4s_38 - 2	rim	Young Tonalite		-	263	3.46	0.273	869	494100	0.11	-	-	6.34	0.035	0.62	1.73	0.802	11.31	4.36	60.6	27.4	142.6	35.9	395	94.2	10590	29.5	72.9
BHX_4s_39 - 2	rim	Young Tonalite		-	88	2.37	0.145	228.3	485000	0.1	-	-	3.26	0.0089	0.137	0.499	0.205	3.05	1.144	14.92	6.78	37.1	10.04	114.1	29.88	12100	12.97	37.1
BHX_4s_40 - 2	rim	Young Tonalite		-	166	3.39	0.279	534	485100	0.11	-	-	4.49	0.0114	0.492	0.87	0.433	6.79	2.84	37.7	16.62	87.2	21.73	238.4	57.2	11010	15.8	38.1
BHX_4s_41 - 2	rim	Young Tonalite		-	171	3.92	0.198	555	497000	0.14	-	0.008	4.4	-	0.269	0.79	0.417	7.57	2.84	38.8	17.32	93.2	23.97	261.8	62.3	11260	16.74	44.59
BHX_4s_43 - 2	rim	Young Tonalite		-	205	4.03	0.127	643	492000	0.1	-	-	7.23	0.0152	0.429	1.19	0.533	8.89	3.44	47	20.64	103.9	24.96	268	62.1	11130	56.7	95.9
BHX_4s_44 - 2	rim	Young Tonalite		-	249	4.15	0.223	841	484000	0.12	-	-	6.29	0.0166	0.4	1.4	0.597	9.77	4.16	58.1	26.52	140	36.12	393.1	95.5	10600	25.95	67.87
BHX_4s_45 - 2	rim	Young Tonalite		-	189	3.5	0.2	589	520000	0.17	-	-	6.09	0.011	0.44	1.03	0.412	7.11	2.91	41.4	17.83	95.4	24	258	59.9	11870	42.2	87.2
BHX_4s_47 - 2	rim	Young Tonalite		-	215	4.56	0.242	700	495800	0.099	-	-	5.34	0.0139	0.314	1.09	0.494	8.56	3.33	46.2	21.61	118.8	30.25	340.2	82.2	10840	20.31	58.8
BHX_4s_48 - 2	rim	Young Tonalite		-	245	3.34	0.219	662	498900	0.087	0.034	-	7.09	0.0106	0.256	1.22	0.477	8.57	3.39	48	21.35	107.7	26.58	285.8	66.3	11280	61.91	101.8
BHX_4s_49 - 2	rim	Young Tonalite		16.3	167	4.18	0.27	764	489300	0.14	0.067	0.0132	6.26	0.04	0.87	2.17	0.863	13.73	4.84	60.6	25.17	122.1	29.14	303.7	69.5	11330	33.38	54.71
BHX_4s_50 - 2	rim	Young Tonalite		-	182	3.49	0.239	528	492000	0.11	-	-	4.24	0.0165	0.317	0.8	0.377	6.61	2.53	37.21	16.31	87.6	22.14	245.9	59.21	11160	16.85	44.6
BHX_4s_51 - 2	rim	Young Tonalite		-	138	2.53	0.314	605	492000	0.11	-	-	5.18	0.0225	0.57	1.6	0.69	10.3	3.56	46.4	19.4	97.4	24.2	265	62.3	12030	21.6	48.6
BHX_4s_52 - 2	rim	Young Tonalite		-	234	4.72	0.175	786	485300	0.13	-	0.0091	9.76	0.0202	0.47	1.6	0.621	12.64	4.45	61.5	25.79	129.2	30.79	326.7	73.7	11230	109	109.7
BHX_4s_53 - 2	rim	Young Tonalite		-	126	6.18	0.152	389	491000	0.11	-	-	3.99	0.0192	0.345	0.88	0.352	4.99	1.95	25.6	12.04	65	16.36	179.1	41.4	10210	9.94	22.54
BHX_4s_54 - 2	rim	Young Tonalite		21.1	216	3.59	0.213	829	483000	0.11	0.069	0.027	6.57	0.027	0.77	1.95	0.824	12.43	4.64	61.4	26.66	135.8	33.5	370.1	85.2	12090	35.15	71.7
BHX_4s_55 - 2	rim	Young Tonalite		-	240	3.23	0.286	714	484000	0.084	-	-	5.38	0.0128	0.359	1.18	0.479	8.77	3.47	50.68	22.32	117.8	29.23	324.2	75.64	10920	23.29	54.84
BHX_4s_56 - 2	rim	Young Tonalite		-	152	2.75	0.127	260.9	491000	0.097	-	-	2.99	-	0.111	0.488	0.197	3.49	1.312	18.36	8.11	41.78	10.67	117.9	28.28	11250	18.16	39.2
BHX_4s_57 - 2	rim	Young Tonalite		-	230	4.35	0.281	855	477400	0.17	0.03	-	7.08	0.0213	0.407	1.27	0.579	10.15	3.9	57.9	26.8	144.5	36.8	408	96.9	10720	27.1	74.8
BHX_4s_58 - 2	rim	Young Tonalite		-	227	5.35	0.232	794	482100	0.12	-	-	6.45	0.018	0.366	1.33	0.625	9.85	3.88	53.9	24.7	129.9	33.2	357	85.9	10280	40.8	79
BHX_4s_59 - 2	rim	Young Tonalite		-	111	4.45	-	308.5	485000	0.083	-	-	3.53	0.0155	0.285	0.74	0.302	4.15	1.654	21.43	9.11	49.1	13.11	150.9	38.16	11110	11.86	25.2
BHX_4s_60 - 2	rim	Young Tonalite		-	275	3.4	0.238	875	489800	0.2	0.031	-	14.8	0.0229	0.607	1.66	0.579	12.15	4.76	63.7	27.5	141.1	35.3	379	85.3	12590	92.2	158
BHX_4s_61 - 2	rim	Young Tonalite		-	238	3.02	0.246	863	510000	0.17	-	0.0187	14.51	0.0285	0.492	1.75	0.675	12.8	4.72	64.8	28.14	142.6	35.63	386.4	90.8	13360	162	187.2
BHX_4s_62 - 2	rim	Young Tonalite		-	176	4.69	0.182	596.7	488400	0.12	-	-	4.68	0.0128	0.348	0.9	0.481	6.86	2.91	39.9	18.39	98.6	25.44	285.4	69.6	10470	17.18	47.98
BHX_4s_63 - 2	rim	Young Tonalite		-	209	2.79	0.245	581	490000	0.13	-	-	7.16	0.0132	0.476	1.1	0.437	7.62	2.99	40.3	18.39	95.6	24.4	266.2	61.8	12100	70.5	121.9
BHX_4s_64 - 2	rim	Young Tonalite		8.2	333	7.7	0.366	2070	490800	0.21	0.042	0.0183	15.69	0.051	0.88	2.78	1.3	23.2	9.62	131.3	57.7	291	69.3	729	164.7	10700	98.6	170.4
BHX_4s_65 - 2	rim	Young Tonalite		-	233	3.47	0.19	797	483400	0.14	0.029	-	10.04	0.0182	0.428	1.31	0.558	10.92	4.24	57.3	25.3	126.5	30.3	319	72.1	11640	129.8	151.7
BHX_4s_66 - 2	rim	Young Tonalite		-	225	2.59	0.323	1107	484000	0.17	-	-	14.36	0.043	0.81	2.73	0.841	16.8	5.97	81.8	35.56	182.2	45.83	498.6	117.8	12770	68.4	123.9
BHX_4s_67 - 2	rim	Young Tonalite		5.2	183	3.92	0.176	515	487900	0.14	0.027	-	6.58	0.0129	0.337	1.09	0.4	7.61	2.9	38.1	16.68	84.8	20.69	225.4	52.5	11380	49.3	83.4
BHX_4s_69 - 2	rim	Young Tonalite		-	134	2.58	-	257.8	495000	0.089	-	-	3.28	0.0067	0.11	0.338	0.185	3.7	1.401	17.74	7.92	42	10.8	117.8	28.52	12050	20	45.8
BHX_4s_70 - 2	rim	Young Tonalite		-	164	3.85	0.175	471.3	498000	0.1	-	-	3.49	0.0136	0.28	0.76	0.38	5.94	2.397	32.38	14.79	78.6	19.98	225.4	55	10320	11.69	32.15
BHX_4s_71 - 2	rim	Young Tonalite		-	204	3.81	-	508	487000	0.086	-	-	5.1	-	0.294	1.04	0.368	6.82	2.61	36	15.92	82.3	20.83	228.7	52.95	11170	27.2	68.2
BHX_4s_72 - 2	rim	Young Tonalite		-	229	6.47	0.27	839	507300	0.14	-	-	5.83	0.0208	0.51	1.29	0.682	9.17	3.75	56.1	26.1	138.9	35.4	385	91.9	10340	50	50.2
BHX_1b_01 - 4	rim	Young Tonalite	4_z1	-	161	3.39	0.209	574	492000	0.1	-	-	4.69	0.0127	0.409	1.03	0.514	8.47	2.979	41.1	18.04	96.9	24.59	278.9	66.8	11390	19.71	51.41
BHX_1b_03 - 4	rim	Young Tonalite	4_z3	-	277	4.59	0.362	1115	477800	0.17	-	-	8.78	0.0253	0.56	1.71	0.741	12.2	5.11	75.6	35.41	189.7	47.91	527.8	124.9	10600	40.02	106.9
BHX_1b_06 - 4	rim	Young Tonalite	4_z6	-	191	3.41	0.128	486	484300	0.086	-	-	5.84	-	0.341	0.99	0.413	6.81	2.57	35.25	15.66	79.9	19.66	213.5	49.18	11040	37.1	66.8
BHX_1b_07 - 4	rim	Young Tonalite		-	170	4.24	-	382	466900	0.15	-	-	4.07	-	0.213	0.67	0.367	5.03	1.94	27	12.16	61.8	15.84	171.6	41.1	10820	22.93	50.3
BHX_1b_08 - 4	rim	Young Tonalite		-	196	3.62	-	651	484500	0.11	-	-	4.99	-	0.353	0.95	0.462	8.01	3.23	45.4	20.52	107.1	26.89	297.2	70	10760	21.3	50.4
BHX_1b_10 - 4	rim	Young Tonalite		-	220	5.42	0.229	738	487800	0.1	-	-	5.24	0.0133	0.5	1.19	0.621	9.21	3.67	50.8	23.19	122.8	31.4	350	83.4	9650	17.98	47.9
BHX_1b_11 - 4	rim	Young Tonalite	4_z11	-	129	2.44	0.174	243.4	479000	0.075	0.031	-	2.58	-	0.153	0.346	0.224	2.89	1.129	16.77	7.58	40.14	10.48	116.6	27.74	11420	7.6	23.83
BHX_1b_12 - 5	rim	Young Tonalite	4_z12	-	220	4.61	0.276	850	480000	0.11	-	-	6.45	0.0224	0.445	1.09	0.55	9.45	3.9	56.5	26.28	139.9	36	400	95.9	10340	26.35	73.8
BHX_1b_14 - 4	rim	Young Tonalite	4_z14	-	160	4.17	0.19	446.1	480000	0.098	-	-	3.68	0.01	0.228	0.74	0.358	5.74	2.229	30.15	13.89	74.5	19.11	217.9	52.75	10450	12.49	34.04
BHX_1b_15 - 4	rim	Young Tonalite		-	117	3.68	0.152	216.4	476700	0.097	-	-	2.33	-	0.106	0.404	0.185	3.43	1.127	15.28	6.57	34.34	8.81	99.1	23.37	10570	8.68	20.82
BHX_4s_11 - 2	rim1	Young Tonalite		8	300	7	0.264	1096	492600	0.13	-	0.0134	8.26	0.102	1.65	3.27	1.19	20.1	6.97	86.8	36	167.4	39.4	408	90.6	8470	32.4	41.6
BHX_4s_13 - 2	rim1	Young Tonalite		-	116.2	3.67	-	246	500000	0.086	-	-	2.33	0.0103	0.162	0.5	0.21	3.28	1.208	17.28	7.64	40	10.3	115.5	27.5	10150	7.46	18.23
BHX_1b_04 - 4	rim1	Young Tonalite	4_z4	-	150	4.06	-	434	486900	0.083	-	-	2.81	0.0244	0.5	1.34	0.609	6.7	2.63	32.5	14.03	70	17.87	196.9	46.1	9400	7.14	17.43
BHX_1b_05 - 4	rim1	Young Tonalite	4_z5	-	206	3.1	0.267	373	482000	0.096	-	0.0078	2.71	0.0159	0.249	0.73	0.312	4.85	1.79	26.57	11.51	61.3	15.88	185.1	45.7	10740	9.96	28.56
BHX_4s_11 - 3	rim2	Young Tonalite		-	198	8.1	-	1169	530000	0.48	-	-	9.85	0.071	1.54	2.78	0.96	15.9	5.94	82.8	36.7	190.3	46.3	495	110.2	10138	42.5	61.3
BHX_4s_13 - 3	rim2	Young Tonalite		-	152	3.56	-	278.1	500200	0.086	0.024	-	3.31	-	0.176	0.466	0.28	3.78	1.451	19.41	8.55	45.93	11.35	128	30.21	10970	18.45	48.86
BHX_1b_04 - 5	rim2	Young Tonalite	4_z4	-	190	3.81	0.205	596	482000	0.12	-	-	4.87	0.0174	0.277	0.97	0.395	7.44	3	41.5	18.89	99.3	25.62	279.4	67.1	10900	19.64	48.99
BHX_1b_05 - 5	rim2	Young Tonalite	4_z5	-	181	2.93	0.232	690	478300	0.14	-	-	5.45	0.0102	0.355	1.01	0.484	8.16	3.314	47.6	21.69	116.9	29.25	325.7	77	11080	21.64	57.4
Quartz Diorite
BHX5_1_ - 1	core	Quartz Diorite		-	200	8.1	-	1330	412000	0.1	-	-	8.54	0.061	2.13	4.95	1.28	32.4	10.03	120.3	48.5	207	42.1	393	77.3	9390	47.4	53.5
BHX5_1_ - 2	rim	Quartz Diorite		-	180	7.6	-	1350	408000	0.12	-	-	8.2	0.092	1.98	4.49	1.18	29	10.4	121	47.8	207	43	410	78.2	9300	48	56
BHX5_3_ - 1	core	Quartz Diorite		-	155	6.6	-	826	406000	0.13	-	-	5.76	0.024	0.69	2.37	0.73	17.5	6	75.7	28.8	128.2	26.5	253	49.5	9720	22.8	31.3
BHX5_3_ - 2	rim	Quartz Diorite		-	150	7.47	0.3	729	411000	0.084	-	-	5.82	0.0031	0.47	1.61	0.439	14.8	4.9	63.6	25	112	24.2	224	44.4	9690	19.6	27.7
BHX5_4_ - 1	core	Quartz Diorite		-	187	8.1	-	1341	413000	0.12	-	-	7.44	0.103	2.19	5.62	1.39	31.9	10.23	125	48.2	209.6	43.4	400	79.2	9170	42.5	49.3
BHX5_5_ - 1	core	Quartz Diorite		-	305	8.7	-	1984	404000	0.16	0.1	-	10.65	0.166	2.85	6.08	2	44.3	14.86	182.1	71	302	63.5	564	108.6	8710	76.7	79.1
BHX5_6_ - 1	core	Quartz Diorite		-	198	7.4	-	975	408000	0.19	-	0.0142	6.41	0.051	1.45	3.85	1.01	21.6	7.3	84.7	33	149.9	32.7	303	60.4	8990	26.4	37.1
BHX5_6_ - 2	rim	Quartz Diorite		-	201	7	-	556	417400	0.15	-	-	4.31	-	0.43	1.21	0.344	9	3.33	44.1	18.7	88	20.2	210	44	9170	12.39	28.3

## Sheet: SHRIMP
	Zircon	206Pb238U agea	±2σ %	206Pb/238U ratio	±2σ %	Th/U
		in Ma	in Ma
Old tonalite
	16-1	3.42159	0.152289	0.000519	2.3e-05	0.588235
	13-1	3.68524	0.165238	0.000559	2.5e-05	0.479167
	14-1	3.73278	0.138941	0.000568	2.1e-05	0.671233
	8-1	3.73844	0.125774	0.000567	1.9e-05	0.448718
	11-1	3.74468	0.184941	0.000568	2.8e-05	0.452381
	15-1	3.80027	0.145452	0.000579	2.2e-05	0.733333
	12-1	3.89507	0.204579	0.000591	3.1e-05	0.411765
	7-1	3.99429	0.151826	0.000607	2.3e-05	0.482759
Intermediate tonalite
	1-2c	3.2766	0.290947	0.000496	4.4e-05	0.529412
	13-1	3.59086	0.191735	0.000544	2.9e-05	0.4375
	14-1	3.63752	0.145544	0.000552	2.2e-05	0.527273
	11-2r	3.66841	0.224326	0.000557	3.4e-05	0.551724
	14-1	3.71096	0.244495	0.000562	3.7e-05	0.361702
	13-1	3.72532	0.119282	0.000566	1.8e-05	0.571429
	10-1	3.73756	0.165069	0.000569	2.5e-05	0.701754
	3-1c	3.80914	0.211436	0.000577	3.2e-05	0.333333
	3-1	3.86665	0.145354	0.000588	2.2e-05	0.578947
	2-1	3.91504	0.145363	0.000594	2.2e-05	0.4
	21-1c	3.92951	0.204406	0.000597	3.1e-05	0.489362
	5-1	3.96511	0.171489	0.000603	2.6e-05	0.545455
	11-1c	3.97938	0.289694	0.000605	4.4e-05	0.52
	6-1	4.04753	0.145237	0.000615	2.2e-05	0.451613
	12-1	4.06337	0.177903	0.000619	2.7e-05	0.634146
	2-1c	4.07322	0.309093	0.00062	4.7e-05	0.571429
	6-1r	4.07973	0.244026	0.000619	3.7e-05	0.333333
	20-1c	4.19307	0.230366	0.000638	3.5e-05	0.5
Young tonalite
	21-1	3.53818	0.119531	0.000538	1.8e-05	0.695402
	5-1	3.74258	0.132337	0.000568	2e-05	0.491071
	22-1	3.75294	0.125785	0.00057	1.9e-05	0.5375
	6-1	3.78574	0.152047	0.000574	2.3e-05	0.408163
	24-1	3.91622	0.165115	0.000594	2.5e-05	0.378378
	25-1	4.11141	0.151749	0.000627	2.3e-05	0.698529
	23-1	4.19327	0.204309	0.000637	3.1e-05	0.377778
aTh disequilibrium corrected for a Th/U = 2 of the melt

## Sheet: Sample location
Samples selected for zircon LA-ICP-MS and CA-ID-TIMS analyses at Batu Hijau
BH1	location:	drillcore sample: drillcore SBD49, interval 715 - 717
Old tonalite: equigranular to slightly porphyritic with grain sizes <3 mm. Phenocrysts are dominantly plagioclase with minor quartz. Biotite occurs as a magmatic and a secondary hydrothermal variety. Relicts of clinpyroxene and amphibole were identified. Minor quartz veining. Pyrite and chalcopyrite associated with the quartz veins or disseminated within the groundmass.
BH3	location:	surface sample: 2nd bench in May 2016, West wall near the contact of the Intermediate and Young tonalite. Mine coordinates: 485 330 mE, 9 009 020 mN
Intermediate tonalite: Porphyryritic with grain sizes <6 mm. Phenocrysts are dominantly plagioclase with minor quartz. Biotite occurs as a magmatic and a secondary hydrothermal variety. Quartz veins and fine pyrite veins crosscutting the intrusive rock. Pyrite and chalcopyrite associated with the quartz veins or disseminated within the groundmass.
BH4	location:	surface sample: 2nd bench in May 2016, West wall near the contact of the Intermediate and Young tonalite. Approximate Mine coordinates: 485 330 mE, 9 008 70 mN
Young tonalite: Porphyryritic with grain sizes <6 mm. Phenocrysts are dominantly plagioclase and quartz. Biotite occurs as a magmatic and a minor secondary hydrothermal variety. Fine pyrite veins crosscutting the intrusive rock. Pyrite associated with the pyrite veins or disseminated within the groundmass.
